# Supplementary material for: Widely Targeted Metabolomics Analysis Reveals Metabolites Important for Antioxidant Properties and Quality Traits in Different Fruit Parts of Aurantii Fructus Immatures
Source: Molecules. 2024 Apr 11;29(8):1733. doi: 10.3390/molecules29081733 (PMC11051935; doi:10.3390/molecules29081733)
Supplement: Supplementary file 1 [file molecules-29-01733-s001.zip › Supplementary Table.xlsx]

## Sheet: Supplementary Table S1.
Supplementary Table S1. The Metabolites information of peel and pulp
Compounds	Q1 (Da)	Q3 (Da)	Molecular weight (Da)	Ionization model	Class	Peel-1	Peel-2	Peel-3	Pulp-1	Pulp-2	Pulp-3	QC01	QC02	QC03	cpd_ID	kegg_map
Hesperetin	301.07	164.01	302.079	[M-H]-	Flavonoids	6.72838e+06	5.38833e+06	7.27888e+06	2.41603e+07	2.10751e+07	2.23058e+07	1.33574e+07	1.33375e+07	1.33416e+07	C01709	ko00941
3-Methyl-2-Oxobutanoic acid	115.04	71.01	116.047	[M-H]-	Organic acids	114946	97931.1	90118.9	106836	115123	122253	100621	100304	100967	C00141	ko00280,ko00290,ko00770,ko00966,ko01100,ko01110,ko01210,ko01230,ko01240
N-Acetylisatin	188.04	144.05	189.043	[M-H]-	Alkaloids	1.10192e+06	1.18604e+06	1.11863e+06	736826	915737	956317	850602	855431	856453	C02172	ko00380
Eupatilin (5,7-Dihydroxy-3',4',6-Trimethoxyflavone)*	345.1	330.07	344.09	[M+H]+	Flavonoids	2.16058e+07	2.08829e+07	2.00467e+07	1.17893e+07	1.14655e+07	1.03207e+07	1.61996e+07	1.63226e+07	1.62794e+07	C10040	-
3-(4-Hydroxyphenyl)-propionic acid	165.06	119.05	166.063	[M-H]-	Phenolic acids	704250	677050	644781	1.24708e+06	1.04351e+06	1.29452e+06	821928	824424	817848	C01744	-
9,10,11-Trihydroxy-12-octadecenoic acid	329.23	311.22	330.241	[M-H]-	Lipids	291220	282971	277768	1.00243e+06	844110	990203	532024	534914	530691	-	-
9(10)-EpOME;(9R,10S)-(12Z)-9,10-Epoxyoctadecenoic acid	295.23	171.1	296.235	[M-H]-	Lipids	903135	1.15575e+06	915375	221005	173100	249621	476652	472715	474423	C14825	ko00591,ko01100
3-Hydroxy-L-phenylalanine	182.08	136.08	181.074	[M+H]+	Amino acids and derivatives	6.07982e+07	5.26958e+07	4.78821e+07	6.1132e+07	7.30179e+07	6.61945e+07	5.76007e+07	5.71139e+07	5.73626e+07	-	-
L-Prolyl-L-Phenylalanine	263.14	70.06	262.132	[M+H]+	Amino acids and derivatives	3.33685e+06	2.87754e+06	2.7057e+06	6.99382e+06	7.19143e+06	7.18751e+06	4.64275e+06	4.67089e+06	4.63088e+06	-	-
octadecanoic acid pyrrolidide	338.34	338.34	337.334	[M+H]+	Alkaloids	1.09729e+06	349674	314658	1.13731e+06	423419	462281	6.44606e+06	6.46386e+06	6.40727e+06	-	-
Jasmonoyl-L-Isoleucine	322.2	130.05	323.21	[M-H]-	Amino acids and derivatives	193972	101408	170275	103390	49452.5	67153.4	105174	105250	104386	C18699	ko04075
D-Galactose	179.06	59.01	180.063	[M-H]-	Others	7.33384e+06	7.08365e+06	7.157e+06	6.61629e+06	7.83986e+06	6.96133e+06	6.61471e+06	6.65698e+06	6.5864e+06	C00124	ko00052,ko01100
3-Oxoolean-12-en-28-oic Acid (Oleanonic acid)	453.34	453.34	454.345	[M-H]-	Terpenoids	359882	265625	212181	334230	305118	226875	323220	326209	323071	-	-
Isorhamnetin; 3'-Methoxy-3,4',5,7-Tetrahydroxyflavone	315.05	151	316.058	[M-H]-	Flavonoids	1.4451e+06	1.24489e+06	1.5448e+06	1.63818e+06	1.54586e+06	1.42988e+06	1.3876e+06	1.37243e+06	1.38456e+06	C10084	-
Thymidine	243.1	127.05	242.09	[M+H]+	Nucleotides and derivatives	437011	308413	378156	772315	711149	726387	666564	673390	666469	C00214	ko00240,ko01100,ko01232
Cordycepin (3'-Deoxyadenosine)*	252.11	136.06	251.102	[M+H]+	Nucleotides and derivatives	6.25552e+06	4.64722e+06	6.37761e+06	1.64208e+07	1.46267e+07	1.8311e+07	1.09781e+07	1.08556e+07	1.09555e+07	C08431	-
5-Hydroxy-6,7,3',4'-tetramethoxyflavone*	359.11	344.09	358.105	[M+H]+	Flavonoids	6.27475e+06	6.81745e+06	6.01464e+06	560738	530622	470861	4.13159e+06	4.07648e+06	4.08426e+06	-	-
7-Methoxycoumarin	177.05	121.06	176.047	[M+H]+	Lignans and Coumarins	957909	718256	531289	112667	112738	122920	395608	392243	397982	C09268	-
3-O-Methylgallic Acid	183.03	124.02	184.037	[M-H]-	Phenolic acids	122687	96556.3	103944	40248.3	30181	40601.6	53114.7	52720	52311.5	C05616	-
LysoPE 17:0	468.31	327.29	467.301	[M+H]+	Lipids	13489.6	11043.4	13853.5	445793	562648	408470	380322	383279	386325	-	-
3,5,6,7,8,4'-Hexamethoxyflavone*	403.14	373.09	402.132	[M+H]+	Flavonoids	5.35988e+06	4.74349e+06	5.1559e+06	948312	1.06211e+06	1.10808e+06	3.18169e+06	3.14586e+06	3.13319e+06	-	-
21,23:24,25-Diepoxy-21-hydroxylanost-7-en-3-one (Melianone)	471.35	425.2	470.34	[M+H]+	Terpenoids	5.8639e+06	5.32489e+06	7.21071e+06	2.96161e+06	2.64465e+06	3.39185e+06	4.59922e+06	4.55068e+06	4.52357e+06	-	-
Pyridoxine-5'-O-glucoside	332.13	152.07	331.127	[M+H]+	Others	252156	240571	207485	292703	306199	282567	227177	231097	229589	C03996	-
3,5-Dimethyl-2,3-dihydrobenzofuran	149.1	121.06	148.088	[M+H]+	Others	5.98716e+06	4.43396e+06	4.20069e+06	3.45216e+06	3.25238e+06	3.55076e+06	3.45386e+06	3.51541e+06	3.48978e+06	-	-
1-O-p-Coumaroylquinic acid	337.09	163.04	338.1	[M-H]-	Phenolic acids	444319	462301	500275	566613	554707	661409	534709	527689	536923	-	-
DL-Glyceric Acid	105.02	105.02	106.027	[M-H]-	Organic acids	1.97703e+06	1.87629e+06	2.08949e+06	1.69165e+06	1.48758e+06	1.70745e+06	1.8744e+06	1.9075e+06	1.9004e+06	C00258	ko00030,ko00260,ko00561,ko00630,ko01100,ko01110,ko01200
Evodiamine	304.14	134.06	303.137	[M+H]+	Alkaloids	4751.68	3251.7	5465.07	5869.79	431831	13962.9	45994.9	46800	46649.7	C09187	-
Dhurrin	312.11	132.04	311.101	[M+H]+	Alkaloids	76493.5	90123.8	41221.3	57922	57475.3	52831.3	76330	75895.2	74917.1	C05143	ko00460,ko01100,ko01110
alpha-Hydroxylinoleic acid*	295.23	195.14	296.235	[M-H]-	Lipids	1.33077e+07	1.37945e+07	1.26861e+07	1.83689e+07	1.88409e+07	2.03053e+07	1.5071e+07	1.49201e+07	1.52168e+07	-	-
5,7,4'-trimethoxyflavone	313.11	298.08	312.1	[M+H]+	Flavonoids	1.36594e+07	1.4268e+07	1.34269e+07	1.19717e+06	1.31018e+06	892678	7.91912e+06	7.76809e+06	7.80962e+06	-	-
LysoPC 14:0	468.31	184.07	467.301	[M+H]+	Lipids	25560.5	22908.1	19914.8	185024	265014	215205	111510	110181	109224	-	-
12,13-Epoxy-9-Octadecenoic Acid	295.23	195.14	296.235	[M-H]-	Lipids	241785	236655	221258	246208	225651	245893	221386	224354	219650	C14826	ko00591,ko01100
LysoPE 18:3*	476.28	335.26	475.27	[M+H]+	Lipids	142171	48830.3	70728.3	1.34484e+06	1.93661e+06	1.39408e+06	630578	623237	636880	-	-
Choline	104.11	60.08	104.107	[M]+	Alkaloids	3.54431e+07	3.659e+07	3.56365e+07	3.22795e+07	3.26776e+07	5.27267e+07	3.35281e+07	3.39661e+07	3.32432e+07	C00114	ko00260,ko00564,ko01100,ko02010
Ethyl ferulate	221.09	133.03	222.089	[M-H]-	Phenolic acids	47018.4	32323.9	34107.9	35404.4	34361.7	28942.4	34253.4	33845.1	34616.8	-	-
Kaempferol-3-O-sophoroside-7-O-rhamnoside*	757.22	287.06	756.211	[M+H]+	Flavonoids	436726	373348	90005	2.38676e+06	2.46173e+06	2.15186e+06	1.91706e+06	1.89438e+06	1.9376e+06	-	-
5,6,7,4'-Tetramethoxyflavanone	345.1	284.07	344.126	[M+H]+	Flavonoids	1.56933e+07	1.59084e+07	1.54423e+07	2.23319e+06	2.21657e+06	2.34185e+06	1.12163e+07	1.10619e+07	1.13126e+07	C15118	-
LysoPC 18:1	522.36	184.07	521.348	[M+H]+	Lipids	465474	232616	425678	8.92025e+06	1.19323e+07	1.02377e+07	4.60175e+06	4.67606e+06	4.5712e+06	-	-
Citrunobin	353.14	203.03	352.13	[M+H]+	Flavonoids	795071	673636	783332	535737	394346	463062	476012	486470	485174	-	-
2-Methylglutaric acid	145.05	101.06	146.058	[M-H]-	Organic acids	184327	143457	156020	401891	368795	396111	214442	213050	218035	-	-
Syringetin	345.06	330.04	346.069	[M-H]-	Flavonoids	9.63174e+06	8.24176e+06	9.01444e+06	2.02287e+06	1.69765e+06	1.6697e+06	6.12841e+06	6.05147e+06	6.19845e+06	C11620	ko00944,ko01110
7-Hydroxy-2',5,8-Trimethoxyflavanone	331.12	197.06	330.11	[M+H]+	Flavonoids	781110	836030	859270	110228	115693	90838.7	492167	485305	497081	-	-
4-Hydroxyquinoline	144.05	115.04	145.053	[M-H]-	Alkaloids	78218.5	73802	57597.4	47553.9	58027.4	56604	55665.2	54328.4	55016.3	C06343	-
Acerosin	359.08	329.03	360.084	[M-H]-	Flavonoids	9.23686e+06	9.11449e+06	7.93016e+06	198368	202362	163415	5.16675e+06	5.18629e+06	5.06808e+06	C09982	-
Hexadecanedioic acid	285.21	223.21	286.214	[M-H]-	Lipids	1.46812e+06	1.42559e+06	1.50364e+06	351791	306488	343070	788990	789161	772020	C19615	ko00073,ko01100
Salicylacyl Glucuronide	315.07	153.02	314.064	[M+H]+	Others	6.84188e+06	3.03682e+06	7.02031e+06	6.21937e+06	5.85527e+06	2.07778e+06	6.01165e+06	6.11084e+06	5.96006e+06	-	-
N-Methyltryptamine	175.12	144.08	174.116	[M+H]+	Alkaloids	3.1156e+07	3.13735e+07	3.2597e+07	1.28355e+07	6.62506e+06	9.38517e+06	1.64941e+07	1.6842e+07	1.6437e+07	C06213	ko00380,ko01100
D-Saccharic acid	209.03	85.03	210.038	[M-H]-	Others	7.64439e+06	9.90809e+06	9.80299e+06	1.27203e+07	1.46227e+07	1.47796e+07	1.01435e+07	10052055	9.88202e+06	C00818	ko00053,ko01100
Orange I	327.04	171.06	350.034	[M-Na]-	Alkaloids	1.10247e+06	1.09089e+06	662226	6.85213e+06	6.45126e+06	4.40799e+06	3.14652e+06	3.22452e+06	3.21549e+06	C19371	-
3-O-p-Coumaroylquinic acid*	337.09	191.06	338.1	[M-H]-	Phenolic acids	5.03587e+06	4.99155e+06	5.17906e+06	2.41943e+06	2.07581e+06	2.87604e+06	3.19907e+06	3.16027e+06	3.11453e+06	-	-
Benzamide	122.06	105.03	121.053	[M+H]+	Phenolic acids	1.37923e+06	1.30628e+06	1.27994e+06	2.7804e+06	2.99204e+06	3.13383e+06	1.69254e+06	1.71643e+06	1.73887e+06	C09815	-
16-Methylheptadecanoic acid	283.26	283.26	284.272	[M-H]-	Lipids	6.23718e+07	1.22193e+07	1.22296e+07	5.40147e+07	9.46743e+06	1.07389e+07	1.87413e+07	1.83581e+07	1.8835e+07	C20356	-
3-Ureidopropionic Acid	131.05	70.03	132.054	[M-H]-	Organic acids	948162	956372	997534	1.38378e+06	1.45599e+06	1.39474e+06	1.2041e+06	1.1771e+06	1.20628e+06	C02642	ko00240,ko00410,ko00770,ko01100
8-Geranyloxypsoralen	339.16	203.03	338.152	[M+H]+	Lignans and Coumarins	5.62778e+06	5.05557e+06	4.68118e+06	2.98445e+07	2.95629e+07	3.12327e+07	1.9927e+07	1.9974e+07	1.94736e+07	-	-
L-Homocystine	269.06	136.04	268.055	[M+H]+	Amino acids and derivatives	190753	422876	286086	46804.4	30085.8	52365.9	165163	164098	160772	C01817	ko00270
Citrusinine II	288.09	273.06	287.079	[M+H]+	Alkaloids	881080	692673	679665	14260.5	12004.9	25757.6	378946	371642	381984	-	-
Undecanedioic acid	215.13	153.13	216.136	[M-H]-	Lipids	503019	489529	458924	365709	353203	326765	388309	388453	378941	-	-
Diosmetin-7-O-Neohesperidoside (Neodiosmin)	609.18	301.07	608.174	[M+H]+	Flavonoids	2.98802e+07	2.80693e+07	3.53401e+07	3.71603e+07	3.49602e+07	2.51643e+07	3.26871e+07	3.18871e+07	3.18808e+07	-	-
Lansiumarin B	371.15	203.03	370.142	[M+H]+	Lignans and Coumarins	3.71821e+06	3.81995e+06	3.82356e+06	2.48053e+07	2.36418e+07	2.60665e+07	1.06169e+07	1.06917e+07	1.09177e+07	-	-
5-Hydroxy-7,3',4'-trimethoxyflavone*	329.1	299.05	328.095	[M+H]+	Flavonoids	8.7428e+06	6.69384e+06	6.44475e+06	3.67572e+06	3.54369e+06	3.91753e+06	5.01038e+06	5.02624e+06	4.89029e+06	-	-
Tambulin	345.1	315.05	344.09	[M+H]+	Flavonoids	1.36573e+07	1.2748e+07	1.22055e+07	1.57634e+06	1.47282e+06	1.49049e+06	8.16777e+06	8.02855e+06	8.27562e+06	-	-
N-α-Acetyl-L-ornithine	173.11	131.08	174.1	[M-H]-	Amino acids and derivatives	316421	318729	391557	441752	420354	456582	490214	504791	493131	C00437	ko00220,ko01100,ko01110,ko01210,ko01230
1,3,7-Trimethoxyxanthone	287.09	272.07	286.084	[M+H]+	Flavonoids	240937	181793	227388	9318.68	4359.27	4875.39	124206	124376	120951	-	-
2-Hydroxyphenylacetic acid	151.04	107.05	152.047	[M-H]-	Organic acids	134555	86356.1	148528	88440.8	55032.4	104717	93093.2	93425.2	90723	C05852	ko00360,ko01100
Perforamone B	291.12	219.07	290.115	[M+H]+	Others	2.697e+07	2.59353e+07	2.65106e+07	375022	371312	362046	1.69222e+07	1.63825e+07	1.66236e+07	-	-
Evodol	483.17	421.16	484.173	[M-H]-	Terpenoids	77887.9	66864.9	89547.7	70837.3	58553.8	98697.2	69467.9	70375	71748.2	-	-
Cinnamic acid	147.05	103.06	148.052	[M-H]-	Phenolic acids	337424	359307	307450	326645	319105	313766	274827	280792	283806	C00423	ko00130,ko00360,ko00940,ko00996,ko00999,ko01100,ko01110
1-O-Acetyl-Glucopyranose 6-Hydroxydecanoate	391.2	161.05	392.205	[M-H]-	Others	1.68006e+06	1.54259e+06	1.52081e+06	2.81165e+06	3.27292e+06	2.96252e+06	2.06538e+06	2.00326e+06	2.01438e+06	-	-
9-Hydroperoxy-9Z,11E-Octadecadienoic Acid	311.22	293.21	312.23	[M-H]-	Lipids	277614	223161	250280	318365	217585	249124	220654	221011	214639	-	-
6-Hydroxykaempferol-7,6-O-Diglucoside*	627.16	303.1	626.148	[M+H]+	Flavonoids	526321	798929	629737	654857	664359	457204	846285	821232	843459	-	-
Diosmetin-7-O-galactoside	463.12	301.07	462.116	[M+H]+	Flavonoids	6.71303e+06	7.04401e+06	6.36478e+06	1.10445e+07	1.04196e+07	8.5909e+06	6.80943e+06	6.94173e+06	6.71889e+06	-	-
LysoPC 15:0(2n isomer)*	482.32	184.07	481.317	[M+H]+	Lipids	139955	90294.2	120459	1.68524e+06	2.51395e+06	1.93987e+06	1.07226e+06	1.03887e+06	1.04741e+06	-	-
(S)-2-Hydroxy-3-(4-Hydroxyphenyl)Propanoic Acid	181.05	135.04	182.058	[M-H]-	Phenolic acids	133269	73598.2	137302	203764	165352	254382	140268	142020	144967	-	-
Tangeretin (4',5,6,7,8-Pentamethoxyflavone)*	373.13	343.09	372.121	[M+H]+	Flavonoids	6.03476e+07	5.32461e+07	4.98432e+07	4.11525e+06	4.078e+06	4.06123e+06	3.68318e+07	3.79705e+07	3.78762e+07	C10190	-
γ-Linolenic Acid	277.22	59.01	278.225	[M-H]-	Lipids	1.73615e+06	1.44099e+06	1.67118e+06	2.05267e+06	1.60771e+06	1.42195e+06	1.55648e+06	1.55797e+06	1.60307e+06	C06426	ko00591,ko01040,ko01100
Melibiose	341.11	113.02	342.116	[M-H]-	Others	928415	895379	561708	846777	405933	984316	538342	545752	527651	C05402	ko00052,ko01100,ko02010
Bergaptol	203.03	147.04	202.027	[M+H]+	Lignans and Coumarins	1.6007e+06	1.73719e+06	1.79585e+06	1.29879e+07	1.54718e+07	1.43556e+07	6.11577e+06	6.30185e+06	6.29663e+06	C00758	ko00999,ko01110
9,12,13-Trihydroxy-10,15-octadecadienoic acid	327.22	291.2	328.225	[M-H]-	Lipids	385855	370212	383179	1.14332e+06	1.1553e+06	1.18154e+06	614386	605821	626874	-	-
Syringaldehyde-4-O-glucoside	343.11	181.05	344.111	[M-H]-	Phenolic acids	1.73182e+07	1.77539e+07	1.54377e+07	1.07152e+07	1.20257e+07	9.13956e+06	1.43995e+07	1.39462e+07	1.43407e+07	-	-
3-Hydroxy-3-methylpentane-1,5-dioic acid	161.05	99.05	162.053	[M-H]-	Amino acids and derivatives	3.33787e+07	3.57114e+07	3.15926e+07	7.55303e+07	6.64197e+07	7.2144e+07	5.22943e+07	5.41423e+07	5.30333e+07	C03761	-
D-Glucono-1,5-lactone	177.04	59.01	178.048	[M-H]-	Others	835913	691691	687214	1.0633e+06	968112	1.05787e+06	724662	699895	715108	C00198	ko00030,ko01100,ko01110,ko01200
Carvylacetate	195.14	67.05	194.131	[M+H]+	Terpenoids	186300	192122	225090	636827	636847	647131	318686	309768	308667	-	-
N-Acetylcadaverine	145.13	86.1	144.126	[M+H]+	Alkaloids	908401	877018	560518	541917	764871	1.09104e+06	939773	936210	966782	-	-
2-Decanol*	157.16	157.16	158.167	[M-H]-	Others	5.71519e+06	5.69277e+06	5.04919e+06	3.88398e+06	3.66533e+06	4.21704e+06	4.58459e+06	4.74752e+06	4.64557e+06	-	-
2-Caffeoyl-L-tartaric acid (Caftaric acid)	311.04	179.04	312.048	[M-H]-	Phenolic acids	39477.4	38644.1	44980.9	43241.2	48167.6	41029.2	40458.5	39058.6	39661.4	-	-
2,4-Di(2-Methylbutanoyl)-3-(3-Methylpentanoyl)Sucrose-6'-O-Acetate*	649.31	101.06	650.315	[M-H]-	Others	206654	238484	173965	3534	3296	3237.96	74108.1	74181.3	76439.4	-	-
Cytarabine	244.09	112.05	243.085	[M+H]+	Nucleotides and derivatives	5.54362e+07	4.13388e+07	4.95892e+07	5.47633e+07	5.38794e+07	5.58152e+07	5.18929e+07	5.26795e+07	5.08456e+07	C02961	-
Zanthoxyloside	487.14	193.05	486.137	[M+H]+	Lignans and Coumarins	980011	1.27742e+06	1.12973e+06	98243.4	57649.4	33702.9	508625	505149	522388	-	-
5-Hydroxy-3,6,7,4',5'-Pentamethoxyflavone	389.12	359.08	388.116	[M+H]+	Flavonoids	3.49245e+07	40833738	3.36034e+07	1.95386e+07	2.0162e+07	1.8785e+07	2.83984e+07	2.74027e+07	2.78787e+07	-	-
Succinyladenosine	384.12	252.07	383.108	[M+H]+	Nucleotides and derivatives	2.63872e+06	2.76808e+06	2.6517e+06	6.44891e+06	6.17888e+06	7.37013e+06	3.72558e+06	3.59642e+06	3.6363e+06	-	-
4,5,6-Trihydroxy-2-cyclohexen-1-ylideneacetonitrile	168.07	105.03	167.058	[M+H]+	Alkaloids	1.35033e+06	1.37763e+06	1.32977e+06	2.18019e+06	2.21794e+06	2.37949e+06	1.65602e+06	1.68754e+06	1.62697e+06	-	-
Echinopsine	160.08	115.05	159.068	[M+H]+	Alkaloids	2.24448e+06	2.16817e+06	2.64173e+06	1.31234e+07	1.21405e+07	9.82687e+06	5.3512e+06	5.50987e+06	5.53637e+06	-	-
Apigenin-6,8-di-C-glucoside (Vicenin-2)	595.17	457.13	594.159	[M+H]+	Flavonoids	3.84893e+07	4.36176e+07	3.64576e+07	6.16769e+07	6.18743e+07	5.83101e+07	5.39729e+07	5.29214e+07	5.48968e+07	C10195	-
Dihydroxy-dimethoxyflavone*	315.09	282.06	314.079	[M+H]+	Flavonoids	1.37214e+07	1.21582e+07	1.30318e+07	3.0082e+06	2.82236e+06	3.51827e+06	8.40071e+06	8.09874e+06	8.23337e+06	-	-
Machilusolide D	293.21	293.21	294.219	[M-H]-	Others	7.0943e+06	6.82994e+06	7.17864e+06	2.19884e+07	2.21245e+07	2.30259e+07	1.35041e+07	1.39297e+07	1.39678e+07	-	-
7S,8S-DiHODE; (9Z,12Z)-(7S,8S)-Dihydroxyoctadeca-9,12-dienoic acid	311.22	249.22	312.23	[M-H]-	Lipids	453516	363179	408684	405548	341439	396516	336599	348447	338357	C07354	ko00591
3-Dehydro-L-Threonic Acid	133.01	71.01	134.022	[M-H]-	Others	9.11059e+06	1.15958e+07	1.45722e+07	3.0954e+07	4.24601e+07	3.39941e+07	3.22329e+07	3.31932e+07	3.33899e+07	C03064	ko00053,ko01100
2-Hydroxyhexadecanoic acid	271.23	225.22	272.235	[M-H]-	Organic acids	21769380	2.25742e+07	1.93299e+07	2.27353e+07	2.16792e+07	2.33742e+07	2.36924e+07	2.28178e+07	2.32698e+07	-	-
3,3',4',5'-Tetrahydroxy-5,7-Dimethoxyflavone*	347.08	332.05	346.069	[M+H]+	Flavonoids	3.59246e+06	2.91028e+06	3.55953e+06	2.69791e+06	4.18787e+06	2.6984e+06	3.05953e+06	3.176e+06	3.10178e+06	-	-
9,10-Dihydroxy-12,13-epoxyoctadecanoic acid	329.23	199.13	330.241	[M-H]-	Lipids	943428	926913	864001	2.06728e+06	1.99421e+06	2.00555e+06	1.22055e+06	1.26554e+06	1.23015e+06	C14837	ko00591
Citraconic acid	129.02	85.03	130.027	[M-H]-	Organic acids	434276	535596	539867	1.15117e+06	930060	1.64379e+06	884472	917345	891644	C02226	ko00290,ko00660,ko01100,ko01210
Vanillin; 4-Hydroxy-3-Methoxybenzaldehyde	151.04	136.02	152.047	[M-H]-	Phenolic acids	1.64445e+06	1.603e+06	1.54257e+06	726261	766817	793167	1.07196e+06	1.03195e+06	1.04664e+06	C00755	ko00996,ko01100,ko01110
9-Hydroxy-12-oxo-15(Z)-octadecenoic acid	311.22	223.17	312.23	[M-H]-	Lipids	303792	301190	281326	642603	478796	506410	352442	347693	361162	C21924	ko00592,ko01110
Gardenin A	419.13	404.11	418.126	[M+H]+	Flavonoids	2.89075e+07	2.88133e+07	2.71287e+07	7.81412e+06	7.81088e+06	7.93824e+06	1.85942e+07	1.84717e+07	1.79283e+07	-	-
17-Hydroxylinolenic acid	293.21	113.1	294.219	[M-H]-	Lipids	5.62821e+06	5.44305e+06	5.53185e+06	7.47312e+06	7.60544e+06	8.00356e+06	5.6382e+06	5.85454e+06	5.79641e+06	C16346	ko00592
LysoPE 16:0*	454.29	313.27	453.286	[M+H]+	Lipids	570942	339958	401951	2.78296e+06	3.71462e+06	2.29548e+06	4.02681e+06	4.18552e+06	4.09296e+06	-	-
3-Methylcrotonyl-L-glycine	158.08	83.05	157.074	[M+H]+	Amino acids and derivatives	27655.4	29503.4	32569.6	37353.3	41150.1	47492.6	32289.3	33179.6	33542.3	C20828	-
5-Hydroxy-3,7,3',4'-tetramethoxyflavone (Retusin)*	359.11	344.09	358.105	[M+H]+	Flavonoids	6.85527e+06	6.89106e+06	6.4833e+06	518173	468443	411941	4.18569e+06	4.17183e+06	4.03932e+06	-	-
4-Hydroxyphenyllactic Acid	181.05	135.04	182.058	[M-H]-	Phenolic acids	183305	100591	137229	227938	153594	230522	147088	148993	152833	C03672	-
3',4',5',5,7-Pentamethoxyflavone*	373.13	343.08	372.121	[M+H]+	Flavonoids	6.26736e+07	5.67427e+07	3.38357e+07	2.98116e+06	2.74232e+06	3.19739e+06	2.74192e+07	2.85058e+07	2.81861e+07	-	-
3,5,6,7,8,3',4'-Heptamethoxyflavone	433.15	403.11	432.142	[M+H]+	Flavonoids	1.32707e+07	1.25128e+07	1.33785e+07	1.89671e+06	2.00157e+06	2.0685e+06	7.63743e+06	7.43562e+06	7.3463e+06	-	-
Quercetin-3,7-Di-O-glucoside	627.14	303.05	626.148	[M+H]+	Flavonoids	480611	398986	447480	602954	623858	497134	711425	684139	704299	-	-
toddanol	279.11	207.06	278.115	[M+H]+	Lignans and Coumarins	45292.3	36283.9	32695.5	9569.77	7251.57	11800.6	21430.8	20939.9	20585	-	-
Citrusin I	704.4	686.39	703.39	[M+H]+	Alkaloids	1.65419e+07	1.44819e+07	1.61555e+07	2.17257e+07	2.16728e+07	2.18525e+07	1.64699e+07	1.60624e+07	1.58168e+07	-	-
2,4-Di(2-Methylbutanoyl)-3-(3-Methylpentanoyl)Sucrose-6-O-Acetate*	649.31	101.06	650.315	[M-H]-	Others	198684	211847	162264	1998.92	2045.13	1640.91	71953	69504.1	69381.3	-	-
D-Trehalose	341.11	119.03	342.116	[M-H]-	Others	1.2972e+06	1.09615e+06	509553	551709	584845	727211	580951	590572	605232	C01083	ko00500,ko01100,ko01110,ko02010
α-Hydroxycinnamic Acid*	163.04	119.05	164.047	[M-H]-	Phenolic acids	5.54082e+06	8.64041e+06	8.30816e+06	2.05137e+07	1.96511e+07	2.08477e+07	1.25688e+07	1.20585e+07	1.23234e+07	C02763	ko00360,ko01100
Hydroxyrudicoumarin C glucoside	427.16	265.11	426.153	[M+H]+	Lignans and Coumarins	64032.8	67505	45714.8	830005	574921	1147505	512505	532505	530005	-	-
6-O-Caffeoyl-D-glucose*	341.09	179.03	342.095	[M-H]-	Phenolic acids	572026	778975	715724	628659	629130	580791	776734	789019	809291	-	-
9-Hydroperoxy-10E,12,15Z-octadecatrienoic acid	309.21	209.05	310.214	[M-H]-	Lipids	688633	684133	658580	729403	668033	689607	585392	561430	575463	C16321	ko00592,ko01110
LysoPE 15:0(2n isomer)*	440.28	299.26	439.27	[M+H]+	Lipids	39483.9	23317.5	35713	392544	542915	365898	295936	299033	308085	-	-
7-Methoxy-8-(l'-methoxy-2'-hydroxy-3'-methyl-3'-butenyl)coumarin	291.12	219.06	290.115	[M+H]+	Lignans and Coumarins	2.52069e+07	2.80211e+07	2.63177e+07	429861	366605	351127	1.67698e+07	1.62469e+07	1.69127e+07	-	-
9-Hydroxy-12-oxo-10(E),15(Z)-octadecadienoic acid	309.21	171.1	310.214	[M-H]-	Lipids	397807	390143	452869	1.12307e+06	1.03509e+06	1.13453e+06	644028	618764	639695	C21923	ko00592,ko01110
N-Acetyl-L-Glutamine	187.07	125.07	188.08	[M-H]-	Amino acids and derivatives	1.55301e+06	1.34428e+06	1.30654e+06	1.60976e+06	1.68472e+06	1.48971e+06	1.28043e+06	1.28612e+06	1.23634e+06	-	-
Deacetylnomilin	473.22	427.21	472.21	[M+H]+	Terpenoids	351761	321924	422459	254779	223957	318703	297868	304455	291638	-	-
Altisin*	359.1	344.09	358.105	[M+H]+	Flavonoids	6.50927e+06	4.71676e+06	4.31449e+06	1.24228e+06	1.31498e+06	1.10464e+06	3.04833e+06	3.04787e+06	3.16321e+06	-	-
7,8-Dihydroxy-5,6,4'-trimethoxyflavone*	345.1	330.07	344.09	[M+H]+	Flavonoids	2.33092e+07	2.16232e+07	2.11548e+07	1.22491e+07	1.23621e+07	1.06868e+07	1.77113e+07	1.70118e+07	1.76013e+07	-	-
Guanosine 3',5'-cyclic monophosphate	344.04	150.04	345.047	[M-H]-	Nucleotides and derivatives	206461	274547	178130	501964	436901	514017	335040	322815	335355	C00942	ko00230,ko01100
3-Indoleacrylic acid	188.07	118.07	187.063	[M+H]+	Alkaloids	1.47669e+06	1.67582e+06	1.54377e+06	2.06731e+06	1.83532e+06	1.71009e+06	1.59043e+06	1.57701e+06	1.64262e+06	C21283	-
LysoPE 15:0*	440.28	299.26	439.27	[M+H]+	Lipids	39561.8	22136.1	29327.9	393110	535265	364726	287616	279599	291840	-	-
2-Isopropylmalic Acid	175.06	115.04	176.069	[M-H]-	Organic acids	1.9309e+06	2.01411e+06	2.35502e+06	4.99347e+06	4.03708e+06	3.77291e+06	2.76769e+06	2.65519e+06	2.68248e+06	C02504	ko00290,ko00620,ko01100,ko01110,ko01210,ko01230
Vanilloloside	315.11	153.02	316.116	[M-H]-	Phenolic acids	1.32829e+07	1.75307e+07	1.61972e+07	643918	625499	702328	7.6735e+06	7.97001e+06	7.96973e+06	-	-
9-Hydroxy-13-oxo-10-octadecenoic Acid	311.22	293.21	312.23	[M-H]-	Lipids	827504	878290	864145	393984	377397	328074	562191	559350	582087	-	-
5-hydroxyl-3',4',7,8-tetramethoxyl flavone*	359.11	344.09	358.105	[M+H]+	Flavonoids	6.75744e+06	4.87426e+06	4.52853e+06	1.41541e+06	1.37238e+06	1.21418e+06	3.26713e+06	3.30807e+06	3.40846e+06	-	-
7-Hydroxy-3,5,6,8-tetramethoxyflavone*	359.11	344.09	358.105	[M+H]+	Flavonoids	8.04125e+06	7.98952e+06	6.94332e+06	479825	523535	429589	4.18506e+06	4.3701e+06	4.30673e+06	-	-
Chrysoeriol-6,8-di-C-glucoside-4'-O-glucoside*	787.23	625.17	786.222	[M+H]+	Flavonoids	2.11011e+06	1.97474e+06	1.96008e+06	1.46677e+06	1.30404e+06	1.59609e+06	1.65685e+06	1.69459e+06	1.73162e+06	-	-
4-O-p-Coumaroylquinic acid	337.09	163.04	338.1	[M-H]-	Phenolic acids	245341	249563	299391	529839	514920	563979	373945	390925	380688	C10441	-
1-Acetyl-β-carboline	211.09	193.07	210.079	[M+H]+	Alkaloids	189417	215936	183905	423200	496551	503537	246543	254201	257650	-	-
Eriostemin	375.11	345.06	374.1	[M+H]+	Flavonoids	1.82155e+06	1.80838e+06	1.63798e+06	77028.1	98050.8	77544.7	736365	770406	752941	-	-
Glucose-1-phosphate*	259.02	96.97	260.03	[M-H]-	Others	297883	347609	370519	890230	1.06534e+06	1.21785e+06	610681	625403	597671	C00103	ko00010,ko00040,ko00052,ko00500,ko00520,ko00561,ko01100,ko01110,ko01240,ko01250
L-Glutamine-O-glycoside	307.11	145.06	308.122	[M-H]-	Amino acids and derivatives	950462	809898	1.01198e+06	2.43598e+06	2.3206e+06	3.21358e+06	2.3374e+06	2.43657e+06	2.35029e+06	-	-
Bergamottin	339.15	203.03	338.152	[M+H]+	Lignans and Coumarins	764372	712974	945025	1.70104e+07	1.68022e+07	1.60675e+07	1.43815e+07	1.37793e+07	1.42768e+07	C22152	ko00999,ko01110
4-puinazolinone	147.06	77.04	146.048	[M+H]+	Alkaloids	151555	142574	141506	54287.9	67586.2	61633.7	75837.1	78678.8	79102.6	-	-
Dihydroxybalfourodine	322.13	177.05	321.121	[M+H]+	Alkaloids	3.94885e+06	3.91677e+06	3.43037e+06	1.13606e+06	1.0689e+06	894669	2.04969e+06	1.97352e+06	1.96773e+06	-	-
Pyroglutamic acid	130.05	84.05	129.043	[M+H]+	Amino acids and derivatives	800937	957229	553903	1.03928e+06	1.33167e+06	993509	862747	901580	892705	-	-
5-O-Methylvisamminol	291.12	219.07	290.115	[M+H]+	Others	2.53208e+07	2.44707e+07	2.46897e+07	157399	157808	150097	1.48953e+07	1.42923e+07	1.48566e+07	C09016	-
Vitexin-7-O-(6''-feruloyl)glucoside	771.21	177.1	770.206	[M+H]+	Flavonoids	62550.6	38149.2	38912	76156.1	47736.4	67783.9	45819.2	43795.7	45234.3	-	-
Eupatorin; 3',5-Dihydroxy-4',6,7-Trimethoxyflavone*	345.1	330.07	344.09	[M+H]+	Flavonoids	1.42355e+07	1.37624e+07	1.37918e+07	5.9214e+06	5.72062e+06	5.77539e+06	1.07239e+07	11189484	1.1155e+07	-	-
5,6,2',3',4',6'-Hexamethoxyflavone	403.14	373.09	402.132	[M+H]+	Flavonoids	1.6112e+07	1.47887e+07	1.71029e+07	2.65356e+06	2.86885e+06	2.49983e+06	9.25926e+06	8.95277e+06	9.3759e+06	-	-
Asp-Lys	262.14	84.08	261.132	[M+H]+	Amino acids and derivatives	450497	464789	363365	468823	712105	757409	520702	510297	496563	-	-
9,12,13-TriHOME; 9(S),12(S),13(S)-Trihydroxy-10(E)-octadecenoic acid	329.23	211.14	330.241	[M-H]-	Lipids	3.30424e+06	3.68538e+06	3.4533e+06	1.1617e+07	1.14224e+07	1.11325e+07	6.13554e+06	6171336	5.90501e+06	C14833	ko00591
3,7-Di-O-methylquercetin	329.07	314.04	330.074	[M-H]-	Flavonoids	1.32818e+06	685321	576884	110752	104023	100566	792778	767468	756748	C01265	ko00944,ko01110
Erucic acid	337.31	337.31	338.318	[M-H]-	Lipids	1.86457e+06	1.19306e+06	1.50766e+06	1.93085e+06	1.67394e+06	993272	2.20506e+06	2.21498e+06	2.30271e+06	C08316	ko01040
Sorbifolin 5-[6''-(3-Hydroxy-3-Methylglutaryl)Glucoside]	607.16	301.07	606.159	[M+H]+	Flavonoids	1.99606e+07	2.2205e+07	2.37068e+07	1.45002e+07	1.74103e+07	1.68594e+07	1.91468e+07	1.8503e+07	1.82857e+07	-	-
5,7,2'-Trhiyroxy-8-methoxyflavone*	299.06	284.04	300.063	[M-H]-	Flavonoids	6.15403e+06	5.7298e+06	5.04037e+06	2.80525e+06	2.4401e+06	2.63946e+06	4.80189e+06	4.72955e+06	4.95773e+06	-	-
N-Acetyl-L-phenylalanine	206.08	58.03	207.089	[M-H]-	Amino acids and derivatives	5.5377e+06	6.25777e+06	5.73799e+06	6.13028e+06	6.35431e+06	7.16775e+06	5.77436e+06	6.05902e+06	5.9423e+06	C03519	ko00360,ko01100
2,3,4-Trihydroxybenzoic acid	169.01	151	170.022	[M-H]-	Phenolic acids	1.66091e+06	1.26372e+06	1.38332e+06	830951	776836	819502	764521	799130	795556	-	-
LysoPC 15:0*	482.32	184.07	481.317	[M+H]+	Lipids	171593	109477	130636	1.87475e+06	2.70932e+06	2.15718e+06	1.16553e+06	1.11775e+06	1.11795e+06	-	-
1-O-Caffeoyl-β-D-glucose*	341.09	179.04	342.095	[M-H]-	Phenolic acids	577803	562804	635074	612182	615949	617125	771379	807338	802442	C10433	-
N-Glycyl-L-leucine	189.12	86.1	188.116	[M+H]+	Amino acids and derivatives	3.29539e+06	2.59594e+06	3.56764e+06	4.52218e+06	3.89896e+06	4.6993e+06	2.87802e+06	3.01805e+06	2.98359e+06	C02155	-
Quinic Acid	191.06	85.03	192.063	[M-H]-	Organic acids	1.17479e+06	1.14293e+06	1.28468e+06	2.44094e+06	2.98225e+06	2.43457e+06	2.71835e+06	2.63706e+06	2.58922e+06	C00296	ko00400,ko01100
3,4,5-Trimethoxycinnamic acid	237.08	103.02	238.084	[M-H]-	Phenolic acids	763698	757592	791811	9391.2	6949.6	12574.2	434374	453567	453442	-	-
LysoPE 18:0	482.32	341.31	481.317	[M+H]+	Lipids	13824.2	7714.02	5898.21	64716.8	75378.1	26095.8	682727	670262	703796	-	-
Norlinolenic acid	263.2	59.01	264.209	[M-H]-	Lipids	41020.8	38568.5	39487.4	84038.1	71283.7	79646.1	59557.9	59723.2	62229.9	C16344	ko00592
Marmin[7-(6',7'-Dihydroxygeranyloxy)coumarin]	333.17	163.04	332.162	[M+H]+	Lignans and Coumarins	7.03291e+06	6.872e+06	7.16216e+06	1.26398e+06	1.21334e+06	1.16528e+06	4.8194e+06	4.69363e+06	4.58563e+06	-	-
D-Threose	121.05	93.06	120.042	[M+H]+	Others	1.06798e+06	972700	1.42929e+06	1.183e+06	1.65133e+06	1.14993e+06	964931	983432	1.01369e+06	C06463	-
1-Stearidonoyl-Glycerol	351.25	147.12	350.246	[M+H]+	Lipids	182874	203185	212239	244474	224536	205990	189408	197012	198460	-	-
4-Hydroxysphinganine	318.3	60.04	317.293	[M+H]+	Lipids	272310	187076	255732	783815	734509	561804	1.53902e+06	1.47163e+06	1.47724e+06	C12144	ko00600,ko01100
Punicic acid (9Z,11E,13Z-octadecatrienoic acid)	279.23	95.09	278.225	[M+H]+	Lipids	1.83063e+07	1.72172e+07	1.61845e+07	2.83341e+07	2.51122e+07	2.7751e+07	2.2101e+07	2.14687e+07	2.10248e+07	C08364	-
13S-Hydroxy-9Z,11E,15Z-octadecatrienoic acid	293.21	195.14	294.219	[M-H]-	Lipids	2.89009e+06	2.91733e+06	2.79041e+06	5.48663e+06	5.19176e+06	5.33437e+06	3.46864e+06	3.50423e+06	3637242	C16316	ko00592
2'-Deoxyinosine-5'-monophosphate	333.06	137.05	332.052	[M+H]+	Nucleotides and derivatives	3.16728e+06	3.59715e+06	2.87399e+06	179682	126167	115372	1.50829e+06	1.48536e+06	1.55996e+06	C06196	ko00230,ko01232
Tricin (5,7,4'-Trihydroxy-3',5'-dimethoxyflavone)	331.08	315.05	330.074	[M+H]+	Flavonoids	100153	90557.5	99548.5	45657.3	39804.9	53805.9	63139.6	60668.4	63600.9	C10193	-
LysoPE 20:2*	506.32	365.31	505.317	[M+H]+	Lipids	3470.37	1718.07	3288.56	91844.3	120862	92294.4	55744.4	58404.3	56125.8	-	-
LysoPC 18:3(2n isomer)*	518.32	184.07	517.317	[M+H]+	Lipids	656745	255035	359063	6.47828e+06	8.56504e+06	6.70189e+06	2.91241e+06	2.78065e+06	2.79718e+06	-	-
9-Hydroxyheterogorgiolide	277.14	189.09	276.136	[M+H]+	Terpenoids	1.14653e+07	1.21606e+07	7.58435e+06	129787	118526	84610.4	5.17964e+06	5.27993e+06	5.44698e+06	-	-
LysoPC 19:1	536.37	184.07	535.364	[M+H]+	Lipids	20209.7	17344.1	18156.1	1.83046e+06	2.32002e+06	1.75792e+06	913299	892143	867935	-	-
11-Octadecanoic acid(Vaccenic acid)*	281.25	281.25	282.256	[M-H]-	Lipids	4.80739e+07	5.0371e+07	5.15005e+07	4.58029e+07	6.57709e+07	4.56645e+07	7.28233e+07	6.93264e+07	7.19623e+07	C21944	-
Eicosenoic acid	309.28	309.28	310.287	[M-H]-	Lipids	1.687e+07	1.74235e+07	1.55501e+07	1.35402e+07	2.60043e+07	9.31241e+06	1.58951e+07	1.65322e+07	15763276	C16526	ko01040
isopimpinellin	247.06	217.01	246.053	[M+H]+	Lignans and Coumarins	3.37106e+07	4.39376e+07	2.90915e+07	4.61362e+07	4.38393e+07	4.47285e+07	3.04982e+07	3.01949e+07	2.90429e+07	C02162	ko00999,ko01110
Caffeic acid	179.03	135.05	180.042	[M-H]-	Phenolic acids	9.01067e+06	1.03139e+07	9.97243e+06	6.40604e+06	5.6872e+06	5.35684e+06	7.28545e+06	7.19338e+06	7.55635e+06	C01197	ko00940,ko01100,ko01110
Flindulatin	359.11	344.09	358.105	[M+H]+	Flavonoids	1.38842e+07	1.36054e+07	1.43123e+07	2.61122e+06	2.51484e+06	2.24535e+06	8.3848e+06	8.54771e+06	8.12186e+06	-	-
2-Picolinic acid	122.02	78.03	123.032	[M-H]-	Organic acids	1.5752e+06	1.43744e+06	1.55206e+06	1.86173e+06	1.84074e+06	2.19795e+06	1.37388e+06	1.36587e+06	1.43153e+06	C10164	ko00380,ko01100
9-Hydroxy-10,12,15-octadecatrienoic acid	293.21	235.17	294.219	[M-H]-	Lipids	91429.7	127942	80354.7	78891.3	77281.8	86680.9	121189	118091	124337	C16326	ko00592
Dimethylfraxetin; 6,7,8-Trimethoxycoumarin*	237.07	176.05	236.069	[M+H]+	Lignans and Coumarins	6.3638e+06	7.77342e+06	4.85992e+06	4.45922e+06	4.85103e+06	2.79211e+06	4.00924e+06	3.88213e+06	3.81061e+06	-	-
4',5'-Dihydropsoralen	189.06	131.05	188.047	[M+H]+	Lignans and Coumarins	2.05749e+07	2.00229e+07	1.90901e+07	368640	278383	370278	1.31819e+07	1.29282e+07	1.25232e+07	-	-
4,8-Dihydroxyquinoline-2-carboxylic acid	204.03	160.04	205.037	[M-H]-	Organic acids	353992	303599	342101	142593	128084	136206	226697	237863	228649	C02470	ko00380
1-Methoxy-indole-3-acetamide	205.1	146.06	204.09	[M+H]+	Alkaloids	1.10364e+07	1.02882e+07	9.4186e+06	1.18144e+07	1.17441e+07	1.13751e+07	1.00946e+07	9.83313e+06	9.58653e+06	-	-
LysoPC 16:1*	494.32	184.07	493.317	[M+H]+	Lipids	29108	39563.1	28561.7	948909	1.33901e+06	1056238	343855	361767	349933	-	-
5-Hydroxy-L-tryptophan	221.09	204.07	220.085	[M+H]+	Amino acids and derivatives	561436	549527	515718	548313	567329	553381	418673	432448	410902	C00643	ko00380,ko01100
Apigenin; 4',5,7-Trihydroxyflavone	271.06	153.02	270.053	[M+H]+	Flavonoids	63989.5	37359.1	45861.4	185410	184990	206175	87692.7	83524.5	84337.4	C01477	ko00941,ko00943,ko00944,ko01100,ko01110
4'-hydroxy-2,4,6-trimethoxydihydrochalcone	315.12	255.11	316.131	[M-H]-	Flavonoids	68929.1	74385.8	72912.1	62558.2	62597	58927.1	63423	64459.6	66743.1	-	-
Limocitrin (5,7,4'-trihydroxy-8,3'-dimethoxyflavone)	347.07	332.05	346.069	[M+H]+	Flavonoids	4.11575e+06	3.72142e+06	4.42202e+06	1.15553e+06	1.17165e+06	1.02747e+06	3.17063e+06	3.2681e+06	3.10221e+06	-	-
Stearamide	284.29	88.08	283.288	[M+H]+	Alkaloids	1.88457e+06	1.30868e+06	1.29454e+06	1.3336e+06	1.60818e+06	1.00853e+06	7.08861e+06	6.9122e+06	6.72535e+06	C13846	-
Riboflavin (Vitamin B2)	377.15	243.09	376.138	[M+H]+	Others	1.46711e+06	1.15897e+06	1.70223e+06	631727	625492	657171	833674	859419	815304	C00255	ko00740,ko01100,ko01110,ko01240,ko02010
2,3,23-Trihydroxyolean-12-en-28-oic acid methyl ester	487.34	487.34	488.35	[M-H]-	Terpenoids	193307	385389	200098	174006	184683	173615	190880	201253	196989	-	-
2-O-Feruloylglucaric Acid	385.08	209.03	386.085	[M-H]-	Phenolic acids	1.78391e+07	1.83997e+07	1.7144e+07	2.15841e+06	2.11324e+06	2.06381e+06	8.07118e+06	8.35169e+06	7.92607e+06	-	-
5-O-p-Coumaroylquinic acid*	337.09	191.06	338.1	[M-H]-	Phenolic acids	631096	523263	607869	8.65735e+06	8.78565e+06	8.34733e+06	3.73426e+06	3.90369e+06	3.72359e+06	C12208	ko00940,ko00941,ko00945,ko01110
Vitexin-2''-O-rhamnoside	579.17	433.11	578.164	[M+H]+	Flavonoids	1.3257e+06	712887	1.63099e+06	5.39244e+06	5.0466e+06	4.67722e+06	3.13356e+06	2.99936e+06	2.98617e+06	C12628	ko00944
cis-Dehydroosthol	243.1	131.05	242.094	[M+H]+	Lignans and Coumarins	1.8409e+06	1.6636e+06	1.68842e+06	236390	225207	175009	810560	780599	822585	-	-
Hypolaetin 7,8,3',4'-Tetramethyl Ether	359.11	329.07	358.105	[M+H]+	Flavonoids	1.40167e+07	1.23503e+07	1.30256e+07	4.89604e+06	3.92806e+06	4.26675e+06	7.44719e+06	7.56975e+06	7.85046e+06	-	-
Dihydrosuberenol	263.13	189.05	262.12	[M+H]+	Lignans and Coumarins	8.63119e+06	8.47313e+06	9.91093e+06	456292	473378	397582	5.45593e+06	5.20451e+06	5.46018e+06	-	-
10,16-Dihydroxypalmitic acid	287.22	241.22	288.23	[M-H]-	Lipids	54427.9	50305.7	42637.4	10982.7	12186	8953.23	25664.2	26339.3	24940.7	C08285	ko00073
5-Hydroxyindole-3-acetic acid	190.05	146.06	191.058	[M-H]-	Alkaloids	153547	151966	177859	235329	293180	324771	185016	194996	192606	C05635	ko00380,ko01100
LysoPE 18:2(2n isomer)*	478.29	337.27	477.286	[M+H]+	Lipids	548750	193667	314172	6.16419e+06	7.94978e+06	5.57999e+06	2.97249e+06	3.13597e+06	3.02762e+06	-	-
Rhamnetin-3-O-Glucoside*	479.12	317.07	478.111	[M+H]+	Flavonoids	5.86337e+07	6.26372e+07	5.85241e+07	3.37554e+07	3.60169e+07	3.6552e+07	5.27096e+07	4.9945e+07	5.18423e+07	-	-
Naringenin (5,7,4'-Trihydroxyflavanone)*	273.08	153.02	272.068	[M+H]+	Flavonoids	1.55954e+07	1.0843e+07	1.51237e+07	2.36792e+07	2.28664e+07	2.22996e+07	1.74229e+07	1.71251e+07	1.65061e+07	C00509	ko00941,ko00943,ko01100,ko01110
L-Prolyl-L-Leucine	229.15	70.07	228.147	[M+H]+	Amino acids and derivatives	4.40605e+06	1.73151e+06	2.41352e+06	2.71475e+06	2.42523e+06	2.92984e+06	2.06801e+06	2.1839e+06	2.1125e+06	-	-
Dodecanoic acid (Lauric acid)	199.17	199.17	200.178	[M-H]-	Lipids	3.10863e+06	2.77058e+06	3.04585e+06	2.04458e+06	1.83174e+06	1.80074e+06	2.20116e+06	2.10273e+06	2.2119e+06	C02679	ko00061,ko01100,ko01110
1,3,7-trihydroxy-6-methoxyxanthen-9-one	275.06	260.03	274.048	[M+H]+	Flavonoids	175876	148135	162311	2.60253e+06	2.79658e+06	2.76904e+06	1.02404e+06	1.03078e+06	979116	-	-
Vicenin-3	563.14	353.09	564.148	[M-H]-	Flavonoids	197110	153354	229185	581124	716279	667552	401423	423695	417735	-	-
Aurapten	299.16	163.04	298.157	[M+H]+	Lignans and Coumarins	2.30536e+07	2.20856e+07	2.26578e+07	5.42718e+06	5.07081e+06	4.58552e+06	1.66101e+07	1.58529e+07	1.58132e+07	-	-
2-Methoxy-4-ethenylphenol	151.08	91.05	150.068	[M+H]+	Phenolic acids	343856	370850	343123	853933	410449	952915	367449	380219	359731	C17883	-
Dendrocrepine*	575.35	279.2	516.335	[M+CH3COOH-H]-	Alkaloids	332129	249160	400997	899667	1.02566e+06	1.07152e+06	608158	637791	639524	-	-
3-Hydroxylup-20(29)-en-28-oic acid (Betulinic acid)	455.36	455.36	456.36	[M-H]-	Terpenoids	98562.7	92171.7	99014.4	333669	355168	316329	199084	189518	198990	C08619	-
Robustine	216.07	145.03	215.058	[M+H]+	Alkaloids	173628	181477	167367	234008	251246	170336	172005	162632	166854	C10736	-
Stearic Acid	283.26	283.26	284.272	[M-H]-	Lipids	6.51105e+07	1.30458e+07	1.27782e+07	5.50073e+07	1.05398e+07	1.22352e+07	1.87499e+07	1.85733e+07	1.95752e+07	C01530	ko00061,ko01040,ko01100
L-Histidine	156.08	110.07	155.07	[M+H]+	Amino acids and derivatives	8.03346e+06	7.33632e+06	9.36452e+06	1.83863e+07	1.775e+07	16412386	1.54346e+07	1.52966e+07	1.61253e+07	C00135	ko00340,ko00410,ko00470,ko00970,ko01100,ko01110,ko01230,ko02010
Abscisic acid D-glucopyranosyl ester	427.2	247.13	426.189	[M+H]+	Others	207541	145005	183322	578998	495637	356569	305689	307387	291705	-	-
1-Linoleoylglycerol*	355.28	263.24	354.277	[M+H]+	Lipids	245800	234276	248091	250422	284340	317367	260197	247155	259346	-	-
Aromadendrin-7-O-glucoside	449.11	287.06	450.116	[M-H]-	Flavonoids	862342	768052	633007	6.49606e+06	6.38364e+06	5.80069e+06	3.4448e+06	3.33536e+06	3.53135e+06	-	-
Dehydrodiconiferyl alcohol-4-O-glucoside	521.2	131.05	520.194	[M+H]+	Lignans and Coumarins	680691	722382	699933	100994	108402	52920.3	298256	314095	299758	-	-
6'-Hydroxy-4,2',3',4'-Tetramethoxychalcone	345.13	211.06	344.126	[M+H]+	Flavonoids	1.36306e+07	1.44177e+07	1.27215e+07	2.10797e+06	2.1007e+06	2.20142e+06	7.9541e+06	8.30977e+06	8.40313e+06	-	-
LysoPC 20:2*	548.37	184.07	547.364	[M+H]+	Lipids	16076.9	11694.2	11252.7	561285	761696	522947	293304	281345	277569	-	-
3-amino-2-naphthoic acid	188.07	118.06	187.063	[M+H]+	Alkaloids	1.37487e+06	1.50827e+06	1.34412e+06	2.01786e+06	1.92575e+06	1.94502e+06	1.47237e+06	1.54637e+06	1.55153e+06	-	-
1-Octadecanol	269.29	209.23	270.292	[M-H]-	Lipids	632306	593473	617182	589824	591474	585656	568000	597905	597454	-	-
1-α-Linolenoyl-glycerol*	353.27	261.22	352.261	[M+H]+	Lipids	107351	90861.2	117556	394505	413084	518678	159002	150259	156712	-	-
LysoPC 20:1	550.39	184.07	549.379	[M+H]+	Lipids	11370.6	5564.67	8078.28	650055	853397	618428	619866	627537	593291	-	-
cyclo-(Gly-Phe)	205.1	146.06	204.09	[M+H]+	Amino acids and derivatives	1.02946e+07	9.80889e+06	9.39003e+06	1.19733e+07	1.16194e+07	1.09472e+07	1.05902e+07	1.00899e+07	1.06462e+07	-	-
Crepidiaside B	425.18	263.13	424.173	[M+H]+	Terpenoids	246059	186565	188325	847124	915628	852985	433362	414779	410073	-	-
2R-Hydroxyoctadecanoic Acid*	299.26	253.26	300.266	[M-H]-	Lipids	329335	293190	228404	897589	696990	413993	2.97418e+06	2.98222e+06	2.82923e+06	C03042	-
Epigallocatechin	305.07	125.02	306.074	[M-H]-	Flavonoids	319197	382262	288803	684943	815789	1.01616e+06	461470	444090	435674	C12136	ko00941,ko01110
D-Pinitol	193.07	59.01	194.079	[M-H]-	Others	310634	292648	313385	237163	264488	642618	264102	250837	264083	C03844	-
Clove chromone	207.07	121.03	206.058	[M+H]+	Others	4.60995e+06	5.01772e+06	3.85618e+06	217965	201149	174216	2.40723e+06	2.38696e+06	2.27784e+06	-	-
D-Fructose	179.06	59.01	180.063	[M-H]-	Others	9.31012e+06	1.0085e+07	1.00548e+07	9.49105e+06	9.7259e+06	1.03766e+07	8.97368e+06	9.06544e+06	9.48236e+06	C05003	-
Abscisic acid	263.13	204.12	264.136	[M-H]-	Organic acids	1.75171e+06	1.6791e+06	2.06362e+06	753089	911443	702311	1.27814e+06	1.20508e+06	1.23287e+06	C06082	ko00906,ko01100,ko01110,ko04075
N-Palmitoylglycine	312.26	74.03	313.262	[M-H]-	Amino acids and derivatives	430348	334150	419715	611217	415230	462857	539486	516680	509658	-	-
Indole-3-carboxaldehyde	146.06	91.05	145.053	[M+H]+	Alkaloids	2.88707e+07	2.79468e+07	2.6738e+07	3.56536e+07	3.67319e+07	3.42818e+07	2.68414e+07	2.5926e+07	2.7524e+07	C08493	-
Luteolin-3'-O-glucoside*	449.11	287.06	448.101	[M+H]+	Flavonoids	1.66574e+06	1.72987e+06	1.70581e+06	7245025	4.38893e+06	4.4961e+06	3.16449e+06	3.28877e+06	3.10086e+06	-	-
D-Mannose	179.06	59.01	180.063	[M-H]-	Others	8.9115e+06	8.45235e+06	8.2661e+06	8.49931e+06	9.07546e+06	9.11649e+06	7.73767e+06	7.78731e+06	7.36749e+06	C00159	ko00051,ko00052,ko00520,ko01100,ko01250,ko02010
L-Arginine	175.11	70.06	174.112	[M+H]+	Amino acids and derivatives	7.10719e+06	2.00884e+06	9.76316e+06	4.11884e+07	4.57937e+07	4.81748e+07	2.20424e+07	2.25496e+07	2.33965e+07	C00062	ko00220,ko00261,ko00330,ko00470,ko00970,ko01100,ko01110,ko01230,ko02010
5,7-Dimethoxycoumarin (Limettin)(Citropten)	207.07	192.04	206.058	[M+H]+	Lignans and Coumarins	7.41302e+06	8.01671e+06	6.96536e+06	267586	326941	253002	3.63689e+06	3.73535e+06	3.86341e+06	-	-
Undecylic Acid	185.15	185.16	186.162	[M-H]-	Lipids	5.2806e+06	4.99381e+06	4.8199e+06	4.18504e+06	4.47974e+06	4.88744e+06	4.09477e+06	4.31327e+06	4.32436e+06	C17715	-
4'-Hydroxy-5,6,7,8-Tetramethoxyflavone	359.11	329.07	358.105	[M+H]+	Flavonoids	2.75511e+06	2.55047e+06	2.10655e+06	193104	141083	157710	1.25051e+06	1.29604e+06	1.32909e+06	-	-
Sibiricol	259.1	244.08	260.105	[M-H]-	Lignans and Coumarins	2.70917e+06	2.8498e+06	2.5397e+06	5.03687e+06	5.0057e+06	4.89455e+06	3.49778e+06	3.50427e+06	3.31863e+06	-	-
Triethylamine	102.13	58.07	101.12	[M+H]+	Alkaloids	495195	461953	196929	483732	357373	228822	309932	293187	308690	C14691	-
Isodendrocrepine*	575.35	279.2	516.335	[M+CH3COOH-H]-	Alkaloids	350546	278586	411581	983546	1.07121e+06	1.19054e+06	653725	691919	687338	-	-
1-Eicosanol	297.32	183.21	298.324	[M-H]-	Lipids	240222	220938	226668	173316	158323	129622	169244	162727	159305	-	-
5,7,8,3',4'-Pentamethoxyflavanone*	375.14	211.06	374.137	[M+H]+	Flavonoids	1.02979e+07	1.16221e+07	1.06888e+07	1.2097e+06	1.05199e+06	1.05664e+06	5.65281e+06	5.7963e+06	6.01115e+06	-	-
9,10-Epoxyoctadecanoic Acid	297.24	183.01	298.251	[M-H]-	Lipids	1.18888e+06	931486	994862	799177	814340	801369	865602	913231	914648	C19418	ko00073
7,8-Dihydrofurocoumarin	189.05	131.05	188.047	[M+H]+	Lignans and Coumarins	1.05907e+07	2.41796e+07	2.20108e+07	429064	686625	477355	5.84434e+06	6.18766e+06	5.88858e+06	-	-
Homoeriodictyol	303.09	153.02	302.079	[M+H]+	Flavonoids	6.30017e+06	4.99402e+06	6.81371e+06	1.86139e+07	1.80165e+07	1.91325e+07	1.21377e+07	1.15355e+07	1.14742e+07	C09756	ko00941
LysoPC 18:0	524.37	184.07	523.364	[M+H]+	Lipids	177718	122208	129169	1.58515e+06	2.26708e+06	1.06723e+06	6.22852e+06	6.52069e+06	6.14409e+06	-	-
3-Hydroxyurs-12-en-28-oic acid (Ursolic acid)	455.35	455.35	456.36	[M-H]-	Terpenoids	87825.5	71266	184714	308453	339795	333739	191914	190166	201609	C08988	-
2,3-Dihydroxyolean-12-en-28-oic acid (2-Hydroxyoleanolic acid)*	471.35	471.35	472.355	[M-H]-	Terpenoids	537861	582771	568776	631898	610868	635084	416561	436524	442989	-	-
2-Hydroxyursolic acid*	471.35	471.35	472.355	[M-H]-	Terpenoids	537861	582771	568776	631898	610868	635084	416561	436524	442989	-	-
D-Glucose	179.06	59.01	180.063	[M-H]-	Others	9.51874e+06	1.05068e+07	9.27224e+06	9.59611e+06	9.92659e+06	1.08609e+07	9.05046e+06	9.38691e+06	8.80698e+06	C00031	ko00010,ko00030,ko00052,ko00500,ko00520,ko01100,ko01110,ko02010
Natsudaidain (3-Hydroxy-3',4',5,6,7,8-hexamethoxyflavone)	417.12	402.1	418.126	[M-H]-	Flavonoids	2.97722e+06	2.78629e+06	2.76458e+06	257851	267071	298122	1.53686e+06	1.48881e+06	1.44058e+06	-	-
2-Aminopurine	136.06	119.04	135.054	[M+H]+	Nucleotides and derivatives	4.09987e+06	3.12786e+06	4.74766e+06	5.15629e+06	5.86617e+06	6.24626e+06	4.77383e+06	4.58813e+06	4.47811e+06	-	-
5-Glucosyloxy-2-Hydroxybenzoic acid methyl ester	329.09	167.04	330.095	[M-H]-	Phenolic acids	1.29781e+06	1.66011e+06	1.41936e+06	1.76462e+06	1.95532e+06	1.85195e+06	1.47824e+06	1.57765e+06	1.52567e+06	-	-
(S)-Murpanidin	277.11	189.05	276.1	[M+H]+	Lignans and Coumarins	3.86909e+06	3.49282e+06	4.18104e+06	89479.4	92190.8	69866.5	2.29523e+06	2.17477e+06	2.16648e+06	-	-
3',4',5,7-Tetramethoxyflavone; Luteolin Tetramethyl Ether	343.12	327.09	342.11	[M+H]+	Flavonoids	8.97238e+06	9.2902e+06	9.09505e+06	1.01645e+06	919226	1.01198e+06	5.46024e+06	5.6419e+06	5.8286e+06	-	-
3-Hydroxy-5,7,8-trimethoxyflavone*	329.1	314.07	328.095	[M+H]+	Flavonoids	2.64277e+06	2.7473e+06	2.22777e+06	452665	427910	436586	1.33237e+06	1.24792e+06	1.28898e+06	-	-
LysoPC 18:0(2n isomer)	524.37	184.07	523.364	[M+H]+	Lipids	13915.2	14132.2	7145.79	1.03788e+06	1.32276e+06	1.00796e+06	743898	720012	769076	-	-
3,4,2',4',6'-Pentahydroxychalcone-4'-O-glucoside	449.11	287.06	450.116	[M-H]-	Flavonoids	343249	432689	417697	136515	138825	119908	203007	216906	210541	C16408	ko00941,ko01110
6-C-Glucosyl-2-Hydroxynaringenin	449.11	269.05	450.116	[M-H]-	Flavonoids	564482	676623	688372	4.92914e+06	4.84551e+06	5.37361e+06	2.85303e+06	2.71303e+06	2.89245e+06	-	-
LysoPC 18:2(2n isomer)	520.34	184.07	519.332	[M+H]+	Lipids	1.92613e+06	940156	1.29539e+06	2.5263e+07	3.2774e+07	2.66562e+07	1.32725e+07	1.36928e+07	1.28053e+07	-	-
LysoPC 20:2(2n isomer)*	548.37	184.07	547.364	[M+H]+	Lipids	18568	9064.39	12438.6	523247	697466	533175	291837	276696	274469	-	-
L-Phenylalanine	166.09	120.08	165.079	[M+H]+	Amino acids and derivatives	1.85093e+06	2.03778e+06	1.90564e+06	2.64624e+06	2.75039e+06	2.70361e+06	2.16042e+06	2.30649e+06	2.20348e+06	C00079	ko00360,ko00400,ko00460,ko00470,ko00940,ko00960,ko00966,ko00970,ko00996,ko00999,ko01100,ko01110,ko01210,ko01230,ko02010
D-Ribose	149.05	75.01	150.053	[M-H]-	Others	2.8855e+06	2.42331e+06	2.63457e+06	2.41572e+06	2.80582e+06	2.68938e+06	1.89272e+06	1.87288e+06	1.99386e+06	C00121	ko00030,ko01100,ko02010
2-Methylsuccinic acid*	131.03	87.05	132.042	[M-H]-	Organic acids	461372	497718	519721	517338	778500	1.73637e+06	582909	623313	599035	-	-
3-Guanidinopropionic acid	130.05	88.04	131.07	[M-H]-	Organic acids	49667.3	88849.6	99024.8	143421	202904	261692	159410	167310	156831	C03065	-
Eriodictyol-8-C-glucoside	449.11	287.06	450.116	[M-H]-	Flavonoids	400497	428853	380654	3.85115e+06	3.06047e+06	3.4082e+06	1.76202e+06	1.86651e+06	1.87269e+06	-	-
Argininosuccinic acid	289.12	131.08	290.123	[M-H]-	Organic acids	45988.9	44986.4	43289.7	200472	191124	194909	108120	111636	104308	C03406	ko00220,ko00250,ko01100,ko01110,ko01230
L-Lysine	147.11	84.08	146.106	[M+H]+	Amino acids and derivatives	8.91328e+06	7.28688e+06	9.3875e+06	2.03961e+07	1.86605e+07	1.99107e+07	1.71109e+07	1.59908e+07	1.67025e+07	C00047	ko00300,ko00310,ko00470,ko00780,ko00960,ko00970,ko01100,ko01110,ko01210,ko01230,ko02010
Pyridoxine	170.08	134.06	169.074	[M+H]+	Others	6.88748e+06	6.13676e+06	6.07142e+06	5.84652e+06	6.82092e+06	6.71698e+06	5.21613e+06	5.41465e+06	5.585e+06	C00314	ko00750,ko01100,ko01240
Arachidic acid	311.3	311.3	312.303	[M-H]-	Lipids	16111292	9.08436e+06	9.24313e+06	5.92477e+06	5.74406e+06	4.90852e+06	8.3539e+06	8.68402e+06	8.11368e+06	C06425	ko01040
3-O-p-Coumaroylshikimic acid-O-glucoside	481.14	319.3	482.142	[M-H]-	Phenolic acids	24600.7	11636	19390.3	186722	214464	192402	74979.5	72890.6	78025.1	-	-
4'-hydroxy-5,7,3',5'-pentamethoxyfavone*	389.12	359.08	388.116	[M+H]+	Flavonoids	1.59274e+07	1.38431e+07	1.49389e+07	624788	580443	578115	8.12025e+06	8.53897e+06	8.67643e+06	-	-
LysoPI 18:3	593.27	315.05	594.28	[M-H]-	Lipids	329880	284161	313386	688766	814723	751368	367773	375478	393290	-	-
Xanthotoxol; 8-Hydroxypsoralen	203.03	147.05	202.027	[M+H]+	Lignans and Coumarins	693512	614321	708102	6.35062e+06	7.63458e+06	8.17089e+06	1.72344e+06	1.61995e+06	1.62917e+06	C00841	ko00999,ko01110
4-Methoxy-2,3-dihydrofuro[3,2-g]chromen-7-one	219.06	161.06	218.058	[M+H]+	Lignans and Coumarins	2.408e+06	2.24684e+06	2.03498e+06	29562	55585.4	76482	1.25993e+06	1.23038e+06	1.17655e+06	-	-
2,6-Dimethyl-7-octene-2,3,6-triol	187.13	97.06	188.141	[M-H]-	Others	747857	911322	746428	927619	853341	916526	702430	738505	691334	-	-
7-Demethyltangeretin	359.11	344.09	358.105	[M+H]+	Flavonoids	806420	870641	844420	35595.4	40134.6	38188.7	239891	257187	249144	-	-
Quercetin-3-O-sophoroside (Baimaside)	627.16	303.06	626.148	[M+H]+	Flavonoids	226884	250478	262898	296066	447200	263976	235988	247373	252749	C12667	ko00944,ko01110
2-α-Linolenoyl-glycerol*	353.27	261.22	352.261	[M+H]+	Lipids	93175.9	90493.6	116005	388451	384163	504066	157384	153756	146889	-	-
L-Xylose	149.05	59.02	150.053	[M-H]-	Others	745887	777263	778916	585473	538779	617036	555426	518632	530656	C01510	-
Isorhamnetin-3-O-sophoroside-7-O-rhamnoside*	787.23	317.07	786.222	[M+H]+	Flavonoids	3.48971e+06	3.53919e+06	3.37976e+06	2.66186e+06	2.91348e+06	2.75625e+06	2.80549e+06	2.949e+06	3.00465e+06	-	-
LysoPE 18:3(2n isomer)*	476.28	335.26	475.27	[M+H]+	Lipids	89713.2	51534.6	69927.6	559381	678863	632583	373185	370260	394738	-	-
3',5-Dihydroxy-4',6,7-Trimethoxyflavanone	347.11	197.05	346.105	[M+H]+	Flavonoids	162515	120222	128178	21544.8	10369.3	18815.7	90852.2	85370.4	90802.5	-	-
Quercetin-3-rutinoside-7-galactoside	773.21	303.05	772.206	[M+H]+	Flavonoids	47170.5	77948.9	72185.6	240479	315684	190153	154045	164658	162888	-	-
Salidroside	299.11	137.02	300.121	[M-H]-	Phenolic acids	1.36765e+06	1.97525e+06	2.40906e+06	33909.9	32757.7	27917.1	1.34623e+06	1.27059e+06	1.2636e+06	C06046	ko00350,ko01100
Uridine	243.06	110.02	244.07	[M-H]-	Nucleotides and derivatives	878010	1.16311e+06	1.15059e+06	1.81864e+06	1.74617e+06	2.86427e+06	1.53558e+06	1.47701e+06	1.43065e+06	C00299	ko00240,ko01100,ko01232,ko02010
LysoPC 17:1	508.34	184.07	507.332	[M+H]+	Lipids	46310.2	18423.5	45722.8	676946	992921	574685	211783	202269	197574	-	-
2-Dodecenedioic acid	227.13	183.14	228.136	[M-H]-	Lipids	1.21458e+06	1.04274e+06	1.05504e+06	1.10607e+06	1.08731e+06	984566	962472	980975	915321	C16308	ko00592,ko01110
Hydroxyicosanoic Acid	327.29	59.01	328.298	[M-H]-	Lipids	401189	321811	314614	31567.2	36078.2	23364.8	265880	247602	256134	-	-
3,5,6,7,3',4'-Hexamethoxyflavone	403.14	373.09	402.132	[M+H]+	Flavonoids	1.07965e+06	980580	892170	58124.7	64790.3	58345.3	447273	447629	420356	-	-
Phenylpropionic acid-O-β-D-glucopyranoside	325.09	119.05	326.1	[M-H]-	Phenolic acids	259319	251487	215426	152888	122027	151187	220460	222649	235405	-	-
O-Feruloyl coumarin	323.09	177.05	322.084	[M+H]+	Lignans and Coumarins	525876	320629	427858	251068	196231	230804	309639	288852	304005	-	-
Inositol	179.05	59.01	180.063	[M-H]-	Others	1.39717e+07	1.06045e+07	1.03202e+07	1.07945e+07	1.06664e+07	1.06899e+07	9.49288e+06	9.95683e+06	9.28731e+06	C00137	ko00052,ko00053,ko00562,ko01100,ko01110,ko01250,ko02010,ko04070
5-Hydroxy-6,7,3',4',5'-Pentamethoxyflavone	389.12	359.08	388.116	[M+H]+	Flavonoids	2.8898e+06	3.13173e+06	3.19957e+06	1.36658e+06	1.36461e+06	1.15216e+06	2.16494e+06	2.07855e+06	2.2344e+06	-	-
5,4'-Dihydroxy-3,7-dimethoxyflavone(Kumatakenin)	315.09	300.06	314.079	[M+H]+	Flavonoids	755602	723002	686528	672398	587987	705295	662968	639727	688143	-	-
4'-Hydroxy-5,6,7-trimethoxyflavone	329.1	268.08	328.095	[M+H]+	Flavonoids	1.42567e+07	1.28177e+07	1.19901e+07	1.6391e+06	1.49305e+06	1.60802e+06	7.28444e+06	7.50622e+06	6.97758e+06	C14986	-
Dihydrocaffeoylputrescine	253.15	165.05	252.147	[M+H]+	Alkaloids	68656.3	78411.1	69381	100296	91243.7	89967.8	73706.1	74762.1	69709.2	-	-
3,4-Dimethoxyphenyl acetic acid	195.07	121.03	196.074	[M-H]-	Phenolic acids	47511.8	35552.7	70626.2	39872.4	21338	43237.1	38516.9	40525.9	37761.6	-	-
Methyl 3-aminopropanoate	104.07	59.01	103.063	[M+H]+	Amino acids and derivatives	6.65135e+06	6.88429e+06	6.41026e+06	7.0845e+06	7.40528e+06	7.35019e+06	7.07075e+06	6.5817e+06	6.73391e+06	-	-
Xanthotoxin; 8-Methoxypsoralen	217.05	202.02	216.042	[M+H]+	Lignans and Coumarins	550755	568033	582014	3.18595e+07	3.21794e+07	2.74759e+07	1.25535e+07	1.19812e+07	1.16758e+07	C01864	ko00999,ko01110
3,4-Dihydroxybenzoic acid (Protocatechuic acid)*	153.02	109.03	154.027	[M-H]-	Phenolic acids	6.42848e+06	6.78772e+06	7.38902e+06	2.6275e+06	2.5149e+06	2.57846e+06	3.59758e+06	3.85175e+06	3.82133e+06	C00230	ko01100,ko01110
LysoPC 15:1	480.31	184.07	479.301	[M+H]+	Lipids	31240.3	30465.4	31579.3	346056	603213	457546	178048	177989	166857	-	-
Hydroxyauranetin 5-O-Glucoside	551.17	389.12	550.169	[M+H]+	Flavonoids	325039	344736	384192	107788	104349	94007.3	181129	179713	169113	-	-
Dihydrocaffeoylglucose	343.1	181.05	344.111	[M-H]-	Phenolic acids	1.43671e+07	1.28348e+07	1.37204e+07	1.00286e+07	1.06365e+07	7.98409e+06	1.22556e+07	1.26054e+07	1.17016e+07	-	-
1-O-(3,4-Dihydroxy-5-methoxy-benzoyl)-glucoside	345.08	139.04	346.09	[M-H]-	Phenolic acids	2.31217e+06	3.00619e+06	2.52318e+06	1.45186e+06	1.5584e+06	1.64537e+06	1.76902e+06	1.82211e+06	1.69112e+06	-	-
9,10,13-Trihydroxy-11-Octadecenoic Acid	329.23	229.15	330.241	[M-H]-	Lipids	2.67859e+06	1.48155e+06	2.60357e+06	8.44864e+06	8.51281e+06	5.39213e+06	4.89281e+06	4.58138e+06	4.59398e+06	C14835	ko00591
Diosmetin (5,7,3'-Trihydroxy-4'-methoxyflavone)*	299.06	284.03	300.063	[M-H]-	Flavonoids	5.77764e+06	5.78894e+06	5.18281e+06	2.58449e+06	2.37541e+06	2.65842e+06	4.60501e+06	4.3573e+06	4.68593e+06	C10038	-
13S-Hydroperoxy-6Z,9Z,11E-octadecatrienoic acid	309.21	209.05	310.214	[M-H]-	Lipids	526751	571985	659358	654521	759621	647947	626718	638814	593637	-	-
Dihydrobungeanool	294.24	95.08	293.236	[M+H]+	Alkaloids	100986	110753	98376.1	224782	189488	212281	123291	123959	115684	-	-
Esculetin-7-O-glucoside*	339.07	177.02	340.079	[M-H]-	Lignans and Coumarins	886077	999389	1.40708e+06	5.21444e+06	4.98621e+06	4.60401e+06	3.05909e+06	3.29612e+06	3.13807e+06	-	-
Methoxyindoleacetic acid	206.08	145.05	205.074	[M+H]+	Alkaloids	1.30931e+07	1.23872e+07	1.18508e+07	1.39467e+07	1.5381e+07	1.49635e+07	1.19908e+07	1.25442e+07	1.29398e+07	C05660	ko00380
2,6-Di-tert-butylphenol	205.16	189.13	206.167	[M-H]-	Phenolic acids	1.24671e+06	1.06086e+06	1.09744e+06	312282	297440	313025	597430	611553	643536	-	-
D-Arabinose	149.05	59.01	150.053	[M-H]-	Others	809204	754437	885451	660980	622960	717107	511766	508372	544564	C00216	ko00040,ko00053,ko00520,ko01100,ko01250
Eupatilin-7-O-glucoside	507.15	345.09	506.142	[M+H]+	Flavonoids	463442	463986	472273	23911.9	29604.4	17072.3	332495	327322	308946	-	-
Dihydromyricetin (Ampelopsin)	319.05	301.04	320.053	[M-H]-	Flavonoids	83964.5	85972.3	112223	546426	504409	699789	292646	300620	278593	C02906	ko00941,ko01110
Gallacetophenone	169.05	65.03	168.042	[M+H]+	Phenolic acids	222538	134299	146304	50493.4	73374.8	58347.4	97730.5	92216.8	99255.2	-	-
Menatetrenone (Vitamin K2)	445.31	341.28	444.303	[M+H]+	Others	259078	248838	240907	232618	229806	239939	226709	242494	227307	-	-
Adenosine 5'-monophosphate	348.07	136.06	347.063	[M+H]+	Nucleotides and derivatives	27110.4	18663.7	23510.3	63479.5	73131	53983.1	47062	43889.2	44248.8	C00020	ko00230,ko00908,ko01100,ko01110,ko01232,ko01240
5-Methylcytosine	126.07	109.04	125.059	[M+H]+	Nucleotides and derivatives	272611	193661	185658	288042	249690	295804	240112	233189	251692	C02376	ko00240,ko01100
(E)-Ethyl p-methoxycinnamate	207.1	161.06	206.094	[M+H]+	Phenolic acids	1.19735e+06	1.35008e+06	1.38443e+06	7789.71	2598.7	4062.91	695756	643861	672766	-	-
LysoPC 17:0(2n isomer)*	510.36	184.07	509.348	[M+H]+	Lipids	67647.2	53227.4	63949.6	2.57001e+06	3.1123e+06	2.54376e+06	1.5791e+06	1.64335e+06	1.52073e+06	-	-
3,4-Dimethoxycinnamic acid	207.07	133.07	208.074	[M-H]-	Phenolic acids	511049	424031	403150	184108	184495	145053	325882	337416	312183	-	-
Dihydroxypentamethoxyflavone	405.12	375.07	404.111	[M+H]+	Flavonoids	487814	397748	368805	254943	200398	192392	314947	337649	336580	-	-
palmitic amide	256.26	102.09	255.256	[M+H]+	Others	1.47567e+07	1.24565e+07	1.27246e+07	9.30196e+06	1.00171e+07	7.9341e+06	1.6078e+07	1.53796e+07	1.48832e+07	-	-
13(S)-HODE;13(S)-Hydroxyoctadeca-9Z,11E-dienoic acid*	295.23	195.14	296.235	[M-H]-	Lipids	1.4516e+07	1.40202e+07	1.41935e+07	2.19578e+07	2.13776e+07	2.21567e+07	1.59536e+07	1.69897e+07	1.71582e+07	C14762	ko00591
Vanillic acid	167.03	108.02	168.042	[M-H]-	Phenolic acids	1.95588e+06	1.79936e+06	1.81155e+06	3.2808e+06	3.24813e+06	4.10503e+06	2.4373e+06	2.27957e+06	2.4452e+06	C06672	-
p-Coumaroylmalic acid	279.05	163.04	280.058	[M-H]-	Phenolic acids	1.00725e+06	1.01267e+06	1.27811e+06	3.04917e+06	2.64297e+06	2.89662e+06	1.83079e+06	1.69261e+06	1.76318e+06	-	-
ZP-amide A	296.19	83.05	295.178	[M+H]+	Alkaloids	14501.6	11290.9	21870.4	80771.6	86872.9	80925.4	37971.6	36099	35168.1	-	-
Muconic acid	141.02	59.01	142.027	[M-H]-	Organic acids	2.86352e+06	3.01317e+06	3.29579e+06	2.98081e+06	2.98527e+06	2.83936e+06	3.02731e+06	3.19863e+06	3.26866e+06	C02480	ko01100
9S-Hydroxy-10E,12Z-octadecadienoic acid*	295.23	195.14	296.235	[M-H]-	Lipids	1.23826e+07	1.36231e+07	1.22991e+07	2.05053e+07	2.0262e+07	1.90416e+07	1.50031e+07	1.6057e+07	1.50092e+07	C14767	ko00591
6-O-Glucosyl-feruloylbenzoic acid	459.13	337.09	460.137	[M-H]-	Phenolic acids	106025	89419.6	83646.6	33768.9	32929.6	42403.8	54436	56143.4	51885.5	-	-
Piperidine	86.1	69.07	85.0891	[M+H]+	Alkaloids	2.16728e+06	1.34186e+06	1.55771e+06	2.45149e+06	2.83093e+06	2.35415e+06	2.18748e+06	2.08604e+06	2.25809e+06	C01746	ko00960
3',4'-Dihydroxy-5,6,7,8,5'-Pentamethoxyflavone*	405.12	375.07	404.111	[M+H]+	Flavonoids	936303	599031	523604	80759.4	72926.2	98917	445640	457293	422741	-	-
5,7-Dihydroxy-3,6,8,3',4'-Pentamethoxyflavone*	405.12	375.07	404.111	[M+H]+	Flavonoids	936303	599031	523604	80759.4	72926.2	98917	445640	457293	422741	-	-
D-Glucose 6-phosphate*	259.02	96.97	260.03	[M-H]-	Others	257443	248852	265229	813060	745156	770320	504552	525064	484272	C00092	ko00500,ko00562,ko01100,ko01110
1-O-Salicyloyl-β-D-glucose	299.08	137.02	300.084	[M-H]-	Phenolic acids	1.45515e+06	2.08444e+06	2.62621e+06	75184.3	70228.3	64240	1.22321e+06	1.29535e+06	1.32361e+06	-	-
Isorhamnetin-3-O-(2''-O-xylosyl)glucoside	611.16	317.06	610.153	[M+H]+	Flavonoids	305747	286103	302495	36680	33878.5	16643.3	124040	134432	128085	-	-
Curcurbitacin IIA	561.34	59.01	562.351	[M-H]-	Terpenoids	142768	139521	141441	13426.6	14851.5	13474.6	68094.2	63468.1	63557.3	-	-
3-hydroxybenzaldehyde	123.04	77.04	122.037	[M+H]+	Phenolic acids	1.82654e+06	5.19628e+06	5.31455e+06	1.43866e+06	2.03477e+06	367322	3.05212e+06	3.07938e+06	3.28736e+06	C03067	-
Oxiglutatione	611.14	306.08	612.152	[M-H]-	Amino acids and derivatives	97744.6	88806.2	81550.5	248450	242974	198282	200364	199666	186094	C00127	ko00480,ko01100,ko01240
7-Hydroxycoumarin;Umbelliferone	161.02	133.03	162.032	[M-H]-	Lignans and Coumarins	5.78246e+06	6.54818e+06	5.61968e+06	1.00889e+07	1.13539e+07	8.9713e+06	6.74893e+06	7.25113e+06	6.76616e+06	C09315	ko00999,ko01110
xanthoxyletin	259.1	229.05	258.089	[M+H]+	Lignans and Coumarins	17103.7	15125.9	18291.9	479024	453082	456402	172049	167146	181243	-	-
D-Glucoronic acid*	193.04	72.99	194.043	[M-H]-	Others	158222	142376	173779	103890	84557.8	98023.8	102224	110535	109112	C00191	ko00040,ko00053,ko00520,ko00562,ko01100,ko01240,ko01250
N-Feruloylagmatine	307.18	177.05	306.169	[M+H]+	Alkaloids	4.19131e+07	5.08486e+07	4.69145e+07	1.03338e+07	1.24736e+07	1.17727e+07	2.66631e+07	2.78175e+07	2.56038e+07	C18325	ko00330,ko01100
Limocitrin-3-O-arabinoside	479.12	347.07	478.111	[M+H]+	Flavonoids	1.28803e+07	1.21331e+07	2.11842e+07	4.24584e+06	2.91365e+06	3.84058e+06	1.78746e+07	1.65079e+07	1.68571e+07	-	-
ulopterol	279.11	207.05	278.115	[M+H]+	Lignans and Coumarins	29699.3	36073.5	30708.9	14164.9	16710.4	10866.2	24188.9	24883.6	26245.9	-	-
Isorhamnetin-3-O-rutinoside-4'-O-glucoside*	787.23	317.06	786.222	[M+H]+	Flavonoids	4.0945e+06	3.10355e+06	3.69937e+06	2.93352e+06	3.19859e+06	1.80897e+06	3.28521e+06	3.14734e+06	3.42171e+06	-	-
Tryptamine	161.11	144.08	160.1	[M+H]+	Alkaloids	2.39345e+07	1.51997e+07	2.05183e+07	1.68172e+07	7.23378e+06	1.40955e+07	1.3142e+07	1.42874e+07	1.38121e+07	C00398	ko00380,ko01100,ko01110
Apigenin-6-C-xyloside-8-C-arabinoside	535.14	517.13	534.137	[M+H]+	Flavonoids	81744.5	81628.3	94628.5	25005	27505	16159.3	61008.1	60234.5	65074.8	-	-
Cadaverine	103.12	86.1	102.116	[M+H]+	Alkaloids	69152.2	59219.7	90975.1	55185.6	52538.2	80745.1	75182.5	70270.6	69720.6	C01672	ko00310,ko00470,ko00480,ko00960,ko01100,ko01110
Hexadecylsphingosine	274.27	256.27	273.267	[M+H]+	Lipids	1.56864e+06	1.6176e+06	1.68911e+06	1.67182e+06	1.38951e+06	1.76457e+06	2.08375e+06	1.92465e+06	1.95915e+06	-	-
12-Oxo-phytodienoic acid	291.2	235.17	292.204	[M-H]-	Lipids	293912	277347	303095	246492	230445	225794	223302	231666	242817	C01226	ko00592,ko01100,ko01110
Isosinensetin	373.13	343.08	372.121	[M+H]+	Flavonoids	1.63407e+06	1.80584e+06	1.65536e+06	40170.5	37303.9	35182.5	884912	825550	821407	-	-
Tetrahydrobungeanool	296.26	207.17	295.251	[M+H]+	Alkaloids	7353.62	7869.7	7170.16	15338.4	16241.8	15651.5	11523.5	10710	10729.9	-	-
Ailanindole	213.07	167.06	212.059	[M+H]+	Alkaloids	1.19897e+06	1.29028e+06	620136	1.60418e+06	1.63018e+06	1.94063e+06	1.2068e+06	1.28836e+06	1.30792e+06	-	-
Ricinoleic acid	297.24	183.14	298.251	[M-H]-	Lipids	445390	380306	367925	309688	290379	258211	286708	306086	310766	C08365	-
13(s)-hydroperoxy-(9z,11e,15z)-octadecatrienoic acid	309.2	227.2	310.214	[M-H]-	Lipids	288850	516173	515216	188642	275806	250320	407468	374300	390949	C04785	ko00592,ko01100,ko01110
Isohemiphloin	433.11	313.07	434.121	[M-H]-	Flavonoids	516857	498276	531022	405769	415242	467625	412629	387383	420541	-	-
LysoPC 18:3*	518.32	184.07	517.317	[M+H]+	Lipids	606312	255331	407990	5.41755e+06	8.45606e+06	6.58303e+06	2.8731e+06	2.70809e+06	2.64641e+06	-	-
3-Hydroxyoctadecanoic Acid	299.26	299.26	300.266	[M-H]-	Lipids	1.21843e+06	865515	275880	553545	517203	525171	627457	660746	606954	-	-
sorbose	179.06	59.01	180.063	[M-H]-	Others	9.9391e+06	9.48008e+06	9.48125e+06	1.0372e+07	1.00245e+07	1.02062e+07	8.60387e+06	9.27432e+06	8.62529e+06	-	-
1-O-Feruloyllysine	323.16	177.06	322.153	[M+H]+	Alkaloids	4.84459e+06	5.55496e+06	3.62992e+06	1.233e+06	971992	1.11062e+06	2.25074e+06	2.39842e+06	2.44656e+06	-	-
LysoPC 17:0*	510.36	184.07	509.348	[M+H]+	Lipids	149671	61464.3	104182	1.65563e+06	2.08964e+06	1.31036e+06	1.90534e+06	1.75797e+06	1.88479e+06	-	-
5S,8R-DiHODE; (5S,8R,9Z,12Z)-5,8-Dihydroxyoctadeca-9,12-dienoate	311.22	223.17	312.23	[M-H]-	Lipids	306977	273388	267804	505632	456002	488684	344026	335533	364823	C20186	ko00591
Butin-7-O-glucoside*	433.11	271.06	434.121	[M-H]-	Flavonoids	1.08132e+07	1.25757e+07	1.24564e+07	6.95222e+06	5.87621e+06	6.71817e+06	1.14944e+07	1.22233e+07	1.25157e+07	-	-
Cyclic 3',5'-Adenylic acid	328.05	134.05	329.053	[M-H]-	Nucleotides and derivatives	372419	397851	393346	633107	570873	629439	518972	525775	484364	C00575	ko00230,ko01100
5,7-Dihydroxy-3',4',5'-trimethoxyflavone	345.1	284.07	344.09	[M+H]+	Flavonoids	2.22796e+07	2.31233e+07	2.25795e+07	1.0391e+07	1.0547e+07	9.94214e+06	1.73306e+07	1.58849e+07	1.67171e+07	C19807	-
Coniferin	341.12	179.07	342.132	[M-H]-	Phenolic acids	690021	722555	760741	486693	498636	425566	671855	710323	732686	C00761	ko00940,ko01110
2-Dehydro-3-deoxy-L-arabinonate	147.03	57.03	148.037	[M-H]-	Others	921730	801716	893480	1.04258e+06	1.23644e+06	1.24851e+06	929498	861644	931529	C00684	ko00053,ko01100
Methyl 2,4-dihydroxyphenylacetate	181.05	135.04	182.058	[M-H]-	Phenolic acids	162932	96474.3	132507	227172	185642	251288	156967	150763	143734	-	-
Vidarabine	268.11	136.06	267.097	[M+H]+	Nucleotides and derivatives	1.28451e+07	1.11431e+07	1.2641e+07	1.90538e+07	1.50865e+07	1.65242e+07	1.4178e+07	1.33715e+07	1.30167e+07	-	-
Histidinol	142.1	124.09	141.09	[M+H]+	Alkaloids	4.01262e+07	3.87797e+07	4.01785e+07	4.93151e+07	4.94604e+07	5.07307e+07	4.11776e+07	4.35288e+07	44950461	C00860	ko00340,ko01100,ko01110,ko01230
N-Acetyl-L-tyrosine	224.09	136.08	223.084	[M+H]+	Amino acids and derivatives	274446	244217	285060	659284	582116	627865	495783	454514	469608	-	-
7-Hydroxy-3',4',5,6-tetramethoxyflavone*	359.11	344.09	358.105	[M+H]+	Flavonoids	2.41722e+06	1.64698e+06	2.47561e+06	86869.1	80564.5	89903.4	1.10182e+06	1.20102e+06	1.17425e+06	-	-
Kaempferol-3-O-glucoside (Astragalin)*	449.11	287.06	448.101	[M+H]+	Flavonoids	892505	1.95234e+06	727505	7775235	9205930	8071905	3.69261e+06	3.70783e+06	3423705	C12249	ko00944,ko01110
13S-Hydroperoxy-9Z,11E-octadecadienoic acid	311.22	171.14	312.23	[M-H]-	Lipids	1.64455e+06	1.69475e+06	1.64923e+06	4.20407e+06	3.92892e+06	4.31718e+06	2.59678e+06	2.44643e+06	2.38283e+06	C04717	ko00591,ko01100
Diosmetin-8-C-(2''-O-rhamnosyl)glucoside	609.18	445.11	608.174	[M+H]+	Flavonoids	280604	255139	311150	312450	397505	261655	247279	227791	230962	-	-
N-benzylformamide	136.07	91.05	135.068	[M+H]+	Alkaloids	9.37528e+06	7.56058e+06	7.47946e+06	1.18458e+07	1.62587e+07	1.18842e+07	9.93149e+06	9.92108e+06	1.07146e+07	C15561	-
Evodinnol	249.11	193.05	248.105	[M+H]+	Others	31333.9	28199.6	31457.1	34815.5	28046.8	31111.6	21421.2	22519.6	23432	-	-
Sinapic acid	223.06	193.02	224.069	[M-H]-	Phenolic acids	76420.8	83582.9	114630	111307	97420.4	83619.6	100158	94140.8	91884.3	C00482	ko00940,ko01100,ko01110
Nobiletin (5,6,7,8,3',4'-Hexamethoxyflavone)*	403.14	373.1	402.132	[M+H]+	Flavonoids	5.91676e+06	5.76861e+06	6.3431e+06	1.25644e+06	1.32655e+06	1.18515e+06	3.2725e+06	3.53245e+06	3.55454e+06	C10112	-
Decursinol	247.09	229.09	246.089	[M+H]+	Lignans and Coumarins	2.20105e+07	2.40679e+07	1.7775e+07	1.52562e+06	1.55046e+06	1.85589e+06	1.44796e+07	1.35613e+07	1.32839e+07	C09259	-
Homoarginine	189.13	144.1	188.127	[M+H]+	Amino acids and derivatives	128076	216394	245579	597803	535359	300504	373250	393690	359653	C01924	-
Cedrelopsin	261.11	189.06	260.105	[M+H]+	Lignans and Coumarins	6.99064e+07	7.53851e+07	7.28111e+07	353501	951060	236177	4.14614e+07	4.03097e+07	3.78858e+07	-	-
1-Decanol*	157.16	157.16	158.167	[M-H]-	Others	5.30638e+06	5.41808e+06	4.89982e+06	3.71288e+06	4.00142e+06	4.24279e+06	4.20503e+06	4.55657e+06	4.22255e+06	C01633	-
Demethoxysudachitin	331.08	316.09	330.074	[M+H]+	Flavonoids	1.23065e+07	1.09957e+07	1.21867e+07	1.43111e+06	1.54673e+06	1.38237e+06	7.55968e+06	7.32717e+06	6.90142e+06	-	-
Esculin (6,7-Dihydroxycoumarin-6-O-glucoside)*	339.07	177.02	340.079	[M-H]-	Lignans and Coumarins	1.46929e+06	1.68543e+06	2.6457e+06	1.09215e+07	1.13269e+07	1.18692e+07	6.09757e+06	6.07295e+06	5.61248e+06	C09264	-
Dihydrokaempferol-7-O-glucoside	449.11	287.06	450.116	[M-H]-	Flavonoids	2.26555e+06	3.48951e+06	3.09698e+06	776659	713727	610519	1.6769e+06	1794925	1.83334e+06	-	-
2-Phenylethanol	105.07	77.04	122.073	[M-H2O+H]+	Phenolic acids	2.0661e+07	1.95875e+07	2.01532e+07	6.76144e+06	6.64528e+06	6.62048e+06	9.87923e+06	1.05135e+07	1.08224e+07	C05853	ko00360
N-Acetyl-D-galactosamine	222.1	84.05	221.09	[M+H]+	Others	1.0115e+06	941461	1.09047e+06	1.30721e+06	1.1632e+06	1.23663e+06	1.07163e+06	1.16374e+06	1.07923e+06	C01132	ko00052,ko00520,ko01100,ko01250
7-hydroxy-2H-1-benzopyran-2-one	163.04	89.04	162.032	[M+H]+	Lignans and Coumarins	3.2505e+06	3.65304e+06	3.95817e+06	1.98151e+06	1.94436e+06	1.5606e+06	2.69589e+06	2.46922e+06	2.6549e+06	-	-
N-benzoyl-2-aminoethyl-β-D-glucopyranoside	328.13	310.12	327.132	[M+H]+	Alkaloids	1.63471e+07	1.53786e+07	1.45762e+07	3.40509e+07	3.3839e+07	3.3805e+07	2.4908e+07	2.39679e+07	2.27029e+07	-	-
Adenosine	268.1	136.06	267.097	[M+H]+	Nucleotides and derivatives	1.30297e+07	1.1743e+07	1.23778e+07	1.90785e+07	1.78694e+07	1.90869e+07	1.4571e+07	1.39513e+07	1.32783e+07	C00212	ko00230,ko01100,ko01232,ko02010
Retusin 7-O-Glucoside	521.17	359.11	520.158	[M+H]+	Flavonoids	7324820	2.66189e+06	2.48521e+06	410860	391795	837505	1.49738e+06	1.59252e+06	1.45496e+06	-	-
Mikanin	345.1	312.06	344.09	[M+H]+	Flavonoids	1.5574e+07	1.55297e+07	1.61379e+07	7.67084e+06	6.99805e+06	6.65936e+06	1.28841e+07	1.17374e+07	1.2394e+07	-	-
LysoPE 18:2*	478.29	337.27	477.286	[M+H]+	Lipids	500959	195449	301173	6.09662e+06	7.5419e+06	5.91663e+06	2.98316e+06	3.23872e+06	3.23756e+06	-	-
Cytosine	112.05	95.02	111.043	[M+H]+	Nucleotides and derivatives	995474	1.23366e+06	1.23448e+06	736724	665449	946650	1.09427e+06	1.1781e+06	1.19596e+06	C00380	ko00240,ko01100,ko01232
1-O-Feruloyl-β-D-glucose	355.1	193.05	356.111	[M-H]-	Phenolic acids	347069	390427	313047	129120	110932	211856	200539	195923	214311	C17759	-
L-Glutamic acid-O-glycoside	308.1	146.05	309.106	[M-H]-	Amino acids and derivatives	366101	96651.8	109487	480631	516389	668043	585882	556325	533439	-	-
Dimethyl phthalate	195.06	163.04	194.058	[M+H]+	Phenolic acids	400663	322149	142469	2.56466e+06	2.24155e+06	1.71636e+06	880164	966167	913698	C11233	-
1-O-Gentisoyl-β-D-glucoside	315.07	153.02	316.079	[M-H]-	Phenolic acids	1.03885e+07	1.26503e+07	1.24071e+07	151655	549250	103644	5.87758e+06	5.4794e+06	6.00354e+06	-	-
Benzoylformic acid	149.02	77.04	150.032	[M-H]-	Organic acids	510032	507627	395325	866691	793517	1.00189e+06	570379	605015	626737	C02137	ko00360,ko01100
Inosine	269.09	137.05	268.081	[M+H]+	Nucleotides and derivatives	498511	496210	510131	202037	230707	211815	342685	312213	323185	C00294	ko00230,ko01100,ko01232,ko02010
2'-Deoxyadenosine*	252.11	136.06	251.102	[M+H]+	Nucleotides and derivatives	8.90818e+06	6.89734e+06	9.39435e+06	2.43097e+07	2.08628e+07	2.60309e+07	1.66993e+07	1.54738e+07	1.53375e+07	C00559	ko00230,ko01100,ko01232,ko02010
8-(2,3-epoxy-1-hydroxy-3-methylbutyl)-7-methoxycoumarin	277.11	205.05	276.1	[M+H]+	Lignans and Coumarins	2.30705e+06	2.2857e+06	2.09281e+06	663456	666027	597360	1.61139e+06	1486023	1.48392e+06	-	-
Uridine 5'-monophosphate	323.03	211	324.036	[M-H]-	Nucleotides and derivatives	44812.1	76760.5	63368.2	390701	284914	244819	189580	193306	176350	C00105	ko00240,ko01100,ko01232,ko01240
Eupatorin-5-methylether (3'-hydroxy-5,6,7,4'-tetramethoxyflavone)	359.11	298.09	358.105	[M+H]+	Flavonoids	2.2491e+07	2.35445e+07	2.33902e+07	2.10689e+06	2.0731e+06	1.93131e+06	17006591	1.55048e+07	1.59053e+07	-	-
3-Indolepropionic acid	190.09	118.07	189.079	[M+H]+	Alkaloids	162809	146278	146822	242698	211882	209579	180333	172475	163736	-	-
2-Hydroxy-3-phenylpropanoic acid	165.06	103.06	166.063	[M-H]-	Phenolic acids	488489	512158	384258	808728	845957	846310	530843	583059	547102	C05607	ko00360,ko00960,ko01100,ko01110
Pinocembrin-7-O-rutinoside*	563.18	255.07	564.184	[M-H]-	Flavonoids	632025	509643	474289	1.08906e+06	1.16906e+06	1.32559e+06	837072	814744	894307	-	-
6',7'-Dihydroxybergamottin	373.17	203.04	372.157	[M+H]+	Lignans and Coumarins	169922	227060	163318	908039	819340	1.02431e+06	400953	417164	441497	C22156	ko00999
4-Hydroxybenzaldehyde	121.03	92.03	122.037	[M-H]-	Phenolic acids	2.58534e+06	3.41238e+06	2.94523e+06	4.49839e+06	3.48038e+06	4.57386e+06	2.73097e+06	2.92711e+06	3.00331e+06	C00633	ko01100
Galactinol	341.11	179.06	342.116	[M-H]-	Others	3.66957e+06	3.09758e+06	3.10316e+06	2.07058e+06	1.77227e+06	2.56768e+06	2.31503e+06	2.43693e+06	2.21117e+06	C01235	ko00052,ko01100
Isocitric Acid	191.02	111.01	192.027	[M-H]-	Organic acids	2.02026e+06	2.23742e+06	2.58083e+06	1.62002e+07	2.11264e+07	1.98318e+07	1.12691e+07	1.16719e+07	1.24009e+07	C00311	ko00020,ko00630,ko01100,ko01110,ko01200,ko01210,ko01230,ko01240
9S-Hydroperoxy-10E,12Z-octadecadienoic acid	311.22	293.21	312.23	[M-H]-	Lipids	1.25606e+06	1.27415e+06	1.23924e+06	2.01297e+06	1.92649e+06	2.60086e+06	1.52129e+06	1.51615e+06	1.39404e+06	C14827	ko00591,ko01100
2-(Dimethylamino)guanosine	312.13	180.09	311.123	[M+H]+	Nucleotides and derivatives	2.59132e+06	2.39573e+06	2.02797e+06	2.98213e+06	2.92149e+06	2.79602e+06	2.27228e+06	2.08711e+06	2.09419e+06	-	-
Tricin-4'-O-glucoside	493.13	331.08	492.127	[M+H]+	Flavonoids	358528	315558	341307	63938.2	55123.8	54936.4	230141	251287	250235	-	-
β-Hydroxyisovaleric acid	117.06	59.01	118.063	[M-H]-	Organic acids	427607	458645	462778	536678	445568	575798	402122	441211	434027	C20827	ko00280,ko01100
N-Methylglycine	88.04	88.04	89.0477	[M-H]-	Amino acids and derivatives	30013.2	19948.5	38030.4	40566.2	58446.3	54331.2	48123	44606.1	43984.5	C00213	ko00260,ko00330,ko01100
1-Hydroxypinoresinol-1-O-Glucoside	535.18	373.13	536.189	[M-H]-	Lignans and Coumarins	1.27694e+06	1.53646e+06	1.37978e+06	643463	778885	543042	969440	879483	936344	-	-
Isorhamnetin-3-O-sophoroside	641.17	317.07	640.164	[M+H]+	Flavonoids	2.0344e+06	2.07237e+06	1.81433e+06	786564	717525	637308	1.3752e+06	1.30342e+06	1.24714e+06	-	-
14,15-Dehydrocrepenynic acid	277.22	93.07	276.209	[M+H]+	Lipids	1.79513e+07	1.79525e+07	2.29051e+07	3.06474e+07	3.09898e+07	3.02912e+07	2.39571e+07	2.21737e+07	2.18986e+07	-	-
Esculetin (6,7-Dihydroxycoumarin)	177.02	133.03	178.027	[M-H]-	Lignans and Coumarins	393331	302287	397014	220652	245130	204704	216426	227838	238907	C09263	ko00999,ko01110
LysoPC 18:2	520.34	184.07	519.332	[M+H]+	Lipids	2.25079e+06	1.11657e+06	1.63973e+06	2.97007e+07	3.71949e+07	3.13808e+07	1.66572e+07	1.65463e+07	1.52204e+07	-	-
N(6),N(6)-Dimethyl-L-lysine	175.12	70.07	174.137	[M+H]+	Amino acids and derivatives	4.31342e+06	1.63777e+07	2.14674e+07	4.8263e+07	4.02547e+07	4.27236e+07	3.63675e+07	3.42756e+07	3.29751e+07	-	-
5-Geranyloxy-1,3-dihydroxyxanthone	315.16	187.04	314.152	[M+H]+	Lignans and Coumarins	312694	314498	306966	1.65165e+06	1.63822e+06	1.54366e+06	612569	554461	584436	-	-
9,12-Octadecadienoic acid,ethyl ester	307.26	307.26	308.272	[M-H]-	Others	1.6178e+06	1.76503e+06	1.91189e+06	5.02093e+06	5.23685e+06	2.91819e+06	5.04363e+06	4.9788e+06	5.45327e+06	-	-
3,3',5,7-Tetrahydroxy-4',6-Dimethoxyflavone; (Laciniatin)*	347.08	332.05	346.069	[M+H]+	Flavonoids	8.18158e+06	7.27977e+06	8.85195e+06	3.92324e+06	3.94909e+06	3.78789e+06	6.99332e+06	6.55784e+06	7.24409e+06	-	-
Homoproline	130.09	70.07	129.079	[M+H]+	Amino acids and derivatives	5.67618e+06	3.81114e+06	4.40227e+06	6.5913e+06	6.917e+06	5.15741e+06	5.0415e+06	5.51539e+06	5.08084e+06	-	-
5-Acetamidopentanoic Acid	158.08	116.07	159.089	[M-H]-	Organic acids	173073	201040	198255	889282	753104	915568	405952	424136	448824	C03087	ko00310,ko01100
3,24-Dihydroxy-17,21-semiacetal-12(13)oleanolic fruit	471.35	471.35	472.355	[M-H]-	Terpenoids	601621	586186	630989	508325	554736	535648	430266	461128	475237	-	-
1,3-O-Dicaffeoylquinic Acid (Cynarin)	515.12	191.03	516.127	[M-H]-	Phenolic acids	406314	318626	382451	156057	146584	140907	216592	236077	216268	C10445	-
Phe-Thr	267.13	120.08	266.127	[M+H]+	Amino acids and derivatives	904742	672129	770661	1.59212e+06	1.72224e+06	1.81147e+06	1.096e+06	1.13608e+06	1.02653e+06	-	-
2-Hydroxyisocaproic acid	131.07	85.07	132.079	[M-H]-	Organic acids	392887	351906	402100	571119	520879	663211	359309	376085	339540	C03264	-
LysoPC 16:0(2n isomer)	496.34	184.07	495.332	[M+H]+	Lipids	3.01275e+06	2.17182e+06	2.50703e+06	2.06392e+07	2.44092e+07	1.99193e+07	1.64888e+07	1.69342e+07	1.53236e+07	-	-
L-Alanyl-L-Phenylalanine	237.12	120.09	236.116	[M+H]+	Amino acids and derivatives	1.84321e+06	1.50299e+06	1.73838e+06	4.99714e+06	4.58705e+06	5.44288e+06	3.08693e+06	2.87039e+06	3.17273e+06	-	-
Hispidulin-7-O-(6''-O-p-Coumaroyl)Glucoside	609.18	463.08	608.153	[M+H]+	Flavonoids	2.0032e+07	2.05321e+07	2.20263e+07	2.02877e+07	1.7531e+07	1.63189e+07	2.05895e+07	1.8689e+07	1.9096e+07	-	-
Luteolin-6-C-glucoside (Isoorientin)*	449.11	299.06	448.101	[M+H]+	Flavonoids	2.7557e+06	2.56276e+06	2.46432e+06	285118	272505	262710	1.48054e+06	1.40923e+06	1.33539e+06	C01821	-
6-C-MethylKaempferol-3-glucoside	463.12	301.08	462.116	[M+H]+	Flavonoids	6.52594e+06	6.48788e+06	7.1176e+06	9.31327e+06	7.67725e+06	6.31155e+06	6.28679e+06	6.96938e+06	6.6766e+06	-	-
LysoPE 16:0(2n isomer)*	454.29	313.27	453.286	[M+H]+	Lipids	517373	342366	407239	2.70774e+06	3.7078e+06	2.35816e+06	4.23385e+06	4.40088e+06	3.97125e+06	-	-
L-Tyrosine	182.08	136.08	181.074	[M+H]+	Amino acids and derivatives	6.19945e+07	5.07919e+07	4.60842e+07	6.49698e+07	7.65292e+07	6.68956e+07	5.54174e+07	6.14102e+07	5.79735e+07	C00082	ko00130,ko00261,ko00350,ko00360,ko00400,ko00460,ko00730,ko00940,ko00950,ko00965,ko00966,ko00970,ko00999,ko01100,ko01110,ko01210,ko01230,ko01240
Limocitrin-7-O-glucoside	509.13	347.07	508.122	[M+H]+	Flavonoids	6.86784e+06	6.50117e+06	5782685	1.27907e+06	542299	1052505	3.95451e+06	4.06141e+06	3671975	-	-
4-Hydroxyacetophenone	135.05	92.03	136.052	[M-H]-	Phenolic acids	1.10379e+06	887597	999930	1.63974e+06	1.44863e+06	1.54383e+06	1.24989e+06	1.29899e+06	1.17181e+06	C10700	ko01100
γ-Glutamyltyrosine	311.12	165.05	310.116	[M+H]+	Amino acids and derivatives	189172	246519	206862	233232	212849	242072	174187	191631	189787	-	-
Sudachitin	359.08	329.03	360.084	[M-H]-	Flavonoids	1.00059e+06	1.06116e+06	877704	143678	135960	132173	651691	667356	603481	-	-
5,7-Dihydroxy-6,3',4',5'-tetramethoxyflavone (Arteanoflavone)*	375.11	345.06	374.1	[M+H]+	Flavonoids	2.99721e+06	2.90159e+06	2.94507e+06	321350	333540	333775	1.67971e+06	1.68352e+06	1.83763e+06	-	-
5,7-Dihydroxy-3,4',6,8-tetramethoxyflavone*	375.11	345.06	374.1	[M+H]+	Flavonoids	2.99721e+06	2.90159e+06	2.94507e+06	321350	333540	333775	1.67971e+06	1.68352e+06	1.83763e+06	-	-
5,4'-Dihydroxy-3,6,7,3'-tetramethoxyflavone*	375.11	345.06	374.1	[M+H]+	Flavonoids	2.99721e+06	2.90159e+06	2.94507e+06	321350	333540	333775	1.67971e+06	1.68352e+06	1.83763e+06	-	-
Protocatechuic Acid Methyl Ester	169.05	123.04	168.042	[M+H]+	Phenolic acids	111708	130620	150234	354737	274907	200295	227364	223485	206000	-	-
Leu-Asp	247.13	86.1	246.122	[M+H]+	Amino acids and derivatives	2.02644e+06	1.24462e+06	1.51325e+06	1.05188e+06	1.73333e+06	1.49415e+06	1.24663e+06	1.28934e+06	1.37987e+06	-	-
L-Tyrosine methyl ester	196.1	91.05	195.089	[M+H]+	Amino acids and derivatives	1.15118e+06	1.05949e+06	1.14508e+06	1.80116e+06	1.90593e+06	1.87537e+06	1.36998e+06	1.23796e+06	1.27908e+06	C03404	-
Arginine methyl ester	189.14	70.07	188.127	[M+H]+	Amino acids and derivatives	615178	570348	721273	1.422e+06	1.35043e+06	1.4066e+06	1.14567e+06	1.19537e+06	1.07681e+06	-	-
Dodecanedioic aicd	229.14	211.13	230.152	[M-H]-	Lipids	30087.1	31687.4	26711.2	13756.4	16806.8	17437.2	19767.5	21948.9	20976.7	C02678	-
2'-Deoxyguanosine	268.1	152.06	267.097	[M+H]+	Nucleotides and derivatives	1.58549e+06	941822	1.14684e+06	4.77996e+06	4.41396e+06	6.44843e+06	3.10345e+06	2.79875e+06	2.91098e+06	C00330	ko00230,ko01100,ko01232,ko02010
5-Aminovaleric acid	118.09	101.06	117.079	[M+H]+	Organic acids	215907	209271	184678	263609	161663	406400	224072	210962	234375	C00431	ko00310,ko00330,ko00470,ko01100
Trans-4-Hydroxycinnamic Acid Methyl Ester	177.06	145.03	178.063	[M-H]-	Phenolic acids	273747	275369	269867	500798	428459	500804	315338	349335	325765	-	-
Loquatoside	437.11	311.08	438.116	[M-H]-	Flavonoids	2.10755e+06	1.92207e+06	2.09035e+06	824255	917982	697182	1.396e+06	1.32686e+06	1.47441e+06	-	-
Hispidulin-8-C-glucoside	463.13	343.09	462.116	[M+H]+	Flavonoids	2.24337e+07	2.1981e+07	2.29447e+07	1.8293e+07	2.02865e+07	1.65769e+07	1.9268e+07	1.74144e+07	1.88825e+07	-	-
Myricetin-3-O-rutinoside	627.16	319.05	626.148	[M+H]+	Flavonoids	1.58545e+06	2440005	1487505	3.24886e+06	5299675	6.72263e+06	4990840	4594070	4531530	-	-
3-(1',1'-Dimethylallyl)scopoletin	261.11	189.06	260.105	[M+H]+	Lignans and Coumarins	6.54404e+07	7.35855e+07	74924360	1.6471e+06	1.57925e+06	622283	4.12487e+07	3.90125e+07	3.7103e+07	-	-
D-Sorbitol	181.07	71.01	182.079	[M-H]-	Others	276773	151780	230950	203320	102007	276731	184065	178254	197635	C00794	ko00051,ko00052,ko01100,ko02010
5'-Methoxyisolariciresinol-9'-O-glucoside	551.21	389.17	552.221	[M-H]-	Lignans and Coumarins	855846	947413	806047	67818.7	79052.3	115528	451016	428419	405274	-	-
Sinapoylglucuronic acid	399.09	205.04	400.101	[M-H]-	Phenolic acids	2.31683e+06	2.3905e+06	2.21475e+06	1.27878e+06	1.19216e+06	1.03334e+06	1.40426e+06	1.55031e+06	1.53387e+06	-	-
2-Linoleoylglycerol*	355.28	263.24	354.277	[M+H]+	Lipids	255835	268563	274105	292143	304559	348670	271117	276578	249686	-	-
5,6,7-Trimethoxycoumarin*	237.07	176.04	236.069	[M+H]+	Lignans and Coumarins	5.32354e+06	5.4107e+06	3.84723e+06	3.67374e+06	4.06132e+06	2.52677e+06	3.8341e+06	3.49624e+06	3.84988e+06	-	-
N-Acetyl-5-hydroxytryptamine	219.11	160.08	218.106	[M+H]+	Alkaloids	1.48044e+06	1.39112e+06	1.55548e+06	1.33974e+06	1.1917e+06	1.19986e+06	1.04919e+06	1.05334e+06	1.15197e+06	C00978	ko00380,ko01100,ko01110
Orotic acid (Vitamin B13)	155.01	111.02	156.017	[M-H]-	Others	304474	345309	348139	211827	127200	226612	240825	263171	265947	C00295	ko00240,ko01100,ko01240
N-(4-Aminobutyl)benzamide	193.13	105.03	192.126	[M+H]+	Alkaloids	314913	335813	252025	85398.7	140370	73101.6	180684	179670	197447	-	-
Quercetin 3,5,7,3'-tetramethyl ether	359.11	329.07	358.105	[M+H]+	Flavonoids	1.3708e+07	1.2043e+07	1.2944e+07	4.8522e+06	4.56335e+06	4.61324e+06	9.12015e+06	8.64912e+06	8.19067e+06	-	-
LysoPC 17:2	506.32	184.07	505.317	[M+H]+	Lipids	14001.5	4316.64	12462.2	209618	339891	196680	95451.3	95471.6	86839.9	-	-
Gallic acid-4-O-glucoside	331.07	313.06	332.074	[M-H]-	Phenolic acids	367689	506212	484521	28021.4	32068.6	34791.5	197477	216711	217516	-	-
Fagaramide	248.13	177.05	247.121	[M+H]+	Alkaloids	1.4861e+06	1.82626e+06	1.45434e+06	672776	590938	558324	986521	919803	888219	C10455	-
L-Malic acid	133.01	71.01	134.022	[M-H]-	Organic acids	252100	275022	380652	1.02741e+06	1.26414e+06	1.00791e+06	1.04345e+06	1.00426e+06	937303	C00149	ko00020,ko00620,ko00630,ko00710,ko01100,ko01110,ko01200
Bismurrangatin	535.2	287.05	534.189	[M+H]+	Lignans and Coumarins	90032.9	64201	97860.7	365992	276810	295291	173816	156570	169777	-	-
L-threo-3-Methylaspartate	146.05	102.06	147.053	[M-H]-	Amino acids and derivatives	126334	124362	203677	128063	134005	180886	142457	158819	151854	C03618	ko00630,ko00660,ko01100,ko01200
N-Hydroxytryptamine	177.1	160.08	176.095	[M+H]+	Alkaloids	5.38012e+06	4.98233e+06	6.03724e+06	4.52358e+06	3.72445e+06	4.07348e+06	3.54236e+06	3.89247e+06	3.90418e+06	C17203	ko00380,ko01100
Confertifoline	233.16	233.16	234.162	[M-H]-	Terpenoids	894794	828585	954657	846878	923121	924128	718825	772028	801170	C09376	-
Palmitaldehyde	239.24	223.24	240.245	[M-H]-	Lipids	3.34691e+06	3.26945e+06	3.12051e+06	2.56975e+06	2.3295e+06	2.59946e+06	2.23014e+06	2.3446e+06	2.10122e+06	C00517	ko00071
3-Hydroxy-palmitic acid methyl ester	285.24	239.24	286.251	[M-H]-	Lipids	880086	912893	809951	2.44203e+06	2.28092e+06	1.63547e+06	2.59078e+06	2.76782e+06	2.89087e+06	C11849	-
4'-Hydroxy-3,3',5,7,8-Pentamethoxyflavone*	389.12	359.08	388.116	[M+H]+	Flavonoids	1.5668e+07	1.65046e+07	1.67426e+07	603091	751954	680267	8.79219e+06	9.1635e+06	9.79903e+06	-	-
3-O-Galloyl-D-glucose*	331.07	169.01	332.074	[M-H]-	Phenolic acids	1.50158e+06	1.48543e+06	1.98269e+06	1.70938e+06	1.66567e+06	1.85983e+06	1.46025e+06	1.3224e+06	1.45387e+06	-	-
Limocitrin-3,7-di-O-glucoside	671.18	347.07	670.174	[M+H]+	Flavonoids	5.77155e+06	9.23685e+06	8.02127e+06	66927	135416	158374	3.57517e+06	3.21932e+06	3.30167e+06	-	-
N-Acetyl-L-Aspartic Acid	174.04	88.04	175.048	[M-H]-	Amino acids and derivatives	180618	64845.7	92908	79172.1	103342	146080	96756.8	106254	96487.3	C01042	ko00250,ko01100
Demethylbufotenine O-Glucoside	353.17	160.08	352.163	[M+H]+	Alkaloids	3.6542e+06	3.75299e+06	3.90433e+06	1.85997e+07	2.03535e+07	2.10761e+07	1.06808e+07	1.06218e+07	1.17153e+07	-	-
5-De-O-methyltoddanol	277.11	205.05	276.1	[M+H]+	Lignans and Coumarins	2.3913e+06	2.34043e+06	1.88086e+06	153151	152179	104007	1.18402e+06	1.13943e+06	1.05955e+06	-	-
3,19-Dihydroxyurs-12-en-28-oic acid (Pomolic acid)	471.35	471.35	472.355	[M-H]-	Terpenoids	562778	624452	809238	597197	464892	636022	396716	440684	434085	-	-
Chrysoeriol-5,7-di-O-glucoside	625.17	301.07	624.169	[M+H]+	Flavonoids	236206	167274	152608	34023.9	51519.9	38885.8	90446.4	97205.8	101094	-	-
Monopalmitin	331.28	313.27	330.277	[M+H]+	Lipids	308663	310349	315435	306282	301170	209432	333278	301236	331715	-	-
24,30-Dihydroxy-12(13)-ene-lupeol	455.35	455.35	456.36	[M-H]-	Terpenoids	203875	88957.3	80195.6	1.22276e+06	1.27255e+06	1.02052e+06	594531	641017	664370	-	-
DL-2-hydroxystearic acid*	299.26	253.25	300.266	[M-H]-	Lipids	358930	346396	244881	1.07381e+06	874748	509691	3.33515e+06	3.57723e+06	3.20377e+06	-	-
Tryptophan N-Rutinoside	513.21	205.1	512.201	[M+H]+	Alkaloids	2.54307e+07	2.78585e+07	2.32443e+07	5.42283e+07	4.99662e+07	4.14786e+07	3.79642e+07	3.42335e+07	3.48213e+07	-	-
Luteolin-6-C-arabinoside-7-O-glucoside	581.15	383.07	580.143	[M+H]+	Flavonoids	661056	1.09592e+06	1.00046e+06	252583	249750	171606	489731	467886	523082	-	-
Aromatide	328.15	177.06	327.147	[M+H]+	Alkaloids	2.10025e+07	1.99488e+07	2.18517e+07	6.32885e+06	5.97084e+06	6.82e+06	1.28123e+07	1.37414e+07	1.23015e+07	-	-
2'-Deoxycytidine	228.1	112.05	227.091	[M+H]+	Nucleotides and derivatives	947792	585360	842361	2.11042e+06	1.97654e+06	2.56321e+06	1.38106e+06	1.40797e+06	1.53345e+06	C00881	ko00240,ko01100,ko01232,ko02010
E,E,Z-1,3,12-Nonadecatriene-5,14-diol	293.25	293.25	294.256	[M-H]-	Lipids	3.13763e+06	3.01282e+06	2.07334e+06	2.35323e+07	2.77457e+07	2.31536e+07	1.99994e+07	1.79442e+07	1.95651e+07	-	-
Eriodictyol (5,7,3',4'-Tetrahydroxyflavanone)	287.06	135.05	288.063	[M-H]-	Flavonoids	1.04603e+06	893855	1.36718e+06	219426	247113	233049	688120	634325	708662	C05631	ko00941,ko01100,ko01110
Isorhamnetin-3,7-O-diglucoside	641.17	479.11	640.164	[M+H]+	Flavonoids	1.29426e+06	1197505	1057505	345564	383628	294453	650854	623745	697518	-	-
3-Oxolup-20(29)-en-28-oic acid (Betulonic acid)	453.34	453.34	454.345	[M-H]-	Terpenoids	204291	148071	123854	165650	155035	112239	208654	186999	193175	-	-
L-Valyl-L-Leucine	231.17	72.08	230.163	[M+H]+	Amino acids and derivatives	3.9226e+06	2.79448e+06	3.85352e+06	5.8956e+06	5.98924e+06	6.25888e+06	4.45424e+06	4.03671e+06	4.04897e+06	-	-
Octanoic acid	143.11	143.11	144.115	[M-H]-	Lipids	78688.5	79453.9	75113.8	18889.2	19255.9	21555.1	37920.8	40210.8	42500.8	C06423	ko00061,ko00785,ko01100,ko01240
6-O-Caffeoylarbutin	433.11	271.06	434.121	[M-H]-	Phenolic acids	1.20406e+06	1.24803e+06	1.41488e+06	2.66233e+06	2.44941e+06	2.80716e+06	1.84149e+06	1.93043e+06	1.72233e+06	-	-
4-Hydroxyhippurate	196.06	121.03	195.053	[M+H]+	Amino acids and derivatives	94878.9	147773	246716	280285	265567	291611	250726	237587	223666	-	-
Caffeic aldehyde	165.05	95.05	164.047	[M+H]+	Phenolic acids	54740.5	47997.5	55062.8	17009.4	16751.9	26373	37901.3	42300.4	41336.4	C10945	ko00940,ko01110
L-Aspartic Acid	132.03	88.04	133.037	[M-H]-	Amino acids and derivatives	5.49737e+06	4.57857e+06	8.05778e+06	6.38796e+06	7.89137e+06	7.63186e+06	6.80096e+06	7.44283e+06	6.7052e+06	C00049	ko00220,ko00250,ko00260,ko00261,ko00270,ko00300,ko00340,ko00410,ko00460,ko00470,ko00710,ko00760,ko00770,ko00970,ko00999,ko01100,ko01110,ko01200,ko01210,ko01230,ko01240,ko02010
Phenyl acetate	135.05	92.03	136.052	[M-H]-	Phenolic acids	1.02792e+06	776240	914430	1.80394e+06	1.67078e+06	1.30011e+06	984737	1.09564e+06	1.08244e+06	C00548	-
Apigenin-7-O-glucoside(Cosmosiin)	431.1	269.04	432.106	[M-H]-	Flavonoids	140626	123323	97338.1	145320	167753	152140	126435	132256	141675	C04608	ko00944
Putrescine	89.11	72.08	88.1	[M+H]+	Alkaloids	1.41861e+06	1.54747e+06	1.31006e+06	694539	678501	677622	1.01717e+06	947704	907841	C00134	ko00330,ko00470,ko00480,ko00960,ko01100,ko01110,ko02010
Caffeoylcholine	266.14	207.07	266.139	[M]+	Alkaloids	135779	481514	124045	236888	1.5669e+06	1.06837e+06	606005	549510	548576	-	-
Luteolin-7-O-(6''-malonyl)glucoside	535.11	287.05	534.101	[M+H]+	Flavonoids	17042.8	14902.3	19868.8	139065	265291	206024	91648.9	102578	99779.7	C10103	-
5-Hydroxyauranetin	389.12	328.1	388.116	[M+H]+	Flavonoids	4.5101e+06	4.37508e+06	4.60238e+06	1.33735e+06	1.37629e+06	1.27605e+06	2.73045e+06	2.97296e+06	3.05727e+06	-	-
Scopoletin-7-O-glucoside (Scopolin)	355.1	193.05	354.095	[M+H]+	Lignans and Coumarins	1.77958e+07	1.99703e+07	2.24129e+07	1.15888e+07	1.24687e+07	1.05579e+07	1.42504e+07	1.54694e+07	1.38469e+07	C01527	ko00999,ko01110
Blumenol A	225.15	123.08	224.141	[M+H]+	Others	189587	108979	175152	61193.6	97237.8	68114.7	130862	116821	121422	-	-
Glucopyranose 6-Hydroxydecanoate	409.21	161.05	350.194	[M+CH3COOH-H]-	Others	220423	237695	235574	310887	305564	282197	270589	253419	284800	-	-
Isofraxidin-7-O-glucoside	385.11	223.06	384.106	[M+H]+	Lignans and Coumarins	107505	38402.4	92505	1.01242e+06	1.16843e+06	912588	613850	558531	553341	-	-
1,6-anhydro-β-D-glucose	161.05	71.01	162.053	[M-H]-	Others	219407	251972	244083	173630	196753	189914	161506	144101	149933	-	-
Obacunone	455.21	409.2	454.199	[M+H]+	Terpenoids	592435	574985	1.11705e+06	2.52562e+06	1.8989e+06	2.79826e+06	961855	1.04074e+06	1.07967e+06	C08775	-
Syringic acid	197.05	123.01	198.053	[M-H]-	Phenolic acids	116522	93833.7	102046	104114	82178.1	106527	100143	89102	94097.2	C10833	-
Justicidin C*	395.11	365.07	394.105	[M+H]+	Lignans and Coumarins	2.68539e+06	1.79318e+06	1.71311e+06	125093	119263	132339	1.4623e+06	1.31334e+06	1.33563e+06	-	-
L-Fucitol	165.08	59.02	166.084	[M-H]-	Others	1.07974e+06	1.09981e+06	1.15628e+06	1.45912e+06	1.48255e+06	1.5232e+06	1.49145e+06	1.67507e+06	1.56442e+06	-	-
5,4'-Dihydroxy-6,7,8,3'-tetramethoxyflavone	375.11	345.06	374.1	[M+H]+	Flavonoids	1.55732e+06	1.57018e+06	1.49512e+06	81431.9	71269.6	70831.2	684327	768615	717858	-	-
3,4-Dihydroxy-L-phenylalanine (L-Dopa)	198.08	152.07	197.069	[M+H]+	Amino acids and derivatives	297446	313803	338575	210297	152102	177685	205722	209672	229271	C00355	ko00350,ko00950,ko00965,ko01100,ko01110
D-Glucosamine 1-phosphate	258.04	78.96	259.046	[M-H]-	Others	110248	108650	77695.8	188140	219495	205315	132285	139406	148717	C06156	ko00520,ko01100,ko01250
Methyl palmitate	269.25	251.24	270.256	[M-H]-	Lipids	15422	16006.5	16512.3	192608	189608	122751	195352	199301	217958	C16995	-
Genkwanin (Apigenin 7-methyl ether)*	285.08	242.05	284.068	[M+H]+	Flavonoids	29291.5	31600.6	32845.6	41032.6	36036.4	44083.3	32076.3	29648.7	28604.9	C10046	-
Pyridine-4-formyl-O-β-D-glucopyranoside	286.09	124.04	285.085	[M+H]+	Others	277759	238095	294331	213056	212335	162987	235178	209690	228950	-	-
cedrecoumarin B	275.13	161.07	274.12	[M+H]+	Lignans and Coumarins	1.02536e+06	904829	940598	17520.3	17332.5	12660.8	343049	307452	339282	-	-
5-Methoxydictamnine	230.08	215.06	229.074	[M+H]+	Alkaloids	114844	80079.6	99948.1	25725.7	27973.3	18566.3	57957	56749.2	63378.5	-	-
Chrysoeriol-8-C-glucoside (Scoparin)	463.11	343.08	462.116	[M+H]+	Flavonoids	1.66001e+07	1.78426e+07	2.00149e+07	1.68822e+07	1.63495e+07	1.52099e+07	1.49844e+07	1.67562e+07	1.64969e+07	-	-
JiangxiBaiyingsu I	293.21	151.11	292.204	[M+H]+	Terpenoids	129825	177638	135584	1.00412e+06	879164	1.03511e+06	463795	420590	417242	-	-
Trans-p-hydroxycinnamic acid ethyl ester	193.09	178.06	192.079	[M+H]+	Terpenoids	1.26457e+07	1.1783e+07	1.05084e+07	1.11899e+06	903909	993362	6.8347e+06	7.3154e+06	6.49438e+06	-	-
2R-hydroxy-9Z,12Z,15Z-octadecatrienoic acid	293.21	185.12	294.219	[M-H]-	Lipids	3.39404e+06	3.314e+06	3.82611e+06	6.73745e+06	6.56618e+06	6.54052e+06	4.22406e+06	4.40236e+06	4.75037e+06	C16342	ko00592
6-C-Methylquercetin-3-O-rhamnoside	463.12	317.06	462.116	[M+H]+	Flavonoids	3.52631e+06	3.06199e+06	3.72595e+06	3.43279e+06	3.4768e+06	3.35621e+06	3.23259e+06	3.12432e+06	2.87157e+06	-	-
Isoluteolin-6,8-di-C-glucoside	611.16	491.12	610.153	[M+H]+	Flavonoids	2.95665e+06	2.21859e+06	2.09648e+06	1.91898e+06	1.13183e+06	1.37224e+06	1.27494e+06	1.38817e+06	1.23783e+06	-	-
Isochlorogenic acid A*	515.12	353.09	516.127	[M-H]-	Phenolic acids	257124	327199	271479	37767.6	21286.5	68195.6	174338	191004	170844	-	-
Mandelic acid	151.04	107.05	152.047	[M-H]-	Phenolic acids	165135	168561	182732	132757	117286	143238	124714	136040	140311	C01984	-
D-Arabitol	151.06	59.01	152.069	[M-H]-	Others	409181	309703	381562	225088	216812	229644	233747	262287	257111	C01904	ko00040,ko01100
Epipinoresinol	357.13	151.04	358.142	[M-H]-	Lignans and Coumarins	97686.6	90829.8	109353	32881.5	30808.4	21665.3	71959.7	77721.1	81189	-	-
Pentadecanoic Acid	241.22	241.22	242.225	[M-H]-	Lipids	2.6987e+06	3.80467e+06	3.14019e+06	5.57075e+06	6.09396e+06	5.51502e+06	5.58847e+06	5.39838e+06	4.96049e+06	C16537	-
5-Methoxy-8-hydroxypsoralen	233.04	218.02	232.037	[M+H]+	Lignans and Coumarins	91153.2	111058	123609	4.7935e+06	4.4893e+06	3.72507e+06	1.4562e+06	1.502e+06	1.3337e+06	-	-
Caffeoyl-p-coumaroyltartaric acid	457.08	295.04	458.085	[M-H]-	Phenolic acids	1.58497e+07	1.34651e+07	1.57047e+07	1.61647e+06	2.24943e+06	1.00489e+06	8.33638e+06	8.90027e+06	9.41786e+06	-	-
Aculeatin	291.12	219.07	290.115	[M+H]+	Lignans and Coumarins	2.17646e+07	2.05437e+07	2.2104e+07	136503	106540	107491	1.37408e+07	1.21583e+07	1.29979e+07	-	-
Limocitrin-3-O-(3-hydroxy-3-methylglutarate)glucoside-glucoside	815.22	347.08	814.216	[M+H]+	Flavonoids	1.4897e+07	1.36579e+07	1.33523e+07	3.24231e+06	3.06581e+06	3.07147e+06	7.82336e+06	8.45379e+06	8.83736e+06	-	-
1-Caffeoylquinic acid	353.09	191.06	354.095	[M-H]-	Phenolic acids	721750	632134	746378	863236	948144	736972	692304	726504	781307	-	-
Oleic acid	283.26	121.1	282.256	[M+H]+	Lipids	118054	124023	66206.2	9388.04	9800.6	8326.1	56254	49919.7	51984.2	C00712	ko00061,ko00073,ko01040
N-(4-hydroxyphenethyl)cinnamamide	268.13	131.05	267.126	[M+H]+	Alkaloids	1.15999e+07	9.94974e+06	1.00242e+07	1.96574e+06	2.1282e+06	1.49967e+06	6.87672e+06	6.33615e+06	6.10602e+06	-	-
Naringenin-4'-O-glucoside*	433.12	271.06	434.121	[M-H]-	Flavonoids	6.15318e+06	7.06143e+06	8.73601e+06	4.11999e+06	4.70004e+06	4.62463e+06	6.7463e+06	5.96611e+06	6.42384e+06	-	-
3-Hydroxypropanoic acid	89.02	59.01	90.0317	[M-H]-	Organic acids	256265	204290	205782	123514	109038	204973	153509	137638	138931	C01013	ko00240,ko00410,ko00640,ko01100,ko01200
2',7-Dihydroxy-3',4'-dimethoxyisoflavan	303.12	285.12	302.115	[M+H]+	Flavonoids	1.5143e+06	1926277	1.56596e+06	6.48308e+06	5.3462e+06	6.38939e+06	3.54052e+06	3.17103e+06	3.52979e+06	-	-
8-Hydroxyguanosine	298.08	208.05	299.087	[M-H]-	Nucleotides and derivatives	119909	77377.4	83679.5	76855.2	86004.6	106072	106606	105954	95329.1	-	-
3-[(1-Carboxyvinyl)oxy]benzoic acid	207.03	119.05	208.037	[M-H]-	Phenolic acids	214049	197882	182138	23104.4	33003.3	45528.6	70425.7	69304.4	62703.3	C20772	ko00130,ko01100,ko01110,ko01240
Persicogenin (5,3'-dihydroxy-7,4'-dimethoxyflavanone)	317.1	167.04	316.095	[M+H]+	Flavonoids	118877	130647	119245	692628	663716	684170	293109	290417	261666	-	-
Vomifoliol	225.15	95.08	224.141	[M+H]+	Terpenoids	1.217e+06	1.213e+06	2.10272e+06	326489	312622	325050	693019	736061	650090	C04166	-
6,7,8-Tetrahydroxy-5-methoxyflavone	301.07	286.05	300.063	[M+H]+	Flavonoids	5.72042e+06	5.3247e+06	5.70445e+06	4.01601e+06	3.73905e+06	4.11891e+06	4.03579e+06	3.62235e+06	3.6405e+06	-	-
Quercetin-5,4'-di-O-glucoside	627.15	303.05	626.148	[M+H]+	Flavonoids	136290	175234	230131	226710	263819	165605	190148	175397	198455	-	-
Isorhamnetin-3-O-rhamnoside	463.12	317.06	462.116	[M+H]+	Flavonoids	3.66815e+06	3.6065e+06	3.64711e+06	4.20762e+06	3.89984e+06	3.40137e+06	3.5494e+06	3.13557e+06	3.38935e+06	-	-
Isonicotinic acid	124.04	78.03	123.032	[M+H]+	Others	2.0755e+06	1.7978e+06	1.91913e+06	1.88958e+06	2.01381e+06	1.80128e+06	1.84967e+06	2.07574e+06	2.05049e+06	C07446	-
Diosmetin-6-C-glucoside	463.12	427.1	462.116	[M+H]+	Flavonoids	1.09468e+07	1.0752e+07	1.15528e+07	1.05692e+07	9.30275e+06	7.58178e+06	9.17792e+06	8.91327e+06	1.00292e+07	-	-
Cnidioside A	367.1	205.05	368.111	[M-H]-	Lignans and Coumarins	926061	764344	856078	1.54508e+07	1.47232e+07	1.6713e+07	9.62986e+06	8.80579e+06	9.9502e+06	-	-
3-O-Methylquercetin	315.05	271.02	316.058	[M-H]-	Flavonoids	15785.9	16602.8	15752	15522.8	16453.8	17285.6	15030	14179.9	13257.8	C04443	ko00944,ko01110
2'-O-Methyladenosine	282.12	136.06	281.112	[M+H]+	Nucleotides and derivatives	1.22403e+07	9.17791e+06	9.10276e+06	1.25025e+07	1.07941e+07	1.48163e+07	1.02727e+07	9.75326e+06	9.06118e+06	-	-
N7-Methylguanosine	298.11	166.07	297.107	[M+H]+	Nucleotides and derivatives	2.25712e+06	1.92282e+06	2.10186e+06	1.28485e+06	1.42234e+06	1.5626e+06	1.63177e+06	1.43903e+06	1.53635e+06	C20674	-
1-(4-Methoxyphenyl)allyl acetate	207.1	176.08	206.094	[M+H]+	Phenolic acids	212019	222492	179494	9	9	9	108946	96087.8	103635	-	-
3-Methylxanthine	167.06	124.05	166.049	[M+H]+	Nucleotides and derivatives	63643.3	65628.3	53308.5	189380	132483	147463	113626	127231	126682	C16357	ko00232,ko01100,ko01110
Tricin-7-O-(6''-O-malonyl)glucoside	579.13	331.08	578.127	[M+H]+	Flavonoids	4.76061e+06	4.65139e+06	4.47514e+06	781291	552211	733699	3.34679e+06	2.97247e+06	3.05573e+06	-	-
N-Acetyl-D-glucosamine-1-phosphate	300.05	96.97	301.056	[M-H]-	Others	60744.1	50403.6	56368.3	47968.4	37242	56235.3	74258.3	67331.4	66183.5	C04256	-
N-Acetyl-L-threonine	160.06	98.02	161.069	[M-H]-	Amino acids and derivatives	75337.6	77973.9	85076.4	203101	165588	158198	143945	131475	148758	-	-
Epoxybergamottin	355.16	203.04	354.147	[M+H]+	Lignans and Coumarins	7.88191e+06	7.05013e+06	9.22658e+06	2.67071e+07	2.44154e+07	2.75491e+07	2.07944e+07	2.06721e+07	1.85448e+07	C22153	ko00999
Dihydroxy-dimethoxyflavone-7-O-glucoside*	477.14	315.1	476.132	[M+H]+	Flavonoids	1.70428e+06	1.764e+06	1.78897e+06	409097	391053	281475	1.05138e+06	955469	934894	-	-
Malonic acid	103	59.01	104.011	[M-H]-	Organic acids	1.94019e+06	1.86906e+06	1.55043e+06	3.3458e+06	3.39347e+06	3.14966e+06	2.56485e+06	2.8334e+06	2.89611e+06	C00383	ko00061,ko00240,ko00410,ko01100,ko01212
(S)-Columbianetin	247.1	175.04	246.089	[M+H]+	Lignans and Coumarins	1.46932e+06	1.48902e+06	975231	3752.81	20036.5	15708.6	787551	693275	747003	C19707	ko00999,ko01110
Palmitic acid	255.23	237.22	256.24	[M-H]-	Lipids	80774.7	93402.2	82996	61941.7	88957.6	65439.6	95140.5	86526.2	97904.8	C00249	ko00061,ko00062,ko00071,ko00073,ko01040,ko01100,ko01212
Ditartaroyl-hydroxycoumarin	427.05	295.05	426.043	[M+H]+	Lignans and Coumarins	310982	291374	278646	355248	337919	284700	234244	260694	263370	-	-
5-methoxyseselin	259.1	217.05	258.089	[M+H]+	Lignans and Coumarins	79191.4	56758.5	52468	348040	462816	332759	162634	143135	154240	-	-
Quercetin-3-O-xyloside (Reynoutrin)*	435.09	303.06	434.085	[M+H]+	Flavonoids	234179	319686	392561	271149	336274	209936	263555	291558	297529	-	-
Nicotinate D-ribonucleoside	256.08	124.04	256.082	[M]+	Others	845079	959827	896645	380679	403274	356850	398669	453123	429741	C05841	ko00760,ko01100
Kaempferol (3,5,7,4'-Tetrahydroxyflavone)	285.04	151	286.048	[M-H]-	Flavonoids	14487.6	14427.7	13229.2	111128	77959.2	74718.9	39726.9	44421.1	39948.4	C05903	ko00941,ko00944,ko01100,ko01110
Chrysoeriol-6-C-glucoside-4'-O-glucoside	625.18	463.13	624.169	[M+H]+	Flavonoids	3.33344e+06	3.36397e+06	3.425e+06	1.51347e+06	1.7486e+06	1.46826e+06	2.29001e+06	2.02982e+06	2.08429e+06	-	-
Umbelliferone 7-O-Rutinoside	471.15	163.04	470.142	[M+H]+	Lignans and Coumarins	2.91046e+07	2.89843e+07	2.83893e+07	2.26374e+06	2.51809e+06	2.14033e+06	1.2985e+07	1.45302e+07	1.30634e+07	-	-
Fumaric acid	115	71.01	116.011	[M-H]-	Organic acids	556532	500066	514643	1.10986e+06	798687	1.05893e+06	1.17322e+06	1.1053e+06	1.25717e+06	C00122	ko00020,ko00190,ko00220,ko00250,ko00350,ko00360,ko00620,ko00650,ko00760,ko01100,ko01110,ko01200
3-O-Feruloylquinic acid	369.12	177.05	368.111	[M+H]+	Phenolic acids	2.69703e+06	2.92222e+06	2.58413e+06	989209	923359	808479	1.35007e+06	1.37707e+06	1.52032e+06	C02572	-
7-Methylguanine	166.07	149.05	165.065	[M+H]+	Nucleotides and derivatives	168306	136219	150506	179708	180699	177722	148153	143489	162272	C02242	-
5-O-Caffeoylshikimic acid	335.08	179.03	336.084	[M-H]-	Phenolic acids	476679	586939	485118	88467.3	107491	109806	335779	328170	370138	C10434	ko00940,ko00941,ko00945,ko01100,ko01110
N-Acetyl-L-Arginine	217.13	158.08	216.122	[M+H]+	Amino acids and derivatives	83272.4	74212.9	76045	119673	99383.2	144730	86792.2	82180.1	93477.9	-	-
8-Isopentenyllimettin	275.13	219.05	274.12	[M+H]+	Lignans and Coumarins	2.42842e+06	2.34203e+06	2.09883e+06	224999	188473	173461	961480	893325	845161	-	-
1-(4-Methoxyphenyl)-1-propanol	165.09	149.06	166.099	[M-H]-	Phenolic acids	126058	143061	99969.2	107172	101813	79800.3	80606.3	86438.4	75924.1	-	-
4-Aminobenzoic acid	138.06	120.04	137.048	[M+H]+	Phenolic acids	179626	204120	125086	512951	482307	286684	249388	265271	284054	C00568	ko00790,ko01100,ko01240
Limonin	471.2	425.2	470.194	[M+H]+	Terpenoids	6.94801e+06	6.01645e+06	9.21134e+06	3.39268e+06	2.92071e+06	3.4261e+06	5.30734e+06	4.67627e+06	5.15767e+06	C03514	-
3',4',5,6,7-Pentamethoxyflavanone*	375.14	211.07	374.137	[M+H]+	Flavonoids	1.09091e+07	1.09757e+07	1.22721e+07	1.15216e+06	1.24289e+06	1.15995e+06	5.82829e+06	6.32083e+06	6.64481e+06	-	-
1,5-Dihydroxy-3,4-Dimethoxyacridin-9(10H)-One	288.09	273.06	287.079	[M+H]+	Alkaloids	820581	660337	732851	11154.4	12749.6	20182.1	364700	368333	326453	-	-
LysoPC 18:1(2n isomer)	522.36	184.07	521.348	[M+H]+	Lipids	350198	349529	393454	950016	1.32218e+06	1.08828e+06	1.19581e+06	1.1587e+06	1.05206e+06	-	-
Petroselinic acid*	281.25	281.25	282.256	[M-H]-	Lipids	5.32867e+07	5.56348e+07	5.51084e+07	7.18471e+07	7.29623e+07	4.38387e+07	6.64383e+07	6.23465e+07	7.11112e+07	C08363	-
Asn-Leu	246.14	141.1	245.138	[M+H]+	Amino acids and derivatives	743604	523568	737609	568652	957981	1.13138e+06	763530	669462	712838	-	-
Hydroxy ricinoleic acid	313.24	183.14	314.246	[M-H]-	Lipids	420523	451291	388311	528071	502990	571861	369838	393658	421946	-	-
Sedoheptulose	209.07	59.01	210.074	[M-H]-	Others	4.04257e+06	3.1985e+06	3.3666e+06	5.30956e+06	4.43813e+06	6.13593e+06	3.10582e+06	3.53906e+06	3.40014e+06	C02076	ko00710,ko01100
N6-Acetyl-L-lysine	189.12	126.09	188.116	[M+H]+	Amino acids and derivatives	450138	412158	463247	1.4993e+06	1.27204e+06	1.68892e+06	890716	1.01425e+06	935252	C02727	ko00310,ko01100
S-Methyl-L-cysteine	136.04	91.05	135.035	[M+H]+	Amino acids and derivatives	7.58399e+06	6.72122e+06	6.43567e+06	9.39295e+06	1.23209e+07	1.08661e+07	7.95968e+06	8.63528e+06	9.08428e+06	C22040	ko02010
Nomilinic acid	531.23	489.21	532.231	[M-H]-	Others	1.46517e+06	1.63071e+06	2.71428e+06	1.02797e+07	8.90716e+06	1.06702e+07	5.57028e+06	5.79843e+06	6.33144e+06	-	-
D-Mannitol	181.07	101.02	182.079	[M-H]-	Others	148377	64238.2	92606.2	61035.4	39483.9	120437	76295.1	73663.3	83623	C00392	ko00051,ko01100,ko02010
Kaempferol-3-O-rutinoside(Nicotiflorin)	593.15	285.04	594.159	[M-H]-	Flavonoids	165009	178934	155314	1.91112e+06	1.47956e+06	1.33972e+06	862880	760053	787330	C21833	ko00944,ko01110
5-Aminolevulinic Acid	132.07	86.06	131.058	[M+H]+	Alkaloids	491214	510310	548359	786326	991785	779833	673515	608993	692445	C00430	ko00260,ko00860,ko01100,ko01110,ko01240,ko02010
1,4,5,6-Tetrahydroxyxanthone	261.04	187.04	260.032	[M+H]+	Flavonoids	547522	580341	520182	6704.69	4767.84	3496.55	325690	315458	286092	-	-
1-O-Caffeoyl-(6-O-glucosyl)-β-D-glucose	503.14	341.09	504.148	[M-H]-	Phenolic acids	59400	59165.1	71172.7	38256.7	45664.1	53808.8	58267.3	62107.8	54348.5	-	-
Phellopterin	301.11	218.02	300.1	[M+H]+	Lignans and Coumarins	125744	173028	228000	1.81471e+07	1.9275e+07	1.85405e+07	8.35359e+06	7.61632e+06	7.35343e+06	C17047	-
LysoPC 19:0	538.39	184.07	537.379	[M+H]+	Lipids	8719.74	12325.2	5214.02	227994	300192	311026	110985	106400	97227.2	-	-
α-Ketoglutaric acid	145.01	101.02	146.022	[M-H]-	Organic acids	117442	229916	137781	29270.7	31989.1	26677.3	100045	89210.9	100720	C00026	ko00020,ko00040,ko00053,ko00220,ko00250,ko00300,ko00310,ko00340,ko00430,ko00470,ko00630,ko00650,ko00660,ko01100,ko01110,ko01200,ko01210,ko01230,ko01240
L-Carnitine	162.11	85.03	161.105	[M+H]+	Alkaloids	1.81792e+07	1.6975e+07	2.2297e+07	2.14521e+07	2.00517e+07	2.23204e+07	2.04323e+07	2.16958e+07	2.33438e+07	C00318	-
4-O-Methylgallic Acid	183.03	124.02	184.037	[M-H]-	Phenolic acids	148217	156934	124144	69116	47411.9	55337.1	97331.6	85818.3	95728.1	-	-
Sinensetin (5,6,7,3',4'-pentamethoxyflavone)	373.13	312.1	372.121	[M+H]+	Flavonoids	1.34695e+06	1.25609e+06	1.42331e+06	109812	114760	101740	934043	827914	838914	C10186	-
4-O-Glucosyl-4-hydroxybenzoic acid	299.08	137.02	300.084	[M-H]-	Phenolic acids	1.42614e+06	2.14169e+06	2.44948e+06	77208	56813.9	40686.8	1.30198e+06	1.41656e+06	1.24157e+06	-	-
DL-Glyceraldehyde-3-phosphate	168.99	78.96	169.998	[M-H]-	Organic acids	7560.13	14211	10758.4	37435.5	21963	26984.8	31299.9	34228.8	35786.3	C00661	-
Octadeca-11E,13E,15Z-trienoic acid	279.23	149.13	278.225	[M+H]+	Lipids	3.74722e+07	2.75017e+07	2.64298e+07	2.04821e+07	2.03139e+07	2.07248e+07	2.37931e+07	2.1006e+07	2.14395e+07	-	-
Cryptochlorogenic acid (4-O-Caffeoylquinic acid)*	353.09	191.06	354.095	[M-H]-	Phenolic acids	450411	379804	423206	637333	539402	859841	450169	514367	472939	-	-
Quercetin-7-O-glucoside*	463.09	301.04	464.096	[M-H]-	Flavonoids	1.07396e+06	1.21986e+06	886457	1.55461e+06	1.22184e+06	1.73476e+06	1.23874e+06	1.38574e+06	1.23048e+06	C12639	-
Phloretin	273.08	167.03	274.084	[M-H]-	Flavonoids	93012.7	54130.5	55820.3	56940.7	45601.7	49535.1	65188.2	57054.4	59851.2	C00774	ko00941,ko01110
Eriodictyol-7-O-Rutinoside (Eriocitrin)	595.17	287.06	596.174	[M-H]-	Flavonoids	972051	1.04451e+06	1.01461e+06	1.95194e+06	1.63185e+06	1.40827e+06	1.05534e+06	1.00523e+06	921363	C09732	-
Isorhamnetin-3-O-arabinoside	449.11	317.06	448.101	[M+H]+	Flavonoids	7.43226e+06	7.59646e+06	8.24683e+06	2.44187e+06	2.47916e+06	1.93551e+06	5.91762e+06	5.94281e+06	6.659e+06	-	-
Naringenin chalcone; 2',4,4',6'-Tetrahydroxychalcone	273.08	153.02	272.068	[M+H]+	Flavonoids	1.59014e+07	1.16625e+07	1.47035e+07	2.16462e+07	2.10319e+07	2.28131e+07	1.72795e+07	1.59483e+07	1.50979e+07	C06561	ko00941,ko01100,ko01110
N-Oleoylethanolamine	326.31	62.06	325.298	[M+H]+	Alkaloids	297742	251680	273242	224701	166785	170734	517107	465776	456196	C20792	-
Pimpinellin	247.06	217.01	246.053	[M+H]+	Lignans and Coumarins	2.78888e+06	2.72128e+06	2.89739e+06	474043	509083	392478	1.54198e+06	1.47375e+06	1.3462e+06	C09285	-
L-Pipecolic Acid	130.09	84.08	129.079	[M+H]+	Organic acids	759681	913611	846583	1.03408e+06	1.27294e+06	930968	847293	965990	943288	C00408	ko00310,ko00960,ko01100,ko01110
6-Hydroxy-5,7,4'-trimethoxyflavone	329.1	268.08	328.095	[M+H]+	Flavonoids	3.05918e+07	3.06532e+07	2.89454e+07	4.04634e+06	3.99597e+06	3.53709e+06	2.21489e+07	1.95866e+07	1.98541e+07	C14985	-
1,2,3,6,7-Pentamethoxyxanthone	347.11	332.09	346.105	[M+H]+	Flavonoids	719712	1.00727e+06	818030	449703	391772	451984	588654	672329	653001	-	-
2-Hydroxycinnamic acid*	163.04	119.05	164.047	[M-H]-	Phenolic acids	1.13544e+07	1.08223e+07	1.17532e+07	2.47626e+07	2.4408e+07	2.69839e+07	1.55196e+07	1.68293e+07	1.78083e+07	C01772	ko00360,ko00999,ko01100,ko01110
LysoPC 16:0	496.34	184.07	495.332	[M+H]+	Lipids	3.00403e+06	2.23676e+06	2.50801e+06	1.98267e+07	2.57487e+07	19482289	1.69763e+07	1.70547e+07	1.50649e+07	-	-
1-O-p-Coumaroyl-β-D-glucose	325.09	163.04	326.1	[M-H]-	Phenolic acids	534472	525591	458015	297120	346389	319637	473555	506795	441415	C16827	-
2-(7-butoxy-4,8-dimethyl-2-oxochromen-3-yl)acetic acid	305.14	189.05	304.131	[M+H]+	Lignans and Coumarins	1.13102e+06	1.47357e+06	1.09448e+06	92168.8	101045	81725.4	630937	672935	724225	-	-
3-Methylmalic acid	147.03	57.03	148.037	[M-H]-	Organic acids	982839	749113	821636	1.1091e+06	1.17385e+06	1.1948e+06	842364	959668	941884	C06032	ko00290,ko00660,ko01100,ko01210,ko01230
Natsudaidain 3-Glucoside	581.18	419.13	580.179	[M+H]+	Flavonoids	1.50186e+06	1.09183e+06	1.22018e+06	450053	486669	524352	705656	746566	649957	-	-
Myristoleic acid	225.19	207.18	226.193	[M-H]-	Lipids	19901	15908.5	16991.9	16713.2	21110.2	20498	16057.8	18336.4	16666.3	C08322	-
2-Isopropylpsoralen	229.09	175.04	228.079	[M+H]+	Lignans and Coumarins	107780	138173	128488	4581.59	3582.14	4650.68	51449.3	58207.5	58135.7	-	-
4-Nitrophenol	140.03	98.96	139.027	[M+H]+	Phenolic acids	32392450	3.36976e+07	2.79463e+07	5.33013e+07	6.05883e+07	2.55461e+07	28396701	2.47122e+07	2.68721e+07	C00870	-
Glycylphenylalanine*	223.11	120.08	222.1	[M+H]+	Amino acids and derivatives	1.3118e+06	1.32086e+06	1.30934e+06	1.2043e+06	1.44776e+06	1.36732e+06	1.17468e+06	1.13529e+06	1.02565e+06	-	-
Z-6,7-Epoxyligustilide	189.09	105.07	206.094	[M-H2O+H]+	Others	158822	171278	147756	17539.1	19291.4	27312.3	116955	126989	110704	-	-
5,6,7,3',4',5'-hexamethoxyflavone	403.14	342.11	402.132	[M+H]+	Flavonoids	7.15214e+06	6.92528e+06	7.73485e+06	1.56864e+06	1.49473e+06	1.8108e+06	4.45528e+06	4.29716e+06	4.90722e+06	-	-
Loliolide	197.12	133.1	196.11	[M+H]+	Terpenoids	1.31455e+06	1.28873e+06	1.33915e+06	544530	643118	584102	947520	895255	824175	-	-
Salicylic acid	137.03	108.02	138.032	[M-H]-	Phenolic acids	290480	293312	230242	82049.6	60971.2	70460.5	143734	152602	132708	C00805	ko00996,ko01100,ko01110,ko04075
Lacinartin	261.11	189.06	260.105	[M+H]+	Lignans and Coumarins	3.12611e+07	3.47162e+07	2.735e+07	460373	334690	150550	1.82746e+07	1.63549e+07	1.61274e+07	-	-
Syringetin-3-O-glucoside	509.13	347.08	508.122	[M+H]+	Flavonoids	18333020	14949405	19195990	910005	762505	950005	13181780	12909405	11547755	-	-
Arbutin	271.08	108.02	272.09	[M-H]-	Phenolic acids	97744.6	64642.8	133917	96654.2	99437.8	112991	124777	127646	111741	C06186	ko00010
1-(sn-Glycero-3-phospho)-1D-myo-inositol	333.06	333.06	334.067	[M-H]-	Others	433782	469562	372824	757572	924481	740343	727341	726816	642503	-	-
Trimethyllysine	189.16	84.08	188.153	[M+H]+	Amino acids and derivatives	4.4476e+06	3.62971e+06	4.29751e+06	1.22323e+07	1.23e+07	1.28071e+07	6.27687e+06	7.21527e+06	6.68819e+06	C03793	ko00310,ko01100
12,13-DHOME; (9Z)-12,13-Dihydroxyoctadec-9-enoic acid	313.24	251.24	314.246	[M-H]-	Lipids	390111	343415	358788	151891	120943	135145	209752	233086	240333	C14829	ko00591
Kaempferol-6,8-di-C-glucoside-7-O-glucoside	773.22	611.17	772.206	[M+H]+	Flavonoids	912847	834562	763166	1.80234e+06	1.6991e+06	1.4932e+06	1.15797e+06	1.2903e+06	1.32542e+06	-	-
Hesperetin-5-O-glucoside	463.12	301.07	464.132	[M-H]-	Flavonoids	1.21402e+06	1.1726e+06	856183	1.92345e+06	1.48459e+06	1.8114e+06	1.45918e+06	1.52132e+06	1.32426e+06	-	-
Isopeucenin	261.11	189.06	260.105	[M+H]+	Lignans and Coumarins	2.57222e+06	2.71074e+06	2.26512e+06	32443.4	45364	30259.2	1.29599e+06	1.2168e+06	1.12532e+06	-	-
Oxalic acid	88.99	70.98	89.9953	[M-H]-	Organic acids	100713	39419.7	87040.4	73648.6	85858.6	84948.8	78837.1	68471.9	73355.4	C00209	ko00230,ko00630,ko01100
Araneosol 5-[6''-(3-Hydroxy-3-Methylglutaryl)Glucoside]	681.2	375.11	680.195	[M+H]+	Flavonoids	370421	363697	345971	53159.4	72131.2	56261.7	207217	233534	235946	-	-
Leptene A	277.14	205.09	276.136	[M+H]+	Others	1.50408e+06	1.44214e+06	1.36338e+06	25179.6	49316	35894	920539	798815	857704	-	-
N-Feruloylmethylagmatine	321.19	177.06	320.185	[M+H]+	Alkaloids	4.8736e+07	4.49937e+07	4.38408e+07	1.49642e+07	1.53748e+07	1.44764e+07	2.8887e+07	2.66409e+07	2.50627e+07	-	-
Isoimperatorin	271.1	147.04	270.089	[M+H]+	Lignans and Coumarins	506294	567825	710370	2.34383e+07	2.21534e+07	2.37334e+07	1.31998e+07	1.1771e+07	1.16142e+07	C16976	-
Kaempferol-3-O-(6''-p-Coumaroyl)glucoside (Tiliroside)	593.13	285.04	594.137	[M-H]-	Flavonoids	2.64299e+06	2.63644e+06	2.97466e+06	9.18937e+06	9.91193e+06	8.38984e+06	5.77004e+06	5.05225e+06	5.17975e+06	C17140	-
Nomilin	515.23	161.06	514.22	[M+H]+	Terpenoids	325482	328822	328819	6.02132e+06	6.26541e+06	6.59171e+06	3.06271e+06	3.01298e+06	2.6775e+06	C08773	-
LysoPC 16:2(2n isomer)*	492.31	184.07	491.301	[M+H]+	Lipids	2428.24	3107.48	1846.14	105344	124991	105708	41164.6	37895.5	43777.4	-	-
2,3-Dihydroxanthotoxin	219.07	161.06	218.058	[M+H]+	Lignans and Coumarins	1.23476e+07	1.26622e+07	1.37243e+07	142778	96459.8	99546.5	7.71662e+06	7.20488e+06	6.67959e+06	-	-
L-Homomethionine	164.07	56.05	163.067	[M+H]+	Amino acids and derivatives	115083	119321	128508	2.18299e+06	1.78535e+06	2.09072e+06	864635	917878	997357	C17213	ko00966,ko01110,ko01210
Gallocatechin-(4α→8)-catechin	593.13	285.6	594.137	[M-H]-	Flavonoids	87644.2	112644	121298	31950.7	40073.2	32598.2	101804	88266.7	97472.2	-	-
N-Alpha-Acetyl-L-Asparagine	173.06	58.03	174.064	[M-H]-	Amino acids and derivatives	146123	173843	192323	243933	241147	226818	177306	179639	157095	-	-
7-Geranyloxy-6-methoxycoumarin	329.17	193.05	328.168	[M+H]+	Lignans and Coumarins	1.86273e+07	1.57156e+07	1.33591e+07	3.63483e+06	3.61269e+06	3.00186e+06	1.0129e+07	9.49307e+06	8.75978e+06	-	-
4-Hydroxyphenylacetic acid*	151.04	107.05	152.047	[M-H]-	Phenolic acids	278945	244477	254460	143893	130178	165570	164309	181414	189680	C00642	ko00350,ko00360,ko01100
9-(Arabinosyl)hypoxanthine	267.07	135.03	268.081	[M-H]-	Nucleotides and derivatives	2.29e+06	2.40785e+06	2.02754e+06	840543	747020	865767	1.363e+06	1.33294e+06	1.18708e+06	-	-
Heptadecanoic acid	269.25	269.24	270.256	[M-H]-	Lipids	487807	528308	511487	849465	934325	747661	789543	786755	692764	-	-
Isosakuranetin-7-O-glucoside (Isosakuranin)	449.14	287.1	448.137	[M+H]+	Flavonoids	1.16476e+06	806201	944123	2.82454e+06	2.62483e+06	2.88606e+06	1.50419e+06	1.47464e+06	1.31046e+06	-	-
Anthranilate-1-O-Sophoroside	460.15	117.9	461.153	[M-H]-	Phenolic acids	1.22362e+06	1.18515e+06	758488	1.33631e+06	1.06402e+06	1.62239e+06	1.00402e+06	1.06501e+06	920123	-	-
Feruloylcholine glucoside	442.21	221.08	442.207	[M]+	Alkaloids	51765.6	51550.2	55430.5	143577	132653	135452	82853.5	74008.2	85212.8	-	-
Luteolin-6-C-(2''-glucuronyl)glucoside	625.14	505.09	624.133	[M+H]+	Flavonoids	7.70948e+06	6.49246e+06	6.62362e+06	3.8588e+06	4.51289e+06	2.90656e+06	5.78403e+06	5.30579e+06	5.00492e+06	-	-
D-Pantothenic Acid	220.12	90.05	219.111	[M+H]+	Others	4.8121e+06	5.15145e+06	4.23364e+06	6.76253e+06	6.29372e+06	6.97224e+06	5.56426e+06	6.04179e+06	5.2236e+06	C00864	ko00410,ko00770,ko01100,ko01110,ko01240
5'-Hydroxyauraptene	315.16	163.04	314.152	[M+H]+	Lignans and Coumarins	4.62312e+06	4.04612e+06	4.27631e+06	254808	186125	249284	2.41967e+06	2.80228e+06	2.61109e+06	-	-
5'-Demethoxyepiexcelsin	385.13	173.06	384.121	[M+H]+	Lignans and Coumarins	13203.2	11479.2	13031	84509.1	89894.9	99133.1	35652.8	39559	34430.6	-	-
8-(3,3-dimethylallyl)-6,7-dimethoxycoumarin	275.13	217.06	274.12	[M+H]+	Lignans and Coumarins	408182	426028	373080	51572.7	69838	52262	162521	141856	145660	-	-
2,3,23-Trihydroxyurs-12-en-28-oic acid	487.34	487.34	488.35	[M-H]-	Terpenoids	112661	114634	121101	92373.2	87383.3	115032	84578.9	85269.7	96215.3	-	-
D-Panthenol	206.14	76.08	205.131	[M+H]+	Others	1.63657e+06	416470	244828	793560	313118	133593	482394	485648	424677	C05944	ko00770
Syringetin-7-O-glucoside	509.13	347.08	508.122	[M+H]+	Flavonoids	5.55024e+06	5.14585e+06	4.89018e+06	478543	861627	864339	3.62398e+06	3.12922e+06	3.45414e+06	-	-
Suberosin	245.12	189.06	244.11	[M+H]+	Lignans and Coumarins	3.59835e+07	3.39829e+07	3.40623e+07	1.26991e+06	1.23597e+06	1.12177e+06	2.43862e+07	2.22907e+07	2.10824e+07	-	-
Pinoresinol-3,3-dimethylallyl ether	427.21	175.07	426.204	[M+H]+	Lignans and Coumarins	37094.5	51985.9	42867.3	16857.2	10693.4	11950.4	29648.4	33708.5	33936.8	-	-
5,6-Dimethoxy-8-(3'-methyl-2'-oxobutyl)coumarin	291.12	219.07	290.115	[M+H]+	Lignans and Coumarins	2.72936e+07	2.76637e+07	2.58421e+07	433236	334366	318004	1.84531e+07	1.69411e+07	1.59231e+07	-	-
5-Hydroxy-6,7,3',4'-tetramethoxyflavanone	361.13	197.06	360.121	[M+H]+	Flavonoids	899526	965869	950961	156423	162773	172980	540352	604829	624370	-	-
Elaidic Acid*	281.25	281.25	282.256	[M-H]-	Lipids	2.77833e+07	3.04636e+07	1.29262e+07	2.77226e+07	3.64959e+07	2.48072e+07	3.54847e+07	3.10281e+07	3.15446e+07	C01712	-
L-γ-Glutamyl-L-leucine	261.14	86.1	260.137	[M+H]+	Amino acids and derivatives	386884	375732	482424	444090	347570	459488	388818	345012	397556	-	-
Catechin-5-O-glucoside	451.12	289.07	452.132	[M-H]-	Flavonoids	70394.9	53137.5	63371.2	247504	207077	190687	93289.2	107551	105049	-	-
L-Glutamine	147.08	84.04	146.069	[M+H]+	Amino acids and derivatives	9.09736e+06	7.79627e+06	9.56285e+06	2.13053e+07	1.85816e+07	21811934	1.53751e+07	1.62658e+07	1.78094e+07	C00064	ko00220,ko00230,ko00240,ko00250,ko00470,ko00630,ko00750,ko00910,ko00970,ko01100,ko01230,ko01232,ko01240,ko02010
Neochlorogenic acid (5-O-Caffeoylquinic acid)*	353.09	191.06	354.095	[M-H]-	Phenolic acids	433456	442612	553028	916852	856618	769760	585821	509118	576467	C17147	-
Benzoylmalic acid	237.04	121.03	238.048	[M-H]-	Phenolic acids	9.96028e+06	8.41876e+06	9.82041e+06	1.83719e+07	1.73211e+07	2.07339e+07	1.2313e+07	1.24409e+07	1.08343e+07	-	-
Cirsimaritin (4',5-dihydroxy-6,7-dimethoxyflavone)*	315.09	282.06	314.079	[M+H]+	Flavonoids	1.38061e+07	1.32909e+07	1.14118e+07	3.10694e+06	2.8957e+06	3.27448e+06	8.4646e+06	7.34458e+06	8.30913e+06	C17785	-
Kaempferol-3-O-rhamnosyl(1→2)glucoside	595.16	287.05	594.159	[M+H]+	Flavonoids	292588	266181	306319	1.98244e+06	1.55368e+06	1.74282e+06	1.06241e+06	1.23154e+06	1.1898e+06	-	-
Naringenin-7-O-Neohesperidoside(Naringin)*	579.17	271.06	580.179	[M-H]-	Flavonoids	5.84224e+06	7.10495e+06	8.18748e+06	1.08585e+07	1.48686e+07	1.21536e+07	1.09741e+07	9.51435e+06	9.835e+06	C09789	ko00941
Quercetin-3-O-(2''-O-acetyl)glucuronide	519.08	300	520.085	[M-H]-	Flavonoids	195907	196863	175421	223699	218147	178459	220012	205660	188931	-	-
2'-Deoxycytidine-5'-monophosphate	306.05	110.04	307.057	[M-H]-	Nucleotides and derivatives	2864.91	1382.58	3972.82	58311	78978.7	59344.5	50959.3	44104	45812.9	C00239	ko00240,ko01100,ko01232
Quercetin-3-O-rutinoside-7-O-rhamnoside	757.21	303.05	756.211	[M+H]+	Flavonoids	2.65749e+06	6447070	7500535	2.52396e+06	2.83113e+06	3.7346e+06	2.60502e+06	2.67405e+06	2.31182e+06	-	-
Epicatechin glucoside	451.12	289.07	452.132	[M-H]-	Flavonoids	5642.39	14408.2	9714.16	197308	155003	120205	73614.5	65469.9	75807.1	-	-
L-Phenylalanyl-L-phenylalanine	313.15	166.09	312.147	[M+H]+	Amino acids and derivatives	44715.4	29818.7	48109.3	84455.3	88924.6	84690.6	62462.1	54750.8	55052.6	-	-
D-Xylonic acid	165.04	75.01	166.048	[M-H]-	Others	1.39767e+07	1.55235e+07	1.77202e+07	1.13695e+07	1.13771e+07	1.14774e+07	1.13795e+07	1.32532e+07	1.22993e+07	C00502	ko00040,ko01100
L-Leucyl-L-phenylalanine	279.17	120.08	278.163	[M+H]+	Amino acids and derivatives	774370	691107	747602	879530	878639	901518	749518	643398	700758	-	-
6'-O-Feruloyl-D-sucrose	517.16	175.04	518.164	[M-H]-	Phenolic acids	91379.4	100105	69200.1	46892.4	60301.4	46546.5	65064.7	62139.9	72009.5	-	-
2'-Deoxyadenosine-5'-monophosphate	332.08	136.06	331.068	[M+H]+	Nucleotides and derivatives	94594.6	113618	80677.4	94341.3	98026.7	97158.8	97982.7	84113.1	90452	C00360	ko00230,ko01100,ko01232
2,3-Dihydroxybenzoic Acid*	153.02	109.03	154.027	[M-H]-	Phenolic acids	6.67297e+06	5.76367e+06	6.60839e+06	2.9121e+06	2.90959e+06	2.78921e+06	3.76884e+06	4.39381e+06	4.11435e+06	C00196	ko01110
Protocatechualdehyde	137.02	93.04	138.032	[M-H]-	Phenolic acids	1.28313e+07	1.14513e+07	1.05816e+07	1.81384e+07	1.6532e+07	2.0246e+07	1.22187e+07	1.3927e+07	1.40624e+07	C16700	ko00950
N-(4-hydroxyphenethyl)-N-methylcinnamamide	282.15	121.06	281.142	[M+H]+	Alkaloids	2.07385e+07	1.72408e+07	1.72745e+07	2.91963e+06	3.3804e+06	2.63707e+06	1.17235e+07	1.09686e+07	1.00479e+07	-	-
5,6,7,8,3',4'-Hexamethoxyflavanone	405.15	241.07	404.147	[M+H]+	Flavonoids	104249	59129.1	43724.4	18173.5	4647.44	13682.7	38070	36664.8	32747.2	-	-
γ-Aminobutyric acid	104.07	69.03	103.063	[M+H]+	Organic acids	1.8695e+06	2.12577e+06	2.18194e+06	2.74737e+06	2.97362e+06	3.21754e+06	2.82418e+06	3.21545e+06	2.81751e+06	C00334	ko00250,ko00330,ko00410,ko00650,ko00760,ko01100
Peucenin	261.11	189.05	260.105	[M+H]+	Lignans and Coumarins	8.40699e+06	7.98032e+06	2.52433e+06	285260	96047.9	92516.9	3.97903e+06	4.23383e+06	4.63543e+06	-	-
Kaempferol-3-O-robinoside-7-O-rhamnoside (Robinin)	741.22	433.11	740.216	[M+H]+	Flavonoids	8.28674e+06	9.1182e+06	6.36209e+06	3.64009e+06	3.79874e+06	3.47072e+06	5.98419e+06	5.16249e+06	5.38019e+06	C10178	-
Tachioside	301.09	123.01	302.1	[M-H]-	Phenolic acids	48701.4	48383.9	40988.8	17874.2	19303.8	23097.8	30380.3	28285.4	33005.4	-	-
Decanoic acid	171.14	153.14	172.146	[M-H]-	Organic acids	24381.8	21983.8	20864.8	14634.4	13518	16079.3	14802	17165.7	15432	C01571	ko00061,ko01100
Naringenin-7-O-glucoside (Prunin)*	433.11	271.07	434.121	[M-H]-	Flavonoids	4.8091e+06	6.36098e+06	5.50951e+06	5.94345e+06	5.85441e+06	5.59954e+06	6.6137e+06	6.30536e+06	5.66531e+06	C09099	ko00941
L-Tryptophan	203.08	116.05	204.09	[M-H]-	Amino acids and derivatives	1.79795e+07	2.09656e+07	1.94979e+07	3.3345e+07	3.37091e+07	3.24408e+07	2.29087e+07	2.47256e+07	2.67834e+07	C00078	ko00260,ko00380,ko00400,ko00966,ko00970,ko00996,ko01100,ko01110,ko01210,ko01230,ko01240
Spermine	203.22	84.08	202.216	[M+H]+	Alkaloids	1.15793e+07	1.1084e+07	1.30277e+07	1.51925e+07	1.24839e+07	1.36024e+07	1.33752e+07	1.23793e+07	1.44746e+07	C00750	ko00330,ko00410,ko00480,ko00770,ko01100,ko01240
Osthole	245.12	189.05	244.11	[M+H]+	Lignans and Coumarins	3.59359e+07	3.41088e+07	3.32365e+07	1.22121e+06	1.22181e+06	1.11517e+06	2.51838e+07	2.21234e+07	2.19843e+07	C09280	-
Kaempferol-3-O-(2''-p-Coumaroyl)galactoside	595.14	287.05	594.137	[M+H]+	Flavonoids	2.52721e+07	2.63136e+07	2.73135e+07	3.89531e+07	4.33702e+07	4.12835e+07	3.79059e+07	3.27633e+07	3.37288e+07	-	-
Skimmianine	260.09	216.07	259.084	[M+H]+	Alkaloids	30424.4	33728.4	25816.7	84607.3	105514	67931.2	59188.4	52645.8	51154	C10740	ko00996
Chlorogenic acid methyl ester	367.1	190.9	368.111	[M-H]-	Phenolic acids	528039	423863	438776	81491.2	72830.7	67303.1	169177	145372	164619	-	-
Butin; 7,3',4'-Trihydroxyflavanone*	273.08	153.02	272.068	[M+H]+	Flavonoids	1.55013e+07	1.20677e+07	1.59872e+07	2.14428e+07	2.38025e+07	2.51704e+07	1.85293e+07	1.58014e+07	1.72379e+07	C09614	ko00941
Vitexin-2''-O-glucoside	595.17	577.16	594.159	[M+H]+	Flavonoids	1.54482e+07	1.64958e+07	1.34979e+07	2.27726e+07	2.29349e+07	2.08733e+07	2.12078e+07	1.81282e+07	2.02584e+07	C04024	ko00944
Guanosine	284.1	152.06	283.092	[M+H]+	Nucleotides and derivatives	1.65114e+07	1.72277e+07	1.72977e+07	2.59312e+07	2.186e+07	2.27584e+07	2.01112e+07	1.81905e+07	1.72225e+07	C00387	ko00230,ko01100,ko01232,ko02010
Hesperetin-7-O-(6''-malonyl)glucoside	549.12	387.1	550.132	[M-H]-	Flavonoids	320221	487285	251029	91602.7	69350.2	108343	147053	144845	126823	-	-
6-Hydroxy-7-methoxycoumarin	193.05	133.03	192.042	[M+H]+	Lignans and Coumarins	1.30362e+07	1.3028e+07	1225005	1.13016e+07	1.19708e+07	1.20064e+07	1.30903e+07	1.12773e+07	1.28602e+07	-	-
N-Feruloylputrescine N-glucoside	427.21	177.05	426.2	[M+H]+	Alkaloids	4.00496e+06	4.35922e+06	4.19705e+06	1.13781e+06	1.26333e+06	1.19813e+06	1.61459e+06	1.88542e+06	1.82082e+06	-	-
(S)-2-Phenyloxirane	121.06	77.04	120.058	[M+H]+	Phenolic acids	1.66314e+07	9.47155e+06	2.10571e+07	3.00294e+07	3.1049e+07	28062464	1.98981e+07	1.76731e+07	2.06603e+07	C20782	ko01100
6-Aminocaproic acid	132.1	69.07	131.095	[M+H]+	Organic acids	1.88411e+07	1.32587e+07	1.36951e+07	1.89615e+07	2.87387e+07	2.36961e+07	1.58233e+07	1.75736e+07	1.85596e+07	C02378	ko01100
7-O-Prenyl demethylsuberosin	299.16	187.04	298.157	[M+H]+	Lignans and Coumarins	1.12836e+06	1.03603e+06	1.07825e+06	306033	308025	270614	678161	622081	578172	-	-
Apigenin-6-C-glucoside (Isovitexin)	433.11	313.07	432.106	[M+H]+	Flavonoids	1.02576e+07	1.36516e+07	1.19733e+07	1.26466e+07	1.26605e+07	1.22295e+07	9.43013e+06	1.02415e+07	1.10721e+07	C01714	ko00944
Quercetin-5-O-β-D-glucoside	465.1	303.05	464.096	[M+H]+	Flavonoids	6.14507e+06	7.88492e+06	8.16248e+06	1.13938e+07	8.60991e+06	3772960	8.51353e+06	8.07049e+06	9.43366e+06	-	-
4-Hydroxybenzoic acid	137.02	93.03	138.032	[M-H]-	Phenolic acids	1.55816e+07	1.51215e+07	15115325	2.28113e+07	2.25579e+07	2.63018e+07	1.66887e+07	1.72082e+07	1.93781e+07	C00156	ko00130,ko00790,ko01100,ko01110,ko01240
Epoxyaurapten	315.16	175.04	314.152	[M+H]+	Lignans and Coumarins	471833	462738	591265	114160	91202.7	94156.1	360718	387507	423319	-	-
Methylpicraquassioside A	413.14	136.07	412.137	[M+H]+	Lignans and Coumarins	973725	1.06463e+06	1.18538e+06	1.702e+06	1.62108e+06	1.81547e+06	1.16566e+06	1.36954e+06	1.26625e+06	-	-
Cinnamoyltyramine	268.13	131.05	267.126	[M+H]+	Alkaloids	1.08372e+07	1.00738e+07	1.03894e+07	1.87994e+06	1.9966e+06	1.5453e+06	6.71289e+06	6.28241e+06	5.71103e+06	-	-
Chlorogenic acid (3-O-Caffeoylquinic acid)*	353.09	191.06	354.095	[M-H]-	Phenolic acids	1.26985e+06	1.14481e+06	1.21166e+06	666432	854996	800511	975523	1.1449e+06	1.04592e+06	C00852	ko00940,ko00941,ko00945,ko01110
D-Glucosamine	180.09	163.06	179.079	[M+H]+	Others	470545	380715	332278	360726	412240	402681	265981	312159	284655	C00329	ko00520,ko01100,ko01250
2,6-Dimethoxy-4-hydroxyphenol-1-O-ß-D-glucopyranoside	331.1	108.02	332.111	[M-H]-	Others	47749.3	48335.8	53677.9	52582.8	42302.9	54402.6	40735.3	45752.1	39290.5	-	-
α-Linolenic acid	279.23	149.02	278.225	[M+H]+	Lipids	2.25266e+06	2.42856e+06	2.33796e+06	2.03336e+06	1.855e+06	2.06415e+06	2.24203e+06	2.08555e+06	1.90606e+06	C06427	ko00592,ko01040,ko01100,ko01110
Guanine	152.06	135.03	151.049	[M+H]+	Nucleotides and derivatives	586678	305654	300500	573668	776502	562373	475264	476658	545936	C00242	ko00230,ko01100,ko01232
Calodendrolide(ISO2)	261.11	119.05	260.105	[M+H]+	Alkaloids	845118	805905	710019	41552.6	36303.3	36498.6	544008	499303	462884	-	-
Feruloylcholine	280.15	221.08	280.154	[M]+	Alkaloids	515488	469665	442240	454479	477152	414133	481260	476733	414573	-	-
octadecadienoic acid amide	280.26	81.07	279.256	[M+H]+	Alkaloids	1.63089e+06	1.44718e+06	1.44044e+06	1.7501e+06	1.55377e+06	1.56283e+06	1.75096e+06	1.6844e+06	1.49261e+06	-	-
Isovitexin-8-O-xyloside	565.16	367.1	564.148	[M+H]+	Flavonoids	9.61335e+06	9.27728e+06	7.41282e+06	1.48999e+07	1.43798e+07	1.38901e+07	1.35524e+07	1.2689e+07	1.15053e+07	-	-
5,7,8-trimethoxycoumarin	237.08	207.04	236.069	[M+H]+	Lignans and Coumarins	1.07158e+07	1.30182e+07	8.99455e+06	458746	480912	447697	6.73139e+06	6.0646e+06	5.7366e+06	-	-
Auraptenol	261.11	189.06	260.105	[M+H]+	Lignans and Coumarins	7.81889e+06	8.79532e+06	8.19179e+06	192176	142074	130059	3.99544e+06	3.49826e+06	3.45464e+06	-	-
Xanthosine	283.07	151.03	284.076	[M-H]-	Nucleotides and derivatives	3.64294e+06	3.55735e+06	3.91468e+06	1.1765e+07	8.67231e+06	1.026e+07	7.27465e+06	6.50619e+06	6.21129e+06	C01762	ko00230,ko00232,ko01100,ko01110,ko01232,ko02010
5,7,4',5'-Tetrahydro-3',6-dimethoxyflavone	347.08	332.05	346.069	[M+H]+	Flavonoids	914301	844198	893120	460881	476626	472739	711727	626957	612518	-	-
Syringaresinol-4'-O-(6''-acetyl)glucoside	621.22	417.16	622.226	[M-H]-	Lignans and Coumarins	93240.5	78317.5	104663	88009.3	102971	95282.5	89773.9	99402	84574.1	-	-
Isomeranazin	261.11	201.09	260.105	[M+H]+	Lignans and Coumarins	3.47542e+06	3.70237e+06	3.14908e+06	138772	121973	129475	1.91902e+06	1.85914e+06	1.63646e+06	-	-
Massoniresinol; Vladinol A	391.14	59.01	392.147	[M-H]-	Lignans and Coumarins	387012	378884	716870	187414	471480	362255	516769	538212	457794	-	-
13-KODE; (9Z,11E)-13-Oxooctadeca-9,11-dienoic acid	293.21	235.17	294.219	[M-H]-	Lipids	121927	133101	134360	130319	126196	138194	106579	112841	125257	C14765	ko00591
Nicotinic acid (Vitamin B3)	124.04	78.03	123.032	[M+H]+	Others	2.42777e+06	1.96898e+06	2.00296e+06	1.91358e+06	2.26472e+06	2.07107e+06	1.95316e+06	2.15251e+06	2.30654e+06	C00253	ko00760,ko00960,ko01100,ko01110,ko01240
Luteolin-8-C-glucoside (Orientin)*	449.11	299.05	448.101	[M+H]+	Flavonoids	4.44488e+06	4.38761e+06	3.24575e+06	350621	231346	375443	1.66285e+06	1.94968e+06	1.74283e+06	C10114	-
6-O-Feruloyl-β-D-glucose	355.1	193.05	356.111	[M-H]-	Phenolic acids	230775	277686	277214	180937	125379	177097	193235	227452	217892	-	-
N-(4-methoxyphenethyl)-N-methylcinnamamide	296.16	131.05	295.157	[M+H]+	Alkaloids	1.99507e+07	1.7596e+07	1.95685e+07	1.62459e+06	1.44857e+06	1.4028e+06	1.27992e+07	1.14613e+07	10907780	-	-
Loganic acid	377.15	179.07	376.137	[M+H]+	Terpenoids	51696.1	78136.8	83935.1	15099.7	21975.3	16590.1	41409.2	48904.1	45774.9	C01512	ko00902,ko01110
Lansiumarin A	353.14	203.03	352.131	[M+H]+	Lignans and Coumarins	3.59669e+06	3.4783e+06	4.04177e+06	1.26697e+07	1.22326e+07	1.21356e+07	6.28551e+06	7.4245e+06	6.92052e+06	-	-
Hydroxypyruvic acid	103	59.01	104.011	[M-H]-	Organic acids	4.12969e+06	2.83645e+06	2.99911e+06	4.54877e+06	5.44876e+06	4.76298e+06	3.98412e+06	4.26429e+06	3.61027e+06	C00168	ko00260,ko00630,ko01100,ko01110,ko01200
Isorhamnetin-3-O-(6''-acetylglucoside)	519.11	315.05	520.122	[M-H]-	Flavonoids	566577	334102	355085	533856	451549	425105	550483	498731	467324	-	-
Asn-Ile	246.15	166.09	245.138	[M+H]+	Amino acids and derivatives	728227	472535	690537	971339	969691	1.00117e+06	744024	631316	675373	-	-
Pyrrole-2-carboxylic acid	110.02	66.03	111.032	[M-H]-	Organic acids	419914	353982	412840	462246	480625	491673	354907	410819	412492	C05942	ko00470
Ferulic acid-4-O-glucoside	355.1	193.05	356.111	[M-H]-	Phenolic acids	186383	171343	179995	427366	408030	354798	262433	272765	231597	-	-
Prosogerin E	345.1	312.06	344.09	[M+H]+	Flavonoids	1.21602e+07	1.08832e+07	1.18388e+07	400174	346008	311103	4.59052e+06	5.35577e+06	4.71908e+06	-	-
Riboflavin 5'-Adenosine Diphosphate	784.15	437.09	785.157	[M-H]-	Nucleotides and derivatives	80120	48188.8	63127.4	116033	111182	127034	87900.5	102216	101890	C00016	ko00740,ko01100,ko01110,ko01240
p-Hydroxypheny-β-D-allopyranoside	271.08	108.02	272.09	[M-H]-	Phenolic acids	54291.5	74182.2	60304.9	60465.2	66253.4	78353.8	65115.8	57949	55458.5	-	-
6-Hydroxyhexanoic acid	131.07	85.07	132.079	[M-H]-	Organic acids	191216	198387	197553	208595	266580	238930	168285	167050	193430	C06103	-
N-(4'-O-glycosyl)-feruloyl agmatine	469.23	177.05	468.222	[M+H]+	Alkaloids	241854	264179	280448	69657.9	95396.8	73339.4	135238	133204	154873	-	-
(6R,9R)-3-Oxo-α-ionol-β-D-malonyl-glucoside	457.21	209.15	456.199	[M+H]+	Terpenoids	623727	676414	778214	581868	708807	728358	696327	749949	632277	-	-
Dibutyl phthalate	279.16	149.02	278.152	[M+H]+	Organic acids	2.86053e+07	1.96806e+07	1.92935e+07	1.49449e+07	1.46669e+07	1.4582e+07	1.7626e+07	1.54363e+07	1.51038e+07	C14214	-
Diosmetin-8-C-(2''-O-arabinosyl)glucoside	595.17	445.11	594.159	[M+H]+	Flavonoids	7.05113e+06	6.968e+06	7.56223e+06	2.87395e+06	2.96295e+06	2.63343e+06	5.68909e+06	4.82022e+06	5.09299e+06	-	-
5,7-Dihydroxychromone	177.02	89	178.027	[M-H]-	Others	88673.5	46172.5	80691	140882	71299.4	146924	85203.8	100562	89968.6	C09001	-
N-Monomethyl-L-arginine	189.13	70.07	188.127	[M+H]+	Amino acids and derivatives	451674	512079	582264	1.32832e+06	1.24523e+06	1.27954e+06	972920	1.10961e+06	949526	C03884	-
Monohydroxy-trimethoxyflavone-O-(6''-malonyl)glucoside	577.15	329.1	576.148	[M+H]+	Flavonoids	1.92417e+06	2.22922e+06	1.75874e+06	681621	726851	719708	1.57286e+06	1.40196e+06	1.33405e+06	-	-
3-O-p-Coumaroylshikimic acid	319.08	145.03	320.09	[M-H]-	Phenolic acids	60054.8	97618.2	79844.7	62333.3	57639	92890.5	78801	81436.2	69009.5	-	-
N',N'',N'''-p-Coumaroyl-cinnamoyl-caffeoyl spermidine	584.28	325	583.268	[M+H]+	Alkaloids	501632	475913	428454	659029	573439	520529	465952	430015	510233	-	-
Nepetin-7-O-glucoside(Nepitrin)	479.12	317.06	478.111	[M+H]+	Flavonoids	5.62311e+07	5.53954e+07	5.44207e+07	3.70736e+07	3.8018e+07	3.00171e+07	5.68142e+07	4.79052e+07	5.17067e+07	-	-
moellendorffilin	493.11	247.06	492.106	[M+H]+	Lignans and Coumarins	169484	171739	334946	5.25138e+06	7.76588e+06	6.43733e+06	1.6917e+06	1.82874e+06	1.539e+06	-	-
Xanthine	151.03	108.02	152.033	[M-H]-	Nucleotides and derivatives	173476	132116	197973	208290	168900	160064	147268	124510	141681	C00385	ko00230,ko00232,ko01100,ko01110,ko01232
Xanthomicrol	345.1	312.06	344.09	[M+H]+	Flavonoids	1.21269e+07	1.01308e+07	1.01759e+07	413992	371433	325469	4.5197e+06	5.2989e+06	5.23252e+06	-	-
Hamaudol	277.11	205.05	276.1	[M+H]+	Others	2.8117e+06	3.31213e+06	2.53268e+06	7.2607e+06	8.24643e+06	5.52299e+06	4.25682e+06	4.59973e+06	3.86934e+06	C17483	-
Heraclenol	305.1	203.03	304.095	[M+H]+	Lignans and Coumarins	34030.2	27432	35749.3	2.48135e+06	2.50877e+06	2.91124e+06	736350	674965	619414	-	-
8-Myrcenyl-7-Methoxycoumarin	311.16	189.05	310.157	[M+H]+	Lignans and Coumarins	914470	1.18008e+06	891269	8977.78	12080.7	6488.45	513914	502709	436391	-	-
3,25-Epoxy-3-hydroxyolean-18-en-28-oic acid (Semimoronic acid)	469.33	469.33	470.34	[M-H]-	Terpenoids	43555.7	47285.6	50187.7	140787	167053	129756	98023.1	108035	90921.2	-	-
2-Aminoisobutyric acid	104.07	58.07	103.063	[M+H]+	Organic acids	5.52478e+06	5.43854e+06	5.14811e+06	6.38787e+06	6.2513e+06	6.692e+06	6.06204e+06	6.79309e+06	5.74135e+06	C03665	-
Epicatechin-3'-O-β-D-glucopyranoside	451.13	289.07	452.132	[M-H]-	Flavonoids	9282.84	4218.42	6810.1	220848	151060	138664	85425.2	81101.6	71863.6	-	-
Marmesin O-malonyl glucoside	495.15	247.1	494.142	[M+H]+	Lignans and Coumarins	2.93424e+07	3.25615e+07	3.23054e+07	1.17551e+06	1.02001e+06	2699650	1.78059e+07	1.95572e+07	2.12101e+07	-	-
Isosibiricin	291.12	219.07	290.115	[M+H]+	Lignans and Coumarins	2642787	2.73824e+06	2.75757e+06	19392.3	13124	10488.2	1.42472e+06	1.27146e+06	1.20325e+06	-	-
L-Tyramine	138.09	103.05	137.084	[M+H]+	Alkaloids	2.65742e+07	2.42809e+07	3.4437e+07	2.70085e+07	3.68757e+07	2.8504e+07	2.21621e+07	2.35507e+07	2.62851e+07	C00483	ko00350,ko00950,ko01100,ko01110,ko01240
LysoPE 16:1(2n isomer)*	452.28	311.26	451.27	[M+H]+	Lipids	2233	3238.02	12278.2	118968	142789	119275	44580.9	49425.4	53136.7	-	-
3'-O-Methyltricetin-7-O-(6''-malonyl)glucoside	565.12	317.07	564.111	[M+H]+	Flavonoids	1.40263e+06	1.31965e+06	1.38639e+06	3.93042e+06	3.56083e+06	3.78123e+06	2.4244e+06	2.05812e+06	2.13578e+06	-	-
Phe-Ile	279.17	120.09	278.163	[M+H]+	Amino acids and derivatives	418692	273365	385796	684236	907565	837729	634476	532467	577677	-	-
Cerrosillin	343.12	328.09	342.11	[M+H]+	Flavonoids	469033	506313	488595	47535	38988.5	47244.6	313959	301942	264494	-	-
Isosakuranetin (5,7-Dihydroxy-4'-methoxyflavanone)	287.09	153.02	286.084	[M+H]+	Flavonoids	893213	611702	734042	1.33252e+06	1.14929e+06	1.24852e+06	996678	843157	972343	C05334	ko00941,ko01110
4-Hydroxy-2-oxoglutaric acid	161.01	73.03	162.016	[M-H]-	Organic acids	323247	281000	357290	1.11175e+06	938044	947151	590230	522567	622525	C01127	ko00630,ko01100
3-Aminosalicylic acid	152.04	108.05	153.043	[M-H]-	Phenolic acids	946728	1.00704e+06	986456	388095	370182	422293	564412	673815	632287	-	-
LysoPC 20:3	546.36	184.07	545.348	[M+H]+	Lipids	5222.3	6012.18	4211.3	112181	180963	126691	56161.6	51820.5	47012.8	-	-
Nicotinamide	123.05	80.05	122.048	[M+H]+	Others	4.26901e+06	5.01122e+06	3.78906e+06	7.45382e+06	6.60841e+06	6.79979e+06	4.66232e+06	5.51485e+06	4.8698e+06	C00153	ko00760,ko01100,ko01240
D-Threonic Acid	135.03	75.01	136.037	[M-H]-	Others	3.20566e+06	3.50382e+06	3.93675e+06	7.10661e+06	6.26574e+06	6.89446e+06	5.12205e+06	5.71383e+06	4.79827e+06	C21649	-
Acacetin-7-O-galactoside	447.13	285.08	446.121	[M+H]+	Flavonoids	39613.7	33541.2	27773.2	93093.9	78168.8	108538	53653.8	45699.9	53508.8	-	-
6,7-dihydroxy-1,3-dimethoxyxanthen-9-one	287.05	135.04	288.063	[M-H]-	Flavonoids	1.11845e+06	1.06151e+06	1.35699e+06	276568	240076	235330	817639	775285	684668	-	-
Adenine	136.06	119.04	135.054	[M+H]+	Nucleotides and derivatives	3.91182e+07	3.43393e+07	3.30688e+07	3.31645e+07	3.84216e+07	3.58277e+07	2.86421e+07	31038644	3.42271e+07	C00147	ko00230,ko00908,ko01100,ko01110,ko01232
Sibiricin	291.12	219.07	290.115	[M+H]+	Lignans and Coumarins	403778	364630	365989	5099.76	10005	4462.93	206531	197880	173224	-	-
Isooxypeucedanine	287.09	203.04	286.084	[M+H]+	Lignans and Coumarins	15170.2	12284.7	15897.1	662934	708391	781787	87351	103842	92109.3	-	-
Dihydromyricetin-3-O-glucoside	481.14	319.08	482.106	[M-H]-	Flavonoids	29059.2	20856.2	25800.5	186871	224434	236652	101541	85353.6	90134.7	-	-
Ferulic acid methyl ester	209.08	177.05	208.074	[M+H]+	Phenolic acids	954646	838680	1.03032e+06	366649	391114	303292	713460	602935	702100	-	-
L-Glutamic acid	148.06	84.04	147.053	[M+H]+	Amino acids and derivatives	160464	129717	163635	389660	369397	405223	268622	291541	321733	C00025	ko00220,ko00250,ko00330,ko00340,ko00430,ko00470,ko00480,ko00630,ko00650,ko00660,ko00860,ko00910,ko00970,ko01100,ko01110,ko01200,ko01210,ko01230,ko01240,ko02010
4-Hydroxy-3-methoxymandelate	197.05	153.06	198.053	[M-H]-	Phenolic acids	141204	137809	170762	177753	197925	189337	136881	156384	132017	C05584	ko00350,ko01100
L-Isoleucine*	132.1	86.1	131.095	[M+H]+	Amino acids and derivatives	632910	489428	611256	774858	1.06593e+06	841221	644962	645270	752810	C00407	ko00280,ko00290,ko00460,ko00960,ko00966,ko00970,ko01100,ko01110,ko01210,ko01230,ko02010
4-Pyridoxic acid	184.06	148.04	183.053	[M+H]+	Others	245099	242739	193862	304843	366546	318097	230990	250419	277041	C00847	ko00750,ko01100
Demethylsuberosin	231.1	175.04	230.094	[M+H]+	Lignans and Coumarins	1.25623e+06	1.03379e+06	1.06118e+06	1.4711e+07	1.53458e+07	1.50152e+07	5.17112e+06	4.79226e+06	4.30333e+06	C18083	ko00999,ko01110
1-O-Galloyl-β-D-glucose*	331.07	169.01	332.074	[M-H]-	Phenolic acids	1.34475e+06	1.35899e+06	1.90349e+06	1.7321e+06	1.59466e+06	1.88858e+06	1.46392e+06	1.28747e+06	1.54349e+06	C01158	ko00999
Dimethyl allyl xanthyletin	297.15	163.04	296.141	[M+H]+	Lignans and Coumarins	1.70096e+06	1.40619e+06	1.75658e+06	113724	118100	102670	1.22921e+06	1.02619e+06	1.17407e+06	-	-
Toddalolactone	309.13	205.05	308.126	[M+H]+	Lignans and Coumarins	38537.4	38529.3	42979.8	120679	129227	127329	67621.4	56218	62205.9	-	-
p-Coumaroylputrescine	235.14	147.04	234.137	[M+H]+	Alkaloids	4.29234e+06	4.44643e+06	4.96077e+06	3.65477e+06	3.70046e+06	3.8801e+06	4.05458e+06	3.36998e+06	3.74909e+06	C18326	ko00330,ko01100
N-Feruloylputrescine	265.15	177.06	264.147	[M+H]+	Alkaloids	9.7706e+06	9.75358e+06	8.6545e+06	3.50055e+06	3.47361e+06	3.41455e+06	6.60401e+06	5.50804e+06	5.92053e+06	C10497	ko00330,ko01100
Eicosadienoic acid	307.26	307.26	308.272	[M-H]-	Lipids	3.96923e+06	3.698e+06	4.44261e+06	1.12858e+07	1.21721e+07	6.70032e+06	1.1014e+07	1.22712e+07	1.32691e+07	C16525	ko01040
Pro-Trp	302.15	188.07	301.143	[M+H]+	Amino acids and derivatives	39640.8	54550.3	61669.2	82293.3	81984.5	90803.3	72166.3	63298.9	60551.4	-	-
Casticin (5,3'-Dihydroxy-3,6,7,4'-Tetramethoxyflavone)	375.11	342.07	374.1	[M+H]+	Flavonoids	721839	552564	506314	184800	216100	207454	416000	428140	493064	-	-
Methyl linolenate	293.25	95.09	292.24	[M+H]+	Lipids	821490	741422	645587	202647	184859	171587	229221	208057	190276	-	-
Chrysoeriol-7-O-(6''-malonyl)glucoside	549.12	301.07	548.117	[M+H]+	Flavonoids	1.02929e+06	659603	521252	111441	140659	184624	709715	609297	603399	-	-
(1'R,3R,5R,8'S)-Dihydrophaseic acid-O-β-D-glucoside	443.19	161.04	444.2	[M-H]-	Phenolic acids	63736.7	79847.4	71081.1	88849.4	92880.5	81951.5	87175	82928.9	72488.3	-	-
Cis-10-Pentadecenoic Acid(C15:1)	239.2	223.03	240.209	[M-H]-	Lipids	260779	495204	269918	266334	252813	165230	452002	532121	536115	-	-
5-Hydroxy-4',6,7-trimethoxyflavone (Salvigenin)	329.1	296.07	328.095	[M+H]+	Flavonoids	533934	564365	510800	65435.1	66517.4	58715.4	371763	327348	310796	-	-
LysoPC 16:1(2n isomer)*	494.32	184.07	493.317	[M+H]+	Lipids	27290	12858.6	101633	631682	1.00471e+06	854059	334267	349090	290532	-	-
Nepetin (5,7,3',4'-Tetrahydroxy-6-methoxyflavone)	317.07	302.04	316.058	[M+H]+	Flavonoids	420510	68973.6	503284	1.33753e+06	1.05444e+06	1.30206e+06	619552	734763	635425	-	-
Syringaldehyde; 4-Hydroxy-3,5-Dimethoxybenzaldehyde	181.05	151	182.058	[M-H]-	Phenolic acids	72447.4	75265.3	82401.4	43690.3	46455.3	28206.3	42395.3	50812.4	49221.4	-	-
Justicidin A*	395.11	365.06	394.105	[M+H]+	Lignans and Coumarins	2.17111e+06	1.65979e+06	1.6704e+06	104861	108051	105185	1.27351e+06	1.47921e+06	1.25017e+06	C10633	-
2-O-Caffeoylglucaric Acid	371.06	209.03	372.069	[M-H]-	Phenolic acids	1.93806e+07	1.89298e+07	2.03815e+07	1.37029e+07	1.4648e+07	1.19557e+07	1.38945e+07	1.45907e+07	1.66281e+07	C03062	-
N-(2-Hydroxy-4-methoxyphenyl)acetamide	182.08	91.05	181.074	[M+H]+	Alkaloids	1.14721e+07	8.79764e+06	8.62691e+06	1.39391e+07	1.7076e+07	1.45841e+07	1.08489e+07	1.14679e+07	1.30137e+07	-	-
N-Monocinnamoylputrescine	219.15	131.05	218.142	[M+H]+	Alkaloids	659873	758397	717330	264670	304887	254835	387165	463857	407286	-	-
Xylitol	151.06	59	152.069	[M-H]-	Others	345461	268430	313571	164648	137890	178824	158389	191009	182361	C00379	ko00040,ko01100,ko02010
Tyrosol; 4-Hydroxyphenylethanol	137.06	119.05	138.068	[M-H]-	Phenolic acids	125875	103192	113243	68804.7	55678.2	55321.6	69420.9	61139.6	73977.9	C06044	ko00350,ko01100
Picrocrocin	331.18	169.12	330.168	[M+H]+	Others	1.82063e+06	2.22736e+06	2.12654e+06	1.18372e+06	1.60827e+06	1.04687e+06	1.3877e+06	1.49779e+06	1.67561e+06	-	-
Jasminoside A	331.18	169.12	330.168	[M+H]+	Others	1.82063e+06	2.22736e+06	2.12654e+06	1.18372e+06	1.60827e+06	1.04687e+06	1.3877e+06	1.49779e+06	1.67561e+06	-	-
2,5-Dihydroxybenzaldehyde	137.02	93.03	138.032	[M-H]-	Phenolic acids	1.40609e+07	1.21922e+07	1.3401e+07	1.94926e+07	1.95466e+07	2.39038e+07	1.31928e+07	1.51139e+07	1.59662e+07	C05585	ko00350,ko01100
8-(3'-hydroxyisopentyl)-7-methoxycoumarin	263.13	131.05	262.12	[M+H]+	Lignans and Coumarins	281147	234967	219644	9732.04	11215.8	8520.58	127500	118043	105080	-	-
L-Valyl-L-Phenylalanine	265.15	72.08	264.147	[M+H]+	Amino acids and derivatives	3.90778e+06	3.09648e+06	2.93152e+06	3.08129e+06	2.9403e+06	3.5254e+06	3.11099e+06	2.71645e+06	3.28849e+06	-	-
Chrysoeriol-7-O-rutinoside-5-O-glucoside	771.23	463.2	770.227	[M+H]+	Flavonoids	239585	448752	387686	158640	196195	203282	271386	325869	285024	-	-
Natsudaidain-3-O-(3-hydroxy-3-methylglutarate)glucoside	725.23	419.1	724.221	[M+H]+	Flavonoids	2.14292e+07	2.01837e+07	1.78294e+07	9.02767e+06	7.79222e+06	9.32121e+06	1.22949e+07	1.12573e+07	1.36413e+07	-	-
Perlolyrine	265.1	247.09	264.09	[M+H]+	Alkaloids	77505	44373.1	45278.6	547228	606118	1565005	670005	627505	552505	C09231	-
Cycloleucine	130.09	84.08	129.079	[M+H]+	Amino acids and derivatives	4.28558e+07	5.43862e+07	1.21756e+07	3.83638e+07	4.10889e+07	3.88348e+07	3.85356e+07	4.67861e+07	4.3151e+07	C03969	-
Acteoside; Verbascoside	623.2	461.17	624.205	[M-H]-	Phenolic acids	100741	120557	73066.4	142677	108944	147101	124428	105073	106244	C10501	-
Feruloylsinapoyltartaric acid	531.12	337.06	532.122	[M-H]-	Phenolic acids	179138	158640	164332	45241.7	28355.3	37417.7	102091	84013.2	93601.5	-	-
methyl-8,11,14-heptadecatrienoate	279.23	149.02	278.225	[M+H]+	Lipids	2.26654e+06	2.49311e+06	2.52526e+06	2.09622e+06	1.93063e+06	1.95772e+06	2.28272e+06	2.02251e+06	1.88858e+06	-	-
Dihydrocharcone-4'-O-glucoside	435.13	273.08	436.137	[M-H]-	Flavonoids	113606	144430	152608	83484.1	65447.9	64371.6	86066.4	104394	93417.5	-	-
N,N'-Dimethylarginine;SDMA*	203.15	70.07	202.143	[M+H]+	Amino acids and derivatives	603347	667677	610316	1.22066e+06	1.20701e+06	1.28423e+06	898626	1.0867e+06	957765	-	-
Tetracosanoic Acid (Lignoceric acid)	367.36	367.36	368.365	[M-H]-	Lipids	70553.9	92634.2	92067.8	100045	42124.3	80120.9	58670.4	68285.5	71008	C08320	ko01040
Vnilloyltartaric acid	299.04	167.03	300.048	[M-H]-	Phenolic acids	28972.4	30255.2	32714.8	41950.6	45741.1	47896.6	40619.3	34288.8	41101.2	-	-
4-Methyl-5-thiazoleethanol	144.05	113.03	143.041	[M+H]+	Others	545635	493516	584301	573867	716184	724384	456000	492937	553557	C04294	ko00730,ko01100,ko01240
Phloretin-4'-O-glucoside (Trilobatin)	435.13	315.09	436.137	[M-H]-	Flavonoids	1.05308e+06	1.05154e+06	1.16304e+06	2.16782e+06	1.7832e+06	1.66537e+06	1.5364e+06	1.47068e+06	1.76885e+06	-	-
Kaempferol-4'-O-glucoside*	449.11	287.06	448.101	[M+H]+	Flavonoids	1.54727e+06	987505	1.31596e+06	3.80272e+06	8291500	4.52298e+06	1937505	1.86315e+06	2237505	-	-
Chrysoeriol-7-O-rutinoside	607.17	299	608.174	[M-H]-	Flavonoids	6.06243e+06	7.12702e+06	6.95975e+06	3.80111e+06	3.56154e+06	2.96699e+06	5.11107e+06	5.76016e+06	4.748e+06	-	-
D-Galactaric acid	209.03	85.03	210.038	[M-H]-	Others	1.15087e+07	1.04419e+07	1.10669e+07	1.39053e+07	1.47306e+07	1.49953e+07	1.31044e+07	1.0748e+07	1.19611e+07	C00879	ko00053,ko01100
Taxifolin-3'-O-glucoside	465.13	303.05	466.111	[M-H]-	Flavonoids	821621	161355	129538	585905	627018	604261	647194	694491	785416	-	-
Limocitrin-7-O-(6''-Acetyl)glucoside	549.12	345.06	550.132	[M-H]-	Flavonoids	1.95015e+06	1.74678e+06	1.73653e+06	985018	713242	668321	1.41343e+06	1.25257e+06	1.52897e+06	-	-
Glutaric acid*	131.03	87.05	132.042	[M-H]-	Organic acids	536772	477192	458086	1.28858e+06	849425	1.22543e+06	722941	614584	607835	C00489	ko00071,ko00310,ko01100
Sinapoylputrescine	295.17	207.07	294.158	[M+H]+	Alkaloids	108490	103032	80378.3	294062	339040	270159	189020	195746	161442	-	-
Dihydrovomifoliol 4-O-malonyl glucoside	475.21	209.15	474.21	[M+H]+	Others	196697	126975	176747	40092.8	145005	108039	120020	101918	100899	-	-
Apigenin-6-C-(2''-xylosyl)glucoside	565.16	433.11	564.148	[M+H]+	Flavonoids	331730	396911	392932	937687	718894	827131	564092	480108	581451	-	-
Isorhamnetin-3-O-neohesperidoside*	625.17	317.07	624.169	[M+H]+	Flavonoids	3586580	4901985	4627955	12817810	21037260	18144930	15277005	12853885	12953835	-	-
Quercetin-4'-O-glucoside (Spiraeoside)*	463.09	301.04	464.096	[M-H]-	Flavonoids	1.10063e+06	1.15666e+06	1.00003e+06	1.97779e+06	2.14597e+06	1.57534e+06	1.42253e+06	1.2867e+06	1.1641e+06	-	-
6-Deoxyfagomine	132.1	57.03	131.095	[M+H]+	Alkaloids	4.032e+06	2.74441e+06	2.73612e+06	4.0551e+06	5.62704e+06	4.72749e+06	3.31802e+06	3.68637e+06	4.05661e+06	-	-
3,4-dihydroxy-allylbenzene-3-O-β-D-glucopyranoside	311.11	59.01	312.121	[M-H]-	Phenolic acids	44882.5	38392.5	38491.5	43400.6	39948.9	33402.1	33327.2	40509.5	38874.9	-	-
Cirsilineol 5-[6''-(3-Hydroxy-3-Methylglutaryl)Glucoside]	651.19	345.1	650.185	[M+H]+	Flavonoids	3.07003e+07	3.14633e+07	2.94567e+07	1.28096e+06	750651	927168	1.90395e+07	1.56445e+07	1.81906e+07	-	-
Acetryptine	203.12	144.08	202.111	[M+H]+	Alkaloids	295681	51555.1	143608	607542	18506	106618	135107	163358	159663	-	-
Trihydroxycinnamoylquinic acid	371.1	249.06	372.106	[M-H]-	Phenolic acids	482477	441001	435895	79144.9	72538.8	73065	189398	226543	227038	-	-
Luteolin (5,7,3',4'-Tetrahydroxyflavone)	287.06	153.02	286.048	[M+H]+	Flavonoids	321892	316004	342792	585553	665244	597871	505629	464295	567388	C01514	ko00941,ko00944,ko01100,ko01110
DL-Leucine	132.1	86.1	131.095	[M+H]+	Amino acids and derivatives	2.09408e+07	1.64742e+07	1.80912e+07	2.3183e+07	3.25144e+07	2.75698e+07	1.94417e+07	2.16892e+07	2.38262e+07	-	-
3',4'-Dihydroxy-7,5'-dimethoxyflavone	315.09	300.06	314.079	[M+H]+	Flavonoids	8.27041e+06	8.0649e+06	6.50161e+06	1.97914e+06	1.76207e+06	1.78789e+06	4.99471e+06	4.68219e+06	4.08081e+06	-	-
L-Citramalic acid	147.03	87.01	148.037	[M-H]-	Organic acids	898853	736240	763769	928767	1.42137e+06	1.05812e+06	829317	751179	919982	C02614	ko00660,ko01100
Naringenin-7-O-Rutinoside-4'-O-glucoside	741.23	579.18	742.232	[M-H]-	Flavonoids	6.67194e+06	7.20454e+06	7.28759e+06	2.58228e+06	3.3191e+06	3.47567e+06	5.03701e+06	6.13725e+06	5.39691e+06	-	-
Cytidine	244.09	112.05	243.085	[M+H]+	Nucleotides and derivatives	1.41136e+07	1.30097e+07	1.20168e+07	7.02747e+06	7.50696e+06	8.50182e+06	1.07088e+07	1.28923e+07	1.10469e+07	C00475	ko00240,ko01100,ko01232,ko02010
Tricin-7-O-saccharic acid	521.09	329.2	522.101	[M-H]-	Flavonoids	36833.5	75324.7	68751.2	15644.5	4619.05	10092.5	40490.1	36329	44591.3	-	-
4,6-Dihydroxyquinoline	162.06	116.05	161.048	[M+H]+	Alkaloids	62819	63911.5	63911.5	18403.2	36333.9	28042.6	41207.6	45822.3	37347.6	C05639	ko00380,ko01100
5,6,7,8-Tetramethoxyflavone	343.12	313.07	342.11	[M+H]+	Others	2.76057e+06	2.93056e+06	2.39712e+06	348465	335648	355097	2.06586e+06	1.98842e+06	1.69383e+06	-	-
Meranzin hydrate	279.09	243.1	278.115	[M+H]+	Lignans and Coumarins	99737.1	139271	129387	5005	20005	2700.6	71349.1	83605.3	69464.4	-	-
4-O-Glucosyl-sinapate	385.11	223.06	386.121	[M-H]-	Phenolic acids	534202	474519	443699	507791	548772	447048	312838	384607	356734	C02919	-
LysoPG 16:0	483.27	255.23	484.28	[M-H]-	Lipids	325466	284165	265192	360650	407495	483752	341700	404357	337990	-	-
Digalloylglucose	483.08	169.05	484.085	[M-H]-	Phenolic acids	68933.4	61279.1	92840.1	21567.8	25074	19236.3	32658.9	38890.3	39633.1	-	-
Auraptenol diglucoside	585.22	261.11	584.211	[M+H]+	Lignans and Coumarins	6.78602e+06	7.20873e+06	7.41513e+06	25005	57222.6	53477.6	4.7559e+06	5.09813e+06	4.1458e+06	-	-
5'-Methoxymatairesinoside	549.2	387.15	550.205	[M-H]-	Lignans and Coumarins	258333	201369	262862	41407.8	57740.4	36911.5	106874	130125	112942	-	-
Columbianetin O-malonyl glucoside	495.15	247.1	494.142	[M+H]+	Lignans and Coumarins	3.35452e+07	3.24624e+07	2.8707e+07	1.34573e+06	1.10683e+06	1.03058e+06	1.78449e+07	2.16542e+07	2.12669e+07	-	-
N-(4-methoxyphenethyl)cinnamamide	282.15	135.08	281.142	[M+H]+	Alkaloids	1.52854e+06	1.24809e+06	1.51263e+06	143115	117075	110086	938378	793700	782989	-	-
5-Oxoproline	128.04	82.03	129.043	[M-H]-	Amino acids and derivatives	46635.1	38357.2	68367.3	66327.5	76578.1	56996.7	46290.7	53462.3	43932.2	C02237	ko00470,ko01100
Eriodictyol-7-O-glucoside	451.12	289.07	450.116	[M+H]+	Flavonoids	5409775	4115340	7631145	1090005	1005005	795005	5252520	4823635	5924775	-	-
4,4'-Dihydroxy-2'-methoxychalcone (3-Deoxysappanchalcone)	271.1	147.03	270.089	[M+H]+	Flavonoids	5708.1	5723.59	21535	76238.4	81531	91858.5	59629.8	52894.9	48499.4	C15531	-
Citpressine I	300.09	270.04	301.095	[M-H]-	Alkaloids	218219	188450	250975	4842.83	6714.83	15595	106921	99766.2	86703.4	-	-
9-Oxo-12Z-Octadecenoic acid	297.24	81.07	296.235	[M+H]+	Lipids	587069	589354	446405	395953	357240	426163	537092	435923	479374	-	-
3,5,7,3'4'-Pentamethoxyflavone	373.13	343.08	372.121	[M+H]+	Flavonoids	1.90117e+06	1.84379e+06	1.89017e+06	149046	158800	137919	1.35631e+06	1.25485e+06	1.09864e+06	-	-
N-(beta-D-Glucosyl)nicotinate	286.09	124.04	285.085	[M+H]+	Others	186236	168614	185110	89048.1	108255	95022.7	141602	139550	116506	-	-
Isohyperoside	465.1	303.06	464.096	[M+H]+	Flavonoids	8.76469e+06	8.93164e+06	9.97505e+06	9.92176e+06	7.64333e+06	9.65247e+06	9.00107e+06	1.00363e+07	1.11198e+07	-	-
1-Feruloyl-sn-glycerol	269.1	177.05	268.095	[M+H]+	Phenolic acids	335132	308554	247746	528396	521200	342049	350723	430546	413260	-	-
LysoPE 17:1	466.29	325.27	465.286	[M+H]+	Lipids	12776.1	6422.2	15862.2	102857	155372	115682	47838.8	51748.7	58855.2	-	-
5,7,8,4'-Tetramethoxyflavone	343.12	313.08	342.11	[M+H]+	Flavonoids	2.4311e+06	2.4521e+06	2.28852e+06	246154	264531	237315	1.60591e+06	1.34497e+06	1.34128e+06	-	-
D-Galacturonic acid*	193.04	72.99	194.043	[M-H]-	Others	219376	137205	183796	106021	90027.8	89006.4	88547.3	106507	89598.7	C00333	ko00040,ko00053,ko00520,ko01100,ko01240,ko01250,ko02010
Antiarol; 3,4,5-Trimethoxyphenol	185.08	125.06	184.074	[M+H]+	Phenolic acids	36407.8	82505	60005	28743.8	35468.3	48861.8	60357.8	65005	52505	C10765	-
Monohydroxy-trimethoxyflavone*	329.1	314.08	328.095	[M+H]+	Flavonoids	1.27885e+06	2.99711e+06	2.52904e+06	425755	470427	473884	1.28827e+06	1.54645e+06	1.57244e+06	-	-
L-Ornithine	133.1	116.07	132.09	[M+H]+	Amino acids and derivatives	939350	790295	1.17509e+06	1.08957e+06	1.04057e+06	743789	1.32983e+06	1.11108e+06	1.3597e+06	C00077	ko00220,ko00330,ko00470,ko00480,ko01100,ko01110,ko01210,ko01230,ko02010
7-Methoxy-5-Prenyloxycoumarin	261.11	189.06	260.105	[M+H]+	Lignans and Coumarins	7.82505e+06	8.18959e+06	6.91639e+06	130351	112936	145570	4.39212e+06	3.57039e+06	3.82271e+06	-	-
Daphnetin	177.02	121.03	178.027	[M-H]-	Lignans and Coumarins	53966.8	53869.9	65289.9	30410.3	23655	123754	31965.5	37649.8	30997.7	C03093	-
Pyridoxal	168.06	150.05	167.058	[M+H]+	Others	5.74128e+07	5.95239e+07	4.88522e+07	3.76416e+07	3.93543e+07	5.4321e+07	2.58055e+07	3.18956e+07	2.8191e+07	C00250	ko00750,ko01100,ko01240
Luteolin-7-O-(2''-O-rhamnosyl)rutinoside	741.23	433.12	740.216	[M+H]+	Flavonoids	8.41805e+06	9.41216e+06	9.72962e+06	2.78301e+06	3.48925e+06	2.96239e+06	6.09975e+06	4.92334e+06	5.43327e+06	-	-
Acacetin*	285.08	242.05	284.068	[M+H]+	Flavonoids	29290.6	25391	26642.9	48350.2	44992.8	49127.7	28979.7	33773.7	35915.3	C01470	ko00944
5,6,7,4'-Tetramethoxyflavone	343.12	282.09	342.11	[M+H]+	Flavonoids	2.12513e+06	2.42331e+06	2.09579e+06	290798	262770	276576	1.75702e+06	1.48296e+06	1.4476e+06	C14472	-
Syringetin-3-O-(6''-Acetyl)glucoside	551.14	347.08	550.132	[M+H]+	Flavonoids	576236	624919	590101	481463	416701	377877	554170	525126	447378	-	-
(S)-Indoximod	219.11	132.09	218.106	[M+H]+	Alkaloids	181985	233979	228390	219461	162606	245658	192784	183382	224881	-	-
Chrysoeriol-7-O-gentiobioside	625.18	301.07	624.169	[M+H]+	Flavonoids	438738	447857	486359	937505	596655	865005	653239	543029	545042	-	-
Butyl Beta-D-Fructopyranoside	235.12	59.01	236.126	[M-H]-	Others	140474	133219	161608	10760.1	8005.54	4712.38	47650.6	59272.6	54861.6	-	-
5-Methyluridine	257.08	125.04	258.085	[M-H]-	Nucleotides and derivatives	59088.2	46944.1	49623.5	84399.1	73566.1	71747.8	65098.8	57039.7	52573.1	-	-
Zanthoxylumamide E(ISO1)	282.21	147.12	281.199	[M+H]+	Alkaloids	102273	118674	107097	14479	13480.4	2505	55000.4	67542.1	57894.6	-	-
Boscialin 4-O-malonyl glucoside	475.22	227.16	474.21	[M+H]+	Others	128950	162912	175594	16587.4	41907.9	27505	75743	91238.6	76092.9	-	-
Pentadecanoic acid,14-methyl-,methyl ester	269.25	269.25	270.256	[M-H]-	Others	1.73112e+06	2.05876e+06	2.00573e+06	2.56391e+07	2.31238e+07	1.65185e+07	2.44875e+07	2.8469e+07	3.04815e+07	-	-
8-Hydroxy-4',5,7-trimethoxyflavone*	329.1	299.06	328.095	[M+H]+	Flavonoids	8.93085e+06	6.07051e+06	6.63125e+06	3.59177e+06	3.814e+06	3.93739e+06	5.84367e+06	4.69635e+06	5.19009e+06	-	-
6-Hydroxykaempferol-3-O-Rutinoside-6-O-glucoside	773.21	303.05	772.206	[M+H]+	Flavonoids	1.79057e+06	1.9745e+06	1.74735e+06	2.98822e+06	11067815	3.79193e+06	3.22276e+06	2.64715e+06	2.71626e+06	-	-
3,5,6,7-Tetramethoxyflavone	343.12	313.07	342.11	[M+H]+	Flavonoids	3.19573e+06	3.53129e+06	2.94491e+06	448823	426297	437394	2.50483e+06	2.15887e+06	2.03047e+06	-	-
LysoPC 19:2*	534.36	184.07	533.348	[M+H]+	Lipids	15793.1	12059.9	16656.2	77331.6	196525	116428	44920.7	38647.9	48146.6	-	-
Tricin-7-O-(2''-feruloyl)glucoside	669.18	331.08	668.174	[M+H]+	Flavonoids	64052	54260.8	70266.6	5520.81	2849.78	4557.89	36966.1	29820.3	35341.5	-	-
Isorhamnetin-3-O-(6''-malonyl)glucoside-7-O-glucoside	727.17	479.11	726.164	[M+H]+	Flavonoids	41912.3	43186.2	53111.5	52431.9	61653.9	47428.2	55136.6	62916	50663.3	-	-
Phloretin-2'-O-glucoside (Phlorizin)	437.14	275.09	436.137	[M+H]+	Flavonoids	312505	111348	282505	445005	607505	647505	412505	470005	515005	C01604	ko00941,ko01110
Kaempferol-3-O-galactoside (Trifolin)	447.09	285.04	448.101	[M-H]-	Flavonoids	120419	237117	334290	178002	210562	179060	211137	217817	176347	C12626	ko00944,ko01110
Quercetin-3-O-(2''-O-rhamnosyl)galactoside	611.16	303.05	610.153	[M+H]+	Flavonoids	1.26107e+06	1.62025e+06	1.68414e+06	3.51498e+06	3.62086e+06	2025005	3.43862e+06	2.77799e+06	2.97366e+06	-	-
6-methyl luteolin	301.07	167.03	300.063	[M+H]+	Flavonoids	79693.6	58662.2	57455.1	30532.1	21797.2	36680.1	54014.4	45636.9	44145.5	-	-
Val-Pro	215.14	116.07	214.132	[M+H]+	Amino acids and derivatives	2.1926e+06	1.37453e+06	407449	2.28818e+06	2.42861e+06	2.40577e+06	1.72342e+06	1.46372e+06	1.82309e+06	-	-
5-Aminoimidazole ribonucleotide	296.07	104.11	295.057	[M+H]+	Nucleotides and derivatives	2.24058e+06	2.08082e+06	1.27609e+06	1.07527e+06	1.05046e+06	1.14134e+06	1.47409e+06	1.61154e+06	1.28826e+06	-	-
Uric acid	167.02	124.01	168.028	[M-H]-	Nucleotides and derivatives	153255	138946	140080	223466	288800	239503	161964	202625	184276	-	-
Bergapten	217.04	202.03	216.042	[M+H]+	Lignans and Coumarins	5.36425e+06	5.1874e+06	4.1167e+06	8.33356e+06	7.56839e+06	6.59491e+06	6.61726e+06	5.80297e+06	5.31437e+06	C01557	ko00999,ko01110
2-O-Galloyl-D-glucose	331.07	169.01	332.074	[M-H]-	Phenolic acids	1.28292e+06	1.36334e+06	1.88196e+06	1.85484e+06	1.64387e+06	1.9406e+06	1.50194e+06	1.2124e+06	1.45248e+06	-	-
Koaburaside	331.1	153.02	332.111	[M-H]-	Phenolic acids	45631.1	54310.8	49444.8	113094	110697	114142	98167.2	79190.7	94919	-	-
Aucubin	345.12	183.07	346.126	[M-H]-	Terpenoids	179713	172412	197853	78297.9	70672.9	63894.7	132132	108392	110680	C09771	-
Yuehgesin	293.14	219.06	292.131	[M+H]+	Lignans and Coumarins	117065	130093	132387	7659.55	8342.36	17625	74771.5	75536.7	61489.2	-	-
Isorhamnetin-3-O-(6''-malonyl)glucoside	565.12	317.08	564.111	[M+H]+	Flavonoids	1.50232e+06	1.51548e+06	1.38218e+06	3.32098e+06	3.28532e+06	3.47809e+06	2.12433e+06	1.71058e+06	1.83834e+06	-	-
Quercetin-3-O-arabinoside	433.08	300.03	434.085	[M-H]-	Flavonoids	69152	57637.6	59552.7	52690.2	60593.8	44851.6	76635.4	63002.3	77430	-	-
6-(2,3-Dihydroxy-3-methylbutyl)-7-methoxycoumarin	279.12	189.05	278.115	[M+H]+	Lignans and Coumarins	4.88869e+06	5.9342e+06	4.73011e+06	78173.1	78173.1	89004.6	2.49258e+06	2.93471e+06	3.1152e+06	-	-
Toddanin	279.12	189.05	278.115	[M+H]+	Lignans and Coumarins	4.88869e+06	5.9342e+06	4.73011e+06	78173.1	78173.1	89004.6	2.49258e+06	2.93471e+06	3.1152e+06	-	-
O-MethylNaringenin-8-C-arabinoside	419.13	383.1	418.126	[M+H]+	Flavonoids	322992	590005	845005	492840	358108	486879	617221	536716	495453	-	-
Trans-5-O-(p-Coumaroyl)shikimate	321.1	147.04	320.09	[M+H]+	Phenolic acids	820282	725601	649957	547907	538069	662576	734982	613022	603113	C02947	ko00940,ko00941,ko00945,ko01100,ko01110
Dehydrodiconiferyl alcohol-gamma'-O-glucoside	521.2	131.05	520.194	[M+H]+	Phenolic acids	621009	682495	685876	149655	91679.2	81311	361580	292279	354578	-	-
Eriodictyol-8-C-glucoside-4'-O-glucoside	613.18	451.1	612.169	[M+H]+	Flavonoids	46116.2	18878	51696	370387	323445	387176	242945	305243	274037	-	-
L-Asparagine	133.06	74.02	132.054	[M+H]+	Amino acids and derivatives	8.12326e+06	1.11927e+07	1.00254e+07	8.82513e+06	8.51968e+06	1.06771e+07	1.05732e+07	1.21503e+07	1.3313e+07	C00152	ko00250,ko00460,ko00970,ko01100,ko01110,ko01230
Pseudopelletierine	154.12	112.11	153.115	[M+H]+	Alkaloids	257496	210533	209041	1.20062e+06	1.4545e+06	1.6252e+06	588975	676132	742025	C10865	ko00960,ko01110
Fraxetin-8-O-glucoside (Fraxin)	369.09	207.03	370.09	[M-H]-	Lignans and Coumarins	74741.7	79218.8	92980.3	18966.1	30223	15257.3	50954.4	44250.9	55789.3	C09266	-
methyl 5-caffeoylquinate	369.12	177.06	368.111	[M+H]+	Phenolic acids	1.77142e+06	1.69359e+06	1.67761e+06	614619	594747	437484	812771	947875	1.02389e+06	-	-
L-Tartaric acid	149.01	87.01	150.016	[M-H]-	Organic acids	68793.6	101821	101198	127044	86262.3	153190	81435.7	91798.3	102631	C00898	ko00630,ko01100
D-Glucosyl Indole-3-Carboxylate	324.11	162.06	323.101	[M+H]+	Alkaloids	277501	350498	309341	47813.7	30857.2	53901.3	160797	142416	127619	-	-
9-Oxo-10E,12Z-octadecadienoic acid	293.21	275.2	294.219	[M-H]-	Lipids	409809	379093	408992	597615	502011	923373	497970	396869	431185	C14766	ko00591
γ-Glutamyl-L-valine	247.13	184.1	246.122	[M+H]+	Amino acids and derivatives	291528	132740	173304	193551	328821	214039	160805	127172	144637	-	-
Agmatine	131.13	114.1	130.122	[M+H]+	Alkaloids	523867	582339	495147	279392	321247	370052	344659	428576	362666	C00179	ko00330,ko01100
4-Methoxyfuro(2,3-b)quinolin-7-ol	216.07	201.04	215.058	[M+H]+	Alkaloids	160954	146540	156868	30386.2	29248.3	27696.8	99903.4	79004.9	88755.1	-	-
2-Methoxy-1-benzofuran-5-carbaldehyde	177.06	117.03	176.047	[M+H]+	Others	7.17037e+06	8.84596e+06	9.38037e+06	2.76614e+06	2.43856e+06	2.53839e+06	7.29225e+06	6.68993e+06	8.42612e+06	-	-
Taxifolin(Dihydroquercetin)	303.05	125.02	304.058	[M-H]-	Flavonoids	42631.9	24705.9	57560.8	123733	104807	48897.3	57607.8	71701.4	60391.4	C01617	ko00941,ko01100,ko01110
2-(Formylamino)benzoic acid	164.04	120.05	165.043	[M-H]-	Phenolic acids	1.52178e+06	1.60261e+06	1.56074e+06	3.56029e+06	3.33489e+06	3.75075e+06	2.31205e+06	2.38715e+06	1.90418e+06	C05653	ko00380,ko01100
2-Amino-3-methoxybenzoic acid	168.06	94.06	167.058	[M+H]+	Phenolic acids	5.41951e+06	5.49165e+06	4.47099e+06	3.28773e+06	3.44017e+06	5.51799e+06	2.10354e+06	2.65636e+06	2.31608e+06	C05831	ko00380
LysoPE 20:2(2n isomer)*	506.32	365.31	505.317	[M+H]+	Lipids	3793.04	2524.7	2109.47	95440.8	125921	82031.4	61733.4	55021	48681.7	-	-
Isomaltulose	341.11	89.02	342.116	[M-H]-	Others	2.61414e+06	1.6891e+06	880483	946347	904603	866828	873167	876332	1.06803e+06	C01742	-
5,6,7,3',4',5'-hexanmethoxyflavone	401.18	59.01	402.132	[M-H]-	Flavonoids	144556	123481	133524	9461.22	13670.9	12445.2	64290.1	60483.9	50784.9	-	-
Fraxidin-8-O-glucoside	385.12	223.06	384.106	[M+H]+	Lignans and Coumarins	136557	144197	184129	67505	34736.7	45005	57149.5	66313.8	72661.2	-	-
7-Hydroxy-4-chromone	163.04	107.05	162.032	[M+H]+	Others	6.28787e+06	7.58193e+06	1.10222e+07	2.36777e+06	2.28289e+06	2287505	5.12397e+06	4.39755e+06	4.06636e+06	-	-
Isoscopoletin (6-Hydroxy-7-Methoxycoumarin)	193.05	178.02	192.042	[M+H]+	Lignans and Coumarins	7.35323e+06	7.75609e+06	8.60923e+06	6.25719e+06	6.39376e+06	5.92899e+06	6.73491e+06	5.45822e+06	5.56865e+06	C18079	ko00999
2',4',6'-Trihydroxyacetophenone	167.04	123.05	168.042	[M-H]-	Phenolic acids	46967.8	55653.8	55654.7	120579	135737	88566	79271.9	96755.8	79028.8	C21895	-
N-trans-cinnamoylphydroxyphenylethylamine	268.13	131.05	267.126	[M+H]+	Alkaloids	1.25901e+07	9.84508e+06	1.05806e+07	1.91723e+06	2.05361e+06	1.52897e+06	7.60406e+06	6.1834e+06	6.25534e+06	-	-
L-Leucyl-L-Leucine	245.19	86.1	244.179	[M+H]+	Amino acids and derivatives	2.25594e+06	1.29819e+06	2.04771e+06	2.11298e+06	2.45756e+06	2.3965e+06	1.89801e+06	1.62875e+06	1.50443e+06	-	-
Solatriose	487.17	341.11	488.174	[M-H]-	Others	92615.7	125828	85697.1	72312.1	31520.6	54488.1	56451	47916.2	44942	-	-
N-Ethylglycine	104.07	58.07	103.063	[M+H]+	Amino acids and derivatives	5.36522e+06	5.50461e+06	5.24622e+06	6.12797e+06	6.4263e+06	7.17385e+06	5.85849e+06	6.06685e+06	4.81285e+06	-	-
L-Aspartyl-L-Phenylalanine	281.11	166.09	280.106	[M+H]+	Amino acids and derivatives	395933	397386	359991	924074	868834	920553	593609	516911	467873	-	-
Persicoside	477.14	315.09	478.147	[M-H]-	Flavonoids	858635	746896	854042	354416	484446	831688	442555	487419	561378	-	-
Haploperoside	501.16	193.05	500.153	[M+H]+	Lignans and Coumarins	996278	998395	835090	97360.4	125058	109579	429559	342179	420444	-	-
Quercetin-3-O-(2''-O-Rhamnosyl)rutinoside	757.22	303.05	756.211	[M+H]+	Flavonoids	120532	327505	88501.4	2300005	2012505	613336	423047	388804	331456	-	-
5,7,3',4',5'-Pentamethoxyflavanone	375.14	345.05	374.137	[M+H]+	Flavonoids	1.68665e+06	1.79566e+06	1.62061e+06	90056.5	73648.2	71382.7	655150	767325	837301	-	-
glyconone	274.14	202.09	273.137	[M+H]+	Alkaloids	3.09482e+06	2.56804e+06	3.17043e+06	337236	264212	414144	1.37384e+06	1.17409e+06	1.08506e+06	-	-
Apigenin-8-C-Glucoside (Vitexin)	431.1	311.05	432.106	[M-H]-	Flavonoids	2.88889e+06	3.25049e+06	2.04219e+06	5.10645e+06	4.44815e+06	4.05379e+06	3.26446e+06	3.11584e+06	3.90387e+06	C01460	ko00941,ko00944
Oleamide (9-Octadecenamide)	282.28	247.24	281.272	[M+H]+	Lipids	50579.6	16851.3	13394	23508.7	15930.7	7524.92	25056.4	19583.7	22703.4	C19670	-
Kaempferol-3-O-robinobioside(Biorobin)	593.15	285.04	594.159	[M-H]-	Flavonoids	617800	625904	612932	6.77905e+06	6.76784e+06	5.62138e+06	3.72859e+06	2.92371e+06	3.49116e+06	-	-
Rhamnazin 3-Glucosyl-Arabinofuranoside	623.16	315.05	624.169	[M-H]-	Flavonoids	187085	231558	206135	467147	369868	380314	235429	293638	293425	-	-
Androsin	327.11	165.05	328.116	[M-H]-	Phenolic acids	216332	192348	212081	148211	141193	185069	138026	175161	150033	-	-
Apigenin-6-C-(2''-glucuronyl)xyloside	579.13	283.06	578.127	[M+H]+	Flavonoids	544716	157505	499759	2.06859e+06	1.9219e+06	1.60906e+06	1.31436e+06	1.1302e+06	1.03401e+06	-	-
S-(5'-Adenosy)-L-homocysteine	385.13	250	384.122	[M+H]+	Amino acids and derivatives	193021	179392	188530	69494.6	27997.2	51910.8	84137	65792.2	74022.7	C00021	ko00270,ko01100,ko01230,ko01240
Isofraxidin	223.06	190.03	222.053	[M+H]+	Lignans and Coumarins	70005	14648.9	20679.4	197505	61307.1	97716.1	35676.1	29294.4	37227.1	C17480	-
3-Methyl-L-Histidine	170.09	124.09	169.085	[M+H]+	Amino acids and derivatives	57275	48985	59224	47556.3	62206.9	54429.4	47018	60203.4	53147.4	C01152	ko00340,ko01100
5,7-Dihydroxy-1(3H)-isobenzofuranone	165.02	121.03	166.027	[M-H]-	Phenolic acids	384336	448755	336035	112191	162653	123344	257945	262126	208258	-	-
Kaempferol-3-O-rutinoside-7-O-rhamnoside	741.22	287.06	740.216	[M+H]+	Flavonoids	866764	1670005	794726	2.65213e+06	2.73215e+06	2.75121e+06	1.57819e+06	1.87764e+06	2.02017e+06	-	-
1-O-Sinapoyl-β-D-glucose	385.11	223.06	386.121	[M-H]-	Phenolic acids	198956	204571	214136	367423	391567	230612	241091	253011	303239	C01175	ko00940,ko01110
5,6,7,5'-tetramethoxy-3',4'-methylenedioxyflavonoid	385.08	85.03	386.1	[M-H]-	Flavonoids	2.70685e+06	2.3794e+06	2.1717e+06	648749	744543	799110	2.9799e+06	3.75287e+06	3.12222e+06	-	-
Hydroxyferulic acid glucoside	371.1	209.05	372.106	[M-H]-	Phenolic acids	547087	596374	636821	231814	373869	321396	507533	566099	439789	-	-
Chrysoeriol-6-C-rhamnoside-7-O-rhamnoside	593.18	447.13	592.179	[M+H]+	Flavonoids	58707.7	62816	76765.2	688729	552445	755611	234872	193855	187272	-	-
Methylenesuccinic acid	129.02	85.03	130.027	[M-H]-	Organic acids	87811.3	64660.2	56986.4	265411	395117	333923	189582	242453	208206	C00490	ko00660,ko01100
Sweroside	359.13	179.07	358.126	[M+H]+	Terpenoids	286758	338867	323861	284869	279800	307073	226923	251318	290856	C17071	-
L-Valine	118.09	72.08	117.079	[M+H]+	Amino acids and derivatives	2.11696e+07	2.10781e+07	3.05079e+07	2.71045e+07	2.89432e+07	2.21212e+07	2.23827e+07	2.86879e+07	2.467e+07	C00183	ko00280,ko00290,ko00460,ko00770,ko00966,ko00970,ko01100,ko01110,ko01210,ko01230,ko01240,ko02010
1-O-Vanilloyl-D-Glucose	329.11	167.03	330.095	[M-H]-	Phenolic acids	247025	291775	333889	1.40426e+06	1.00264e+06	889187	815461	632416	723016	C20470	-
L-Homocitrulline	190.12	84.08	189.111	[M+H]+	Amino acids and derivatives	93980.8	83972.8	104917	376641	382849	379169	225100	195386	252152	C02427	-
Chrysoeriol-6,8-di-C-glucoside-7-O-glucoside*	787.23	625.1	786.222	[M+H]+	Flavonoids	624938	642510	535122	440024	684035	497550	661385	513405	617390	-	-
3-Hydroxy-4-methoxybenzoic acid; Isovanillic Acid	169.05	65.04	168.042	[M+H]+	Phenolic acids	1.36417e+06	1.50308e+06	1.39518e+06	1.84318e+06	2.35086e+06	2.04756e+06	1.53851e+06	1.70259e+06	1.97692e+06	-	-
p-Coumaryl alcohol	149.06	131.05	150.068	[M-H]-	Phenolic acids	83559.9	86595.2	75999.2	35379.2	30628.2	32195.9	47523.2	42244.2	54456.9	C02646	ko00940,ko01100,ko01110
Scopoletin (7-Hydroxy-6-methoxycoumarin)	193.05	133.03	192.042	[M+H]+	Lignans and Coumarins	1.13055e+07	1.42707e+07	1.33004e+07	1.18561e+07	1.19915e+07	1.09267e+07	1.15519e+07	8.94317e+06	1.0205e+07	C01752	ko00999,ko01110
Ptelefoliarine	274.14	202.09	273.137	[M+H]+	Alkaloids	2.84702e+06	2.96672e+06	3.09286e+06	333677	255727	388724	1.59471e+06	1.24917e+06	1.34514e+06	-	-
Meranzin	261.11	189.06	260.105	[M+H]+	Lignans and Coumarins	1.13855e+07	1.03625e+07	11670481	415175	399200	435807	9.13392e+06	7.76123e+06	7.13125e+06	-	-
4-Oxo-9Z,11Z,13E,15E-Octadecatetraenoic Acid	291.2	191.11	290.188	[M+H]+	Lipids	1.73517e+06	1.99703e+06	1.5802e+06	17260.3	13025.4	20501.7	1.08901e+06	843796	951142	-	-
4-Hydroxy-L-glutamic acid	162.04	144.03	163.048	[M-H]-	Amino acids and derivatives	72009.6	68340.7	67424.2	95859.1	142182	124294	73423	91272.7	93516.9	C03079	-
12,13-Dehydrogeranylgeraniol	289.25	107.08	288.245	[M+H]+	Terpenoids	252743	237195	310469	5984.26	6369.76	19207.7	100715	91266.1	117343	-	-
Murpaniculol	277.11	189.05	276.1	[M+H]+	Lignans and Coumarins	3.50892e+06	3.93366e+06	3.95752e+06	43718.7	31831.7	61258.2	2.73524e+06	2.24415e+06	2.16862e+06	-	-
Gluconic acid	195.05	75.01	196.058	[M-H]-	Others	7.03398e+06	8.72449e+06	5.22352e+06	4.42106e+06	6.23815e+06	6.82608e+06	7.42949e+06	7.92327e+06	6.1289e+06	C00257	ko00030,ko01100,ko01110,ko01200
4-Coumaroylcholine	250.14	147.04	250.144	[M]+	Alkaloids	16517.2	58123.2	70722.6	170287	116443	165425	129764	102928	130425	-	-
Syringetin-3-O-rutinoside-7-O-glucoside	817.24	509.13	816.232	[M+H]+	Flavonoids	1.11032e+06	1.48745e+06	1.10979e+06	1.7388e+06	1.90929e+06	1.66077e+06	1.35641e+06	1.33595e+06	1.67355e+06	-	-
Hypoxanthine	137.05	119.04	136.038	[M+H]+	Nucleotides and derivatives	188981	158158	178526	160037	180784	171280	133722	149590	173113	C00262	ko00230,ko01100,ko01232
Urs-12(13)-en-3-one-28-oic acid	453.34	453.34	454.345	[M-H]-	Terpenoids	196005	195373	167813	279691	241587	233121	181081	235383	206878	-	-
Chrysoeriol-7,4'-di-O-glucoside	625.18	301.6	624.169	[M+H]+	Flavonoids	54631.9	55836.6	41444	50729.9	31219.9	34163.9	43901.4	46827.9	36097.4	-	-
N-(4-O-(Glucosyl)-E-feruloyl)-tyramine	474.18	312.12	475.184	[M-H]-	Alkaloids	48153.2	55643.2	77043.2	30498.2	21390.9	29428.2	33708.2	43873.2	38566.6	-	-
5,7,5'-Trimethoxy-3',4'-methylenedioxyflavonoid	355.07	85.03	356.09	[M-H]-	Flavonoids	1.93267e+07	3.83245e+07	3.48274e+07	2.06944e+07	1.51044e+07	2.74667e+07	2.99056e+07	2.51163e+07	2.32635e+07	-	-
p-Coumaroylagmatine	277.17	147.04	276.159	[M+H]+	Alkaloids	241264	252251	252528	139668	168128	96336.5	219905	177600	175400	C04498	ko00330,ko01100
3'-O-Methyltricetin-5-O-glucoside	479.12	317.1	478.111	[M+H]+	Flavonoids	5.0277e+06	9.40859e+06	9.74963e+06	407322	540349	242032	3.94139e+06	3.979e+06	3.12206e+06	-	-
Palmitoleic Acid	253.22	235.21	254.225	[M-H]-	Lipids	194193	180717	278950	383079	354263	253893	334786	278360	362275	C08362	ko00061,ko01100
2-Amino-4,5-dihydro-1H-imidazole-4-acetic acid	144.08	84.06	143.07	[M+H]+	Alkaloids	781220	1.14446e+06	759838	1.05908e+06	1.59405e+06	1.74989e+06	965460	1.21455e+06	982130	-	-
Robinson-7-O-Neohesperidin	593.19	285.08	592.179	[M+H]+	Flavonoids	1.036e+06	851760	1.03798e+06	8.41617e+06	9.43106e+06	1.0438e+07	2.72994e+06	2.10584e+06	2.33331e+06	-	-
Obacunoic acid	473.22	427.21	472.21	[M+H]+	Terpenoids	322530	300319	450569	232157	218595	271394	314731	245184	261524	-	-
N-Acetylputrescine	131.12	114.09	130.111	[M+H]+	Alkaloids	477821	556862	417703	242927	271897	326643	336337	414710	327231	C02714	ko00330,ko01100
1-O-Feruloylquinic acid	369.12	177.05	368.111	[M+H]+	Phenolic acids	6.02677e+06	6.05098e+06	12834460	2.79103e+06	2.32891e+06	2.63877e+06	3.44949e+06	2.75257e+06	3.55309e+06	-	-
13-methylmyristic acid	241.22	241.21	242.225	[M-H]-	Lipids	2.67664e+06	3.15725e+06	2.66866e+06	4.48604e+06	5.04949e+06	4.41171e+06	3.97317e+06	4.83285e+06	3.77542e+06	-	-
L-Methionine	150.06	61.01	149.051	[M+H]+	Amino acids and derivatives	89423.1	99199.8	116838	10812	11527.7	3117.45	44714.8	47779.3	57564.3	C00073	ko00270,ko00470,ko00966,ko00970,ko00999,ko01100,ko01110,ko01210,ko01230,ko01240
3ξ-(1ξ-Hydroxyethyl)-7-hydroxy-1-isobenzofuranone	195.07	117.03	194.058	[M+H]+	Others	287244	252578	243902	140821	178905	183539	233847	217874	178881	-	-
Nodakenin	409.15	247.1	408.142	[M+H]+	Lignans and Coumarins	5058825	2.67128e+06	1.79284e+06	1.23371e+07	1.34858e+07	1.45343e+07	5.68958e+06	7.2899e+06	5.98599e+06	C09279	-
Skimmin (7-Hydroxycoumarin-7-O-glucoside)	325.09	163.04	324.084	[M+H]+	Lignans and Coumarins	1.44782e+07	1.50125e+07	1.24154e+07	4.25601e+06	6.27811e+06	5.30311e+06	8.21614e+06	1.01159e+07	7.95026e+06	-	-
3,4',5,6,7-Pentamethoxyflavone	373.13	211.02	372.121	[M+H]+	Flavonoids	128656	93936.4	58642.2	2979.23	7483.07	10151.4	50452.7	47563.9	38648.6	-	-
Isorhamnetin-3-O-rutinoside-7-O-(2''-O-glucosyl)glucuronate	963.27	801.23	962.254	[M+H]+	Flavonoids	51576.7	86309.2	101658	6343.84	7109.89	27506.3	54734.2	51877.1	66655.7	-	-
Diosmetin-7-O-rutinoside (Diosmin)	609.18	301.07	608.174	[M+H]+	Flavonoids	639404	786250	697863	1040005	1277505	514232	712673	615071	543109	C10039	-
Methylmalonic acid	117.02	73.03	118.027	[M-H]-	Organic acids	8.13438e+06	4.5842e+06	7.63063e+06	1.16862e+07	1.61043e+07	1.70249e+07	9.83033e+06	1.28501e+07	1.22066e+07	C02170	ko00240,ko00280,ko00640,ko01100
Apigenin-8-C-glucoside-7-O-Sophoroside	757.22	595.2	756.211	[M+H]+	Flavonoids	329515	303516	222656	1.17604e+06	1.12106e+06	1.02612e+06	884187	802747	670754	-	-
NG,NG-Dimethyl-L-arginine*	203.15	70.07	202.143	[M+H]+	Amino acids and derivatives	593576	606968	650810	1.09988e+06	1.33331e+06	1.09449e+06	845784	1.10825e+06	944620	C03626	-
Phloroglucinol; 1,3,5-Benzenetriol	127.04	81.03	126.032	[M+H]+	Phenolic acids	1.03138e+06	800636	972914	624311	616496	391907	518230	412245	537002	C02183	-
Bufotenine O-Glucoside	367.19	160.08	366.179	[M+H]+	Alkaloids	1.35398e+06	1.33307e+06	1.3395e+06	8.70535e+06	9.96673e+06	9.23267e+06	4.06937e+06	4.30087e+06	5.24894e+06	-	-
Ribosyladenosine	400.15	136.06	399.139	[M+H]+	Nucleotides and derivatives	339729	235644	276803	259084	222829	307313	200833	258307	210077	-	-
Didymin (Isosakuranetin-7-O-rutinoside)	593.19	285.08	594.195	[M-H]-	Flavonoids	1.02398e+07	8.29394e+06	1.09399e+07	2.69012e+07	2.56702e+07	2.77417e+07	1.56042e+07	2.02952e+07	1.97709e+07	-	-
2-Deoxyribose-1-phosphate	213.02	96.97	214.024	[M-H]-	Nucleotides and derivatives	83820	167833	87336.7	416322	379039	231154	364258	277756	308088	C00672	ko00030,ko00240,ko01100
Pinocembrin-7-O-neohesperidoside*	563.18	255.07	564.184	[M-H]-	Flavonoids	431187	468266	501776	1.21035e+06	1.16125e+06	1.03281e+06	730444	807389	957265	C09828	-
Eriodictyol-3'-O-glucoside	449.11	287.06	450.116	[M-H]-	Flavonoids	2.60211e+06	2.91595e+06	3.35319e+06	638143	1.09562e+06	865612	1.20615e+06	1.45342e+06	1.59511e+06	-	-
L-Cyclopentylglycine	144.1	98.09	143.095	[M+H]+	Amino acids and derivatives	2.54861e+07	2.95678e+07	2.59277e+07	4.23327e+07	4.33254e+07	4.70732e+07	3.53645e+07	4.68968e+07	4.12815e+07	-	-
murrayone	259.1	189.05	258.089	[M+H]+	Lignans and Coumarins	541935	746599	598613	311451	342756	343376	321420	279089	242375	-	-
O-Phosphocholine	184.07	125	184.073	[M]+	Alkaloids	200789	205685	216815	204285	244260	272553	172436	220446	224810	C00588	ko00564,ko01100
sphondin	217.05	202.03	216.042	[M+H]+	Lignans and Coumarins	4.62692e+06	5.15849e+06	3.76075e+06	7.09568e+06	7.4652e+06	6.11617e+06	6.11234e+06	5.32908e+06	4.60248e+06	C18081	-
Crepidiaside A	423.16	243.1	422.158	[M+H]+	Terpenoids	471170	482481	318994	352046	385565	320183	306467	391657	400191	-	-
2,6-Dimethoxybenzaldehyde	165.06	119.05	166.063	[M-H]-	Phenolic acids	306025	306810	331577	470309	431205	591966	320938	352718	422805	-	-
Quercetin-3-O-neohesperidoside*	611.16	303.05	610.153	[M+H]+	Flavonoids	7.66946e+06	7.34858e+06	7.24119e+06	1.50393e+07	1.43028e+07	1.16204e+07	1.30424e+07	1.00705e+07	1.05209e+07	-	-
Isovitexin-2''-O-rhamnoside	579.17	313.07	578.164	[M+H]+	Flavonoids	656897	594788	690040	2.15673e+06	2.15744e+06	2.2932e+06	1.7531e+06	1.3393e+06	1.43757e+06	-	-
Catechin gallate	443.1	139.04	442.09	[M+H]+	Flavonoids	67348.3	69431.5	91423.6	184446	160495	192735	129550	132638	101128	-	-
3',4',7-Trihydroxyflavone	271.06	243.06	270.053	[M+H]+	Flavonoids	12531.6	18782.6	13656.2	41067.2	20262.9	35956.7	30521.3	23245	25092.1	-	-
Chrysoeriol-5-O-glucoside	461.11	299.1	462.116	[M-H]-	Flavonoids	1.17921e+06	1.15857e+06	1.33504e+06	94018	77924.7	130866	851864	1.11446e+06	909715	-	-
Indole	118.07	91.05	117.058	[M+H]+	Alkaloids	375395	478271	445327	675548	710455	673819	450541	551404	601595	C00463	ko00380,ko00400,ko01100,ko01110
Sexangularetin-3-O-glucoside-7-O-rhamnoside	625.18	317.07	624.169	[M+H]+	Flavonoids	9	9	9	1.91461e+07	2.09697e+07	1.95208e+07	2.12461e+07	2.04298e+07	1.60854e+07	-	-
Hyp-Ser	219.1	86.06	218.09	[M+H]+	Amino acids and derivatives	66709	121612	94625.4	93156.8	144466	103401	115150	153568	142703	-	-
5,6,3',4'-Tetrahydroxy-3,7-dimethoxyflavone-6-O-glucoside	509.13	347.08	508.122	[M+H]+	Flavonoids	2.50862e+06	2.96133e+06	2.58424e+06	572505	595005	565005	1.52993e+06	1.53568e+06	1.95209e+06	-	-
Benzyl acetate	149.06	107.05	150.068	[M-H]-	Organic acids	186130	178487	193860	123976	118222	107513	105416	140066	132711	C15513	-
LysoPE 18:1*	480.31	339.29	479.301	[M+H]+	Lipids	50930.1	35090	61720.5	477616	673023	542990	230782	298073	302313	-	-
LysoPC 16:2*	492.31	184.07	491.301	[M+H]+	Lipids	4903.19	3305.94	3927.09	94388.9	138318	91626.8	35628.4	43755.3	33388.7	-	-
Cis-Aconitic acid	173.01	129.02	174.016	[M-H]-	Organic acids	700283	619708	675205	2.29084e+06	3.23574e+06	2.45761e+06	1.47972e+06	1.59556e+06	1.94632e+06	C00417	ko00020,ko00630,ko00660,ko01100,ko01110,ko01210
Dihydroferuloylputrescine	267.17	179.07	266.163	[M+H]+	Alkaloids	9.15096e+06	1.04813e+07	9.42866e+06	3.84602e+06	3.93587e+06	3.1822e+06	6.47218e+06	5.13543e+06	5.02456e+06	-	-
Isovitexin-7-O-glucoside(Saponarin)	595.16	313.07	594.159	[M+H]+	Flavonoids	527079	404274	410596	700485	714073	669299	604430	451059	526243	C08064	-
Crotonoside; 2-Hydroxyadenosine	284.1	152.06	283.092	[M+H]+	Nucleotides and derivatives	2.23762e+06	2.7298e+06	2.30755e+06	2.35905e+06	1.87162e+06	1.43664e+06	3.16305e+06	2.36596e+06	2.94151e+06	C08432	-
2,4,2',4'-tetrahydroxy-3'-prenylchalcone	341.14	137.06	340.131	[M+H]+	Flavonoids	106493	100718	142969	80153.1	83269.5	56238.7	72131.2	65395.9	86790.6	-	-
Quercetin-3-O-glucoside-7-O-rhamnoside*	611.16	303.05	610.153	[M+H]+	Flavonoids	6.76106e+06	7.92401e+06	7.94674e+06	1.65594e+07	1.39048e+07	1.30418e+07	1.37316e+07	1.11816e+07	1.04414e+07	-	-
Demethylnobiletin 5-O-Glucoside	551.18	389.12	550.169	[M+H]+	Flavonoids	2.80836e+07	3.17857e+07	3.12617e+07	1.03557e+07	1.00473e+07	8.44465e+06	2.35395e+07	1.76435e+07	1.98119e+07	-	-
N-Acetyl-D-glucosamine	222.1	138.05	221.09	[M+H]+	Others	159522	160847	164331	41202.5	36383.4	34860.8	71292.1	95843.4	86969.8	C00140	ko00520,ko01100,ko01250,ko02010
8-Epiloganic acid	375.13	195.07	376.137	[M-H]-	Terpenoids	321584	520405	606740	390066	282178	273684	402032	298690	355447	-	-
Hinokinin	355.12	135.04	354.11	[M+H]+	Lignans and Coumarins	509866	573271	618083	794010	879474	1.16765e+06	740125	644142	863914	-	-
Methylhesperidin	623.2	315.08	624.205	[M-H]-	Flavonoids	233859	149793	207746	432204	443504	331914	273535	360787	353906	C17393	-
Cis-L-3-hydroxyproline	132.07	86.06	131.058	[M+H]+	Amino acids and derivatives	6.37561e+06	6.77099e+06	7.72383e+06	1.18783e+07	4.41266e+06	1.36171e+07	8.51788e+06	1.1451e+07	9.89567e+06	-	-
Isovanillin	153.05	65.04	152.047	[M+H]+	Phenolic acids	1.19659e+06	1.02803e+06	1.42596e+06	678626	551655	586486	632529	833433	820670	-	-
Azelaic acid	187.1	125.1	188.105	[M-H]-	Organic acids	6.82009e+06	6.79483e+06	6.93545e+06	1.02925e+07	1.04336e+07	9.37235e+06	7.11952e+06	9.57638e+06	8.25255e+06	C08261	-
Kaempferol-3-O-(6''-malonyl)galactoside*	535.11	287.05	534.101	[M+H]+	Flavonoids	79073.9	56876.3	76411.2	352145	299026	256405	185501	138149	157799	-	-
Avicularin(Quercetin-3-O-α-L-arabinofuranoside)*	435.09	303.05	434.085	[M+H]+	Flavonoids	246519	310540	276929	225168	209151	183283	209713	188289	251885	-	-
Methyl dioxindole-3-acetate	222.08	130.06	221.069	[M+H]+	Alkaloids	169037	187085	164123	30713.5	43732.7	42827.5	92789.8	98938.5	122430	-	-
3,5-Dicaffeoylquinic acid	515.12	353.09	516.127	[M-H]-	Phenolic acids	239613	54533	178378	81123	100210	112847	123808	163856	133022	-	-
L-Homoserine	120.07	74.06	119.058	[M+H]+	Amino acids and derivatives	307316	170249	1.92587e+06	3.03199e+06	2.7286e+06	1.80839e+06	3.01657e+06	2.42265e+06	3.27244e+06	C00263	ko00260,ko00270,ko00300,ko00920,ko01100,ko01110,ko01230
Hesperidin methylchalcone	625.22	317.1	624.205	[M+H]+	Flavonoids	865560	827988	1.10134e+06	1.68443e+06	1.51379e+06	2.0088e+06	1.38342e+06	1.02365e+06	1.27677e+06	-	-
3-Phospho-D-glyceric acid	184.98	78.96	185.993	[M-H]-	Others	76367.9	49379.4	47096.2	42493.1	58623.8	85630.6	54070.8	73011.6	62244.3	C00197	ko00010,ko00030,ko00260,ko00270,ko00561,ko00630,ko00710,ko01100,ko01110,ko01200,ko01230,ko01240
Clausindine	255.1	199.04	254.094	[M+H]+	Lignans and Coumarins	558649	403664	445855	22557.7	21147	25436.3	120576	89206.4	103201	-	-
Echinacoside	785.25	623.22	786.258	[M-H]-	Phenolic acids	607033	609753	511568	396676	468224	447187	505189	570165	420356	C10450	-
4-Guanidinobutyric acid	146.09	87.04	145.085	[M+H]+	Organic acids	895589	1.13958e+06	772264	691023	668551	913877	521831	706786	611837	C01035	ko00330,ko01100
Phenylpyruvic acid	163.04	91.06	164.047	[M-H]-	Organic acids	189469	146052	142877	345772	361663	384544	226827	295385	232406	C00166	ko00360,ko00400,ko00470,ko00960,ko01100,ko01110,ko01210,ko01230
N-Feruloyl-3-methoxytyramine	344.15	206.06	343.142	[M+H]+	Alkaloids	193923	148059	179439	80458	103682	118854	116325	131162	156760	-	-
D-Erythrose-4-phosphate	199	78.96	200.009	[M-H]-	Others	414821	961387	541442	557220	662073	575192	506091	455162	372352	C00279	ko00030,ko00400,ko00710,ko00750,ko01100,ko01110,ko01200,ko01230,ko01240
Bis(2-ethylhexyl)phthalate*	391.28	149.02	390.277	[M+H]+	Phenolic acids	7.78983e+07	7.23901e+07	8.05759e+07	5.37318e+07	1.81785e+06	1.5395e+06	431781	586945	510984	C03690	-
D-Maltose	341.11	89.02	342.116	[M-H]-	Others	1.32846e+06	1.23789e+06	1.72232e+06	1.25644e+06	1.0799e+06	1.815e+06	892998	1.21116e+06	1.03583e+06	C01971	-
5,2'-Dihydroxy-7,8-dimethoxyflavone glycoside*	477.14	315.08	476.132	[M+H]+	Flavonoids	458562	598699	429477	162855	170843	169134	301295	281614	374112	-	-
Eriodictyol-7-O-(6''-malonyl)glucoside	537.12	289	536.117	[M+H]+	Flavonoids	37033.7	57605.8	51111.2	53301.7	28805.8	38519.5	34733	34710	44820.6	-	-
Isorhamnetin-3-O-galactoide-7-O-rhamnoside*	625.18	317.07	624.169	[M+H]+	Flavonoids	1.63517e+06	1.60129e+06	1.6079e+06	2.21497e+06	1.7699e+06	2.04351e+06	1.90878e+06	1.43698e+06	1.52942e+06	-	-
3,5-Diacetyltambulin	429.12	385.09	428.111	[M+H]+	Flavonoids	27073.4	23209.2	27751.4	51912.2	59352.7	46823	33099.9	44598.4	42780.8	-	-
Austroside A	403.2	205.12	402.189	[M+H]+	Others	161290	144280	151857	49233.1	58235.9	48738	74065.1	70570.1	93250.1	-	-
Quercetin-3-O-rutinoside (Rutin)*	611.16	303.05	610.153	[M+H]+	Flavonoids	9.50719e+06	7.62007e+06	7.24879e+06	1.41024e+07	1.3304e+07	1.04377e+07	1.35701e+07	9.99106e+06	1.1458e+07	C05625	ko00944,ko01100,ko01110
7-Deoxyloganic acid	359.13	197.08	360.142	[M-H]-	Terpenoids	37403.9	28273.1	27499.9	43164.7	44168.4	32631.6	31633	43171.9	39228.5	C11636	ko00902,ko01110
Citric Acid	191.02	111.01	192.027	[M-H]-	Organic acids	3.3131e+06	3.66169e+06	4.27865e+06	3.02362e+07	2.59894e+07	3.87127e+07	2.57177e+07	2.37011e+07	3.17302e+07	C00158	ko00020,ko00250,ko00630,ko01100,ko01110,ko01200,ko01210,ko01230,ko01240
Apigenin-7-O-glucoside-4'-O-rutinoside	739.21	269.2	740.216	[M-H]-	Flavonoids	54178	31643.6	32428.7	59761.4	54417.2	45672.2	36286	48587.2	47615.6	-	-
Benzoic acid	123.04	79.05	122.037	[M+H]+	Phenolic acids	1.1317e+06	1.1832e+06	1.39943e+06	1.5176e+06	1.14875e+06	1.36718e+06	1.11993e+06	1.29839e+06	1.52994e+06	C00180	ko00996,ko01100,ko01110
18-Demethylparaensidimerin C	469.22	307.13	468.205	[M+H]+	Alkaloids	1692505	1.61469e+06	1.09164e+06	759271	756392	733228	1045005	777172	1.02054e+06	-	-
Tricin-7-O-neohesperidoside	639.19	331.08	638.185	[M+H]+	Flavonoids	1.25886e+07	1.44224e+07	1.16272e+07	9.43522e+06	1.06927e+07	1.02141e+07	1.39557e+07	1.30468e+07	1.02181e+07	-	-
N-Acetyl-L-glutamic acid	188.06	128.04	189.064	[M-H]-	Amino acids and derivatives	83615.3	207769	117277	105565	91323.5	105951	125324	107766	91344.6	C00624	ko00220,ko01100,ko01110,ko01210,ko01230
Quercetin3-O-galactoside	465.1	303.05	464.096	[M+H]+	Flavonoids	8.62957e+06	8.35745e+06	9.04304e+06	1.47577e+07	14019165	11324568	1.12894e+07	8.58619e+06	8.79155e+06	-	-
Dihydroisopelletierine	144.14	84.08	143.131	[M+H]+	Alkaloids	1.51506e+07	2.03508e+07	1.76239e+07	3.34063e+07	3.58467e+07	3.85304e+07	2.43247e+07	33385254	2.8496e+07	-	-
Quercetin-3-O-sophoroside-7-O-rhamnoside	773.21	303.05	772.206	[M+H]+	Flavonoids	2.01212e+06	1.66406e+06	1.70963e+06	3.9893e+06	3.13444e+06	3.16376e+06	2.08971e+06	2.87647e+06	2.49028e+06	-	-
3-Hydroxy-1,4-dimethoxy-10-methylacridin-9-one	286.11	271.08	285.1	[M+H]+	Alkaloids	1.46936e+06	1.07032e+06	1.26798e+06	14730.7	19946.7	24041.6	755429	628847	552977	-	-
3-Indoleacetonitrile	157.08	130.07	156.069	[M+H]+	Alkaloids	66964.1	72166.6	67988.6	157654	154930	139753	88386.1	108571	121864	C02938	ko00380,ko01100
4-MethoxycinnaMaldehyde	163.08	91.05	162.068	[M+H]+	Phenolic acids	5.3833e+06	4.89405e+06	4.71094e+06	1.03164e+06	783985	931998	3.46277e+06	4.36367e+06	3.25927e+06	C10475	-
Suberic Acid	173.08	111.08	174.089	[M-H]-	Organic acids	131651	179629	130646	186320	175768	174249	145429	149629	110402	C08278	-
Isochlorogenic acid C*	515.12	353.09	516.127	[M-H]-	Phenolic acids	115158	150969	145947	53684.5	77724	78823.5	68243.1	92281.8	90601.9	-	-
3'-O-Methyltricetin-7-O-glucoside	479.12	317.07	478.111	[M+H]+	Flavonoids	1.5553e+07	5748505	1.44061e+07	7.62392e+06	8.92685e+06	6.96301e+06	1.26515e+07	1.0564e+07	9.20257e+06	-	-
3-Hydroxy-3',4',5,5',7-Pentamethoxyflavone*	389.12	359.08	388.116	[M+H]+	Flavonoids	6.58994e+06	4.64463e+06	3.7631e+06	206588	168670	290268	3.71793e+06	3.60613e+06	2.73278e+06	-	-
Margaritene	593.19	447.13	592.179	[M+H]+	Flavonoids	350448	323495	376390	656805	532313	553519	497861	457778	360445	-	-
3-Hydroxyanthranilic acid	154.05	136.04	153.043	[M+H]+	Alkaloids	95966.6	102157	157587	194205	150558	196703	258826	226164	186605	C00632	ko00380,ko01100,ko01240
(2E,6E,8E)-N-(2-hydroxy-2-methylpropyl)-10-oxo-2,6,8-decatrienamide	220.17	91.05	219.162	[M+H]+	Alkaloids	71624.6	100620	71290.9	4074.9	22048.4	12867.5	42925.6	43699.9	32232.8	-	-
Marmesin O-[6''-(3-Hydroxy-3-Methylglutaryl)Glucoside]	553.19	247.1	552.184	[M+H]+	Lignans and Coumarins	4.45751e+06	5.20333e+06	4.53129e+06	128430	112544	93834.7	3.49326e+06	2.79422e+06	2.57852e+06	-	-
Mearnsetin	333.06	153.02	332.053	[M+H]+	Flavonoids	30005	21211.9	21211.9	16400.4	24959.3	50001.8	37843.5	37619.4	28060.4	-	-
Diethanolamine	106.09	88.08	105.079	[M+H]+	Alkaloids	168060	138908	185563	153683	144739	40745	230136	165814	205442	C06772	ko00564
Sinapoylcaffeoyltartaric acid	517.1	223.06	518.106	[M-H]-	Phenolic acids	22267.5	14749.5	8587.36	99096.4	69028.9	114258	42885.2	40992.4	31271.4	-	-
N-(gamma-L-glutamyl)tyramine O-glucoside	429.19	267.14	428.18	[M+H]+	Alkaloids	686729	887743	659589	384805	1.42349e+06	397223	614175	453864	487641	-	-
Sieboldin	451.12	289.07	452.132	[M-H]-	Flavonoids	22796.1	21641.7	27205.1	110251	109287	93752.4	62160.9	44828.9	57327	-	-
Lariciresinol-4'-O-glucoside	521.2	359.15	522.21	[M-H]-	Lignans and Coumarins	1.26432e+06	1.18657e+06	1.26623e+06	385255	431755	428545	972867	700735	827120	-	-
Limocitrol 3-Glucoside	539.14	377.09	538.132	[M+H]+	Flavonoids	1.21382e+06	950646	891374	65005	123749	119923	833459	628195	642389	-	-
Hesperetin-7-O-rutinoside (Hesperidin)*	611.2	303.09	610.19	[M+H]+	Flavonoids	1.41191e+06	464226	1.48538e+06	2.46571e+06	2.15507e+06	2355005	2485005	1.9063e+06	1.87916e+06	C09755	-
Pinocembrin (Dihydrochrysin)	255.07	151	256.074	[M-H]-	Flavonoids	31699.8	21238.2	27713.7	38967.4	37131.6	37366.9	38382.1	27948.8	31230.6	C09827	ko00941
Tricetin (5,7,3',4',5'-Pentahydroxyflavone)	301.04	151	302.043	[M-H]-	Flavonoids	63741.5	58904.8	87667	273641	282294	259386	174123	147653	205927	C10192	ko00941
Thr-Tyr	283.13	136.08	282.122	[M+H]+	Amino acids and derivatives	48433.2	86099.9	29195.2	114141	49154.8	54963.1	53474.6	43046.7	38762.3	-	-
Kaempferol-3-O-(2''-O-acetyl)glucuronide	503.08	459.1	504.09	[M-H]-	Flavonoids	1.80597e+06	1.53876e+06	1.82673e+06	16554.4	28036.9	29518.7	598217	683294	833880	-	-
2,3-Dihydroxy-3-Methylbutanoic Acid	133.05	71.01	134.058	[M-H]-	Organic acids	1.15639e+06	1.59479e+06	1.97624e+06	7.55488e+06	8.28333e+06	1.24599e+07	4.63266e+06	6.52421e+06	5.94884e+06	C04039	-
Acacetin-7-O-rutinoside (Linarin)	593.19	285.08	592.179	[M+H]+	Flavonoids	1.03567e+06	791287	1.05197e+06	7.15798e+06	8.6203e+06	9.12878e+06	2.25839e+06	1.82991e+06	1.61702e+06	-	-
N-(4-oxopentyl)-acetamide	144.1	84.08	143.095	[M+H]+	Alkaloids	765507	820416	663762	1.40633e+06	1.48684e+06	954304	1.20217e+06	1.01125e+06	850932	-	-
Quercetin-3-O-robinobioside	609.15	300.03	610.153	[M-H]-	Flavonoids	3.90715e+06	3.21669e+06	3.70196e+06	6.24381e+06	5.59293e+06	6.19593e+06	5.43194e+06	4.74647e+06	6.65706e+06	-	-
Limocitrin-3-O-(hydroxy-methylglutarate)glucoside-glucoside	815.23	347.08	814.216	[M+H]+	Flavonoids	1.534e+07	1.11934e+07	1.10455e+07	5228945	4711410	5632870	8.76676e+06	6.89778e+06	6.34806e+06	-	-
Shikimic acid	173.05	93.03	174.053	[M-H]-	Organic acids	435510	367248	328497	313102	231621	153853	188470	261352	257539	C00493	ko00400,ko00996,ko00999,ko01100,ko01110,ko01230,ko01240
Tricetin-5-O-(6''-malonyl)glucoside	551.1	303.05	550.096	[M+H]+	Flavonoids	465965	493147	490203	1.06477e+06	2.00483e+06	1.53088e+06	913647	665558	707488	-	-
3,4-Dihydro-4-(4'-hydroxyphenyl)-5,7-dihydroxycoumarin glucoside	435.13	273.08	434.121	[M+H]+	Lignans and Coumarins	545777	449124	679123	1.93958e+06	507193	1.46244e+06	792710	661782	941443	-	-
Murraol	261.11	201.09	260.105	[M+H]+	Lignans and Coumarins	27700605	27289510	24838840	632505	310012	817505	15469430	14647960	10963830	-	-
Neoeriocitrin	595.17	459.11	596.174	[M-H]-	Flavonoids	4.09788e+06	4.85359e+06	4.21348e+06	4.98637e+06	5.23241e+06	4.12098e+06	5.89421e+06	5.93649e+06	4.28191e+06	C09805	-
Feruloylmalic acid	309.06	193.05	310.069	[M-H]-	Phenolic acids	2.11318e+06	2.07906e+06	2.05306e+06	5.16958e+06	5.37711e+06	5.36819e+06	2.54568e+06	3.63882e+06	3.17003e+06	-	-
Apigenin-7-O-rutinoside (Isorhoifolin)*	579.17	271.04	578.164	[M+H]+	Flavonoids	623662	623936	622734	991124	846124	1685005	739580	792505	558609	-	-
Vitexin-2''-O-xyloside	565.16	433.11	564.148	[M+H]+	Flavonoids	276214	399895	370053	810931	832612	891302	706223	536311	519265	-	-
Citrusal	261.11	189.05	260.105	[M+H]+	Lignans and Coumarins	3.64374e+07	3.63417e+07	3.51229e+07	1.67025e+06	4614920	3646090	2.8481e+07	3.68291e+07	4.08548e+07	-	-
Suberenol	261.11	189.05	260.105	[M+H]+	Lignans and Coumarins	3.64374e+07	3.63417e+07	3.51229e+07	1.67025e+06	4614920	3646090	2.8481e+07	3.68291e+07	4.08548e+07	-	-
3-Hydroxycinnamic Acid	163.04	119.05	164.047	[M-H]-	Phenolic acids	171734	221487	167200	4.75316e+06	6.68216e+06	5.75134e+06	2.28497e+06	2.99004e+06	2.17233e+06	C12621	ko00360,ko01100
Lactobiose	341.11	89.02	342.116	[M-H]-	Others	2.07427e+06	2.25115e+06	1.69583e+06	1.46173e+06	1.30462e+06	1.76237e+06	1.6915e+06	1.95057e+06	2.40666e+06	C00243	ko00052,ko01100,ko02010
Quercetin-3-O-glucoside (Isoquercitrin)	465.1	303.05	464.096	[M+H]+	Flavonoids	2.40681e+07	3.78785e+07	4.07672e+07	6.92476e+07	6.91816e+07	2.83861e+07	5.31209e+07	5.87724e+07	4.08641e+07	C05623	ko00944,ko01100,ko01110
4',6-Dihydroxy-5,7-dimethoxyflavanone	317.1	197.05	316.095	[M+H]+	Flavonoids	165102	169946	135314	30250.7	36189.1	42543.7	114301	84374.1	120032	C14969	-
Secoisolariciresinol 4-O-glucoside	523.22	361.14	524.226	[M-H]-	Lignans and Coumarins	138049	191213	99131.9	75496.2	78966.4	37280	95385.8	65925.2	81021.2	-	-
Nicotianamine	304.15	185.09	303.143	[M+H]+	Alkaloids	27962.2	29338.3	25657.5	60505.1	86630.3	69671.9	30713.4	26588.2	38046.4	C05324	ko00270,ko00999,ko01100,ko01110
D-Fructose 6-phosphate*	259.02	96.97	260.03	[M-H]-	Others	330432	333631	427937	989366	1.12726e+06	576330	1.08133e+06	752523	1.01647e+06	C00085	ko00052,ko00500,ko00710,ko01100,ko01110,ko01200
L-Aspartic acid-O-diglucoside	458.15	116.03	457.143	[M+H]+	Amino acids and derivatives	7.27619e+06	7.05617e+06	3.01261e+06	4.38264e+06	3166487	5.2787e+06	4.94424e+06	7.02102e+06	5.4941e+06	-	-
Dihydrokaempferol-3-O-glucoside	451.12	289.08	450.116	[M+H]+	Flavonoids	3111445	3124335	4627955	990005	1222505	842505	4393520	3581405	3044440	-	-
Canthin-6-one	221.07	193.08	220.064	[M+H]+	Alkaloids	8634.35	4839.68	10661.1	19035.7	13203.6	14350.3	11668.2	12491.6	8648.94	C09098	-
Gardenin 5-O-Glucoside	581.18	419.13	580.179	[M+H]+	Flavonoids	1.61137e+06	959081	970271	462991	475105	429861	841466	656512	592608	-	-
1-Aminocyclopropane-1-carboxylic acid	102.06	56.05	101.048	[M+H]+	Organic acids	4115.75	7934.84	6468.32	92816.2	103474	103215	36656.2	51795.3	39855.2	C01234	ko00270,ko01100,ko01110
6-Hydroxykaempferol-3,6-O-Diglucoside*	627.16	303.05	626.148	[M+H]+	Flavonoids	557694	495167	537729	596959	589312	608272	503198	610934	733699	-	-
Isorhamnetin-7-O-glucoside (Brassicin)*	479.12	317.06	478.111	[M+H]+	Flavonoids	2.29924e+06	2.17157e+06	2.03386e+06	853022	615510	1715005	1.98778e+06	1.48988e+06	1.42676e+06	-	-
Luteolin-6-C-(5''-glucuronyl)xyloside	595.13	505.09	594.122	[M+H]+	Flavonoids	322334	372721	357500	1.26516e+06	743535	802335	582312	528254	398002	-	-
5-Hydroxy-2-Carbonylcadinane-12,7-lactone (iso-2)	265.14	135.08	264.136	[M+H]+	Terpenoids	203372	177746	218202	62347.1	97283.4	98846.3	133439	123962	91528.2	-	-
Natsudaidain-3-O-(5'-glucosyl-3-hydroxy-3-methylglutarate)glucoside	887.28	725.23	886.274	[M+H]+	Flavonoids	27862.6	28975	36963.2	35451.3	44616.4	65158.2	39554.2	26918.4	34980.7	-	-
Stilbostemin B	229.12	201.13	228.115	[M+H]+	Phenolic acids	16807.7	18679.9	20080.4	58683.4	72329.7	64165.4	33674.6	37483.7	25484.5	-	-
Apigenin-8-C-(2''-glucosyl)arabinoside	565.16	457.11	564.148	[M+H]+	Flavonoids	72505	80005	50005	105005	147505	125005	95005	102505	70005	-	-
(S)-3-(2-oxopropyl)-3-hydroxyindolin-2-one	206.08	120.09	205.074	[M+H]+	Alkaloids	1.62787e+06	1.44212e+06	1.26334e+06	1.49312e+06	1.27938e+06	1.21612e+06	1.5244e+06	1.06812e+06	1.16596e+06	-	-
Feruloylcaffeoyltartaric acid	487.09	193.06	488.096	[M-H]-	Phenolic acids	75390.3	96274.3	132602	749072	822748	1.0426e+06	228021	267128	180764	-	-
Naringenin-7-O-Rutinoside(Narirutin)*	579.17	271.06	580.179	[M-H]-	Flavonoids	6.13548e+06	5.91134e+06	9.80072e+06	1.25462e+07	1.29644e+07	1.26184e+07	1.16149e+07	9.83254e+06	1.43832e+07	C09793	-
Lumazine	165.04	120.02	164.033	[M+H]+	Nucleotides and derivatives	37844.1	32277.2	51084.9	58429.2	53635.1	46190.4	28434.9	40824.8	40421.8	C03212	-
6-Hydroxykaempferol-7-O-glucoside	465.1	303.1	464.096	[M+H]+	Flavonoids	6.87257e+06	8.84317e+06	1.00168e+07	1.12114e+07	8.46881e+06	1.11898e+07	7.6725e+06	1.13216e+07	1.0424e+07	-	-
Diisooctyl Phthalate*	391.28	149.02	390.277	[M+H]+	Phenolic acids	3.19552e+07	6.80579e+07	7.53647e+07	8.08644e+07	1.79457e+06	1.50547e+06	326567	482127	391517	C14577	-
Marmesin Rutinoside	555.21	247.1	554.2	[M+H]+	Lignans and Coumarins	1.00241e+07	6.8969e+06	8.06502e+06	457505	874547	80005	5.84703e+06	3.9272e+06	5.15284e+06	-	-
LysoPE 15:1	438.26	297.24	437.254	[M+H]+	Lipids	9134.61	11717.5	8363.92	65232.4	81957.8	80954.5	30118.6	28103	40144.6	-	-
Hispidulin-8-C-(2''-O-glucosyl)glucoside	625.18	463.13	624.169	[M+H]+	Flavonoids	3.76039e+06	4.07989e+06	4.72032e+06	1.60399e+06	1.45558e+06	1.17595e+06	1.50433e+06	2.1055e+06	2.21573e+06	-	-
justicidin B	365.1	321.11	364.095	[M+H]+	Lignans and Coumarins	40875.5	46865.3	47999.4	20919.8	18743.4	12934.7	28827.1	36633	43109.6	C10636	-
δ-Tridecalactone	213.18	81.07	212.178	[M+H]+	Lipids	65069.5	43877.1	19554.4	126841	181302	204996	96370.8	66474.9	73735.8	-	-
Apigenin-7-O-(6''-p-Coumaryl)glucoside	579.15	271.06	578.142	[M+H]+	Flavonoids	614962	647433	478154	922558	870264	896233	806797	543706	648420	-	-
4-Acetamidobutyric acid	146.08	86.06	145.074	[M+H]+	Organic acids	1.18566e+06	1.015e+06	905207	1.63021e+06	1.73662e+06	2.27858e+06	992774	1.47769e+06	1.19706e+06	C02946	ko00330,ko01100
p-Coumaric acid methyl ester	179.07	147.04	178.063	[M+H]+	Phenolic acids	211988	182951	168788	382029	367021	389709	220941	224228	309409	-	-
Naringin Dihydrochalcone	583.2	275.09	582.195	[M+H]+	Flavonoids	67015.3	60930.7	107870	127689	190888	141166	140734	118185	93847.9	-	-
1,5-Anhydro-D-glucitol	163.06	101.02	164.069	[M-H]-	Others	350599	320474	309135	623844	571204	737057	325166	455290	328623	C07326	-
Isoangenomalin	229.09	175.04	228.079	[M+H]+	Lignans and Coumarins	179981	145132	163920	34677.5	26064.3	17598.2	122898	93552.4	84165.3	-	-
(S)-Peucedanol	265.11	173.06	264.1	[M+H]+	Lignans and Coumarins	319932	343373	460634	113982	94548.2	85108.2	261620	184396	190942	-	-
5-Hydroxy-6,7,4'-Trimethoxyflavone 5-O-glucoside	491.15	329.1	490.147	[M+H]+	Flavonoids	3.08419e+07	6.66865e+07	3.03363e+07	2.16821e+07	2.04653e+07	2.29012e+07	2.06465e+07	2.12642e+07	2.92211e+07	-	-
Hesperetin-7-O-glucoside	465.14	303.09	464.132	[M+H]+	Flavonoids	2.17954e+06	2.56502e+06	2.31271e+06	1.44749e+06	5.58708e+06	4.38598e+06	3.59761e+06	3.47624e+06	4.94005e+06	C16422	ko00941
Sudachitin 5-[6''-(3-Hydroxy-3-Methylglutaryl)Glucoside]	667.19	361.09	666.18	[M+H]+	Flavonoids	1.2378e+06	617008	683144	305208	319548	212296	854572	563983	742005	-	-
Apigenin feruloyl xylosyl malonyl glucoside	827.2	271.06	826.195	[M+H]+	Flavonoids	10736.8	15005	5012.79	128251	167547	145258	47369.2	45296.8	31797	-	-
Kokusaginine	260.09	216.07	259.084	[M+H]+	Alkaloids	10388.4	9956.21	8784.84	32636.6	35009.7	27065.8	20742.1	18600.5	27298.1	C10701	-
Salicylic acid-2-O-glucoside	299.08	137.02	300.084	[M-H]-	Phenolic acids	3.16586e+06	3.64816e+06	8.31053e+06	2.4534e+06	1.65011e+06	1.79229e+06	3.5804e+06	2.69032e+06	2.45302e+06	-	-
Quercetin-3-O-rhamnoside(Quercitrin)	449.11	303.05	448.101	[M+H]+	Flavonoids	4.1406e+06	3.56438e+06	4.33822e+06	7.86229e+06	7.59294e+06	6.35754e+06	5.38785e+06	5.95154e+06	3.93161e+06	C01750	ko00944
Isorhamnetin-3-O-glucoside-7-O-rhamnoside*	625.18	317.07	624.169	[M+H]+	Flavonoids	1.60577e+06	1.67127e+06	1.40238e+06	1.7821e+06	2944000	1.40874e+06	1.79891e+06	1.1872e+06	1.49048e+06	-	-
N-Feruloyl-Cadaverine	279.17	177.05	278.163	[M+H]+	Alkaloids	190895	176212	164198	52263.9	74103.2	40505.4	107478	112151	75163.7	-	-
Gallocatechin-(4α→8)-gallocatechin	611.14	287.05	610.132	[M+H]+	Flavonoids	38562	97505	44870.5	210227	209667	309080	244131	166274	183645	-	-
Laricitrin-3-O-glucoside	495.11	333.07	494.106	[M+H]+	Flavonoids	2.58025e+06	1.53377e+06	1.51932e+06	398069	172410	310614	1.35151e+06	965848	954628	-	-
3,7-Dihydroxychromen-4-one	179.03	77.04	178.027	[M+H]+	Others	102208	93623	121519	36243	27329.2	41929.2	80117.1	53611	61987.2	-	-
Vitexin-7-O-glucoside	595.16	577.16	594.158	[M+H]+	Flavonoids	395207	263025	232943	115069	103100	22875.1	186243	150609	122718	-	-
Chrysoeriol-6,8-di-C-glucoside	625.18	607.17	624.169	[M+H]+	Flavonoids	1.46786e+07	1.50068e+07	1.51204e+07	1.22783e+07	1.05691e+07	4599280	1.02388e+07	1.03804e+07	6.99027e+06	-	-
Kaempferol-3-O-(6''-malonyl)glucoside*	535.11	287.05	534.101	[M+H]+	Flavonoids	52404.8	97078	64983.7	343986	285994	270731	176234	202926	132169	-	-
Isomexoticin	309.13	219.06	308.126	[M+H]+	Lignans and Coumarins	2.38084e+06	3.01238e+06	2.85768e+06	33819.6	22924.8	19089.2	1.55761e+06	2.05344e+06	1.38e+06	-	-
Murrayacarpin A glucoside	369.12	177.05	368.11	[M+H]+	Lignans and Coumarins	955738	845654	1.00673e+06	251825	211208	147976	309529	474655	390631	-	-
Glycyl-tryptophan	262.12	188.07	261.111	[M+H]+	Amino acids and derivatives	139484	101734	133805	230781	163643	139975	136789	162671	105639	-	-
3',5,5',7-Tetrahydroxyflavanone-7-O-glucoside	451.12	289.07	450.116	[M+H]+	Flavonoids	3286840	2815340	3054745	997505	995005	915005	3328145	2510005	3874030	-	-
5'-Deoxy-5'-(methylthio)adenosine	298.1	136.06	297.09	[M+H]+	Nucleotides and derivatives	7.28709e+06	6.4926e+06	8.38692e+06	1.49775e+06	2.01008e+06	1.18951e+06	5.36267e+06	3.69617e+06	3.87654e+06	C00170	ko00270,ko00908,ko01100
Biotin	245.1	227.08	244.088	[M+H]+	Others	178768	131524	110276	21297	30005	14462	68448	44244.1	59283	C00120	ko00780,ko01100,ko01240,ko02010
2-Glucosyl-glucosyloxy-2-phenylacetic acid amide	474.16	312.1	475.169	[M-H]-	Alkaloids	35548.1	33919.6	12170.3	73506.1	62833.9	82037	52856.4	66483	43425.7	-	-
Kaempferol-3-O-neohesperidoside-7-O-glucoside*	757.22	287.06	756.211	[M+H]+	Flavonoids	348739	313328	285333	2.43636e+06	2.09117e+06	2.11301e+06	1.74382e+06	1.54496e+06	1.1274e+06	-	-
Isochlorogenic acid B*	515.12	353.09	516.127	[M-H]-	Phenolic acids	145303	134132	182864	43817.7	79140.9	98050.1	58707	83104.3	90234.6	C10468	-
3-hydroxyphenylacetic acid*	151.04	107.05	152.047	[M-H]-	Phenolic acids	47419.3	32139.6	58855.2	20723.9	17692.3	37231	24353	37610.8	34307.3	C05593	ko00350,ko00360,ko01100
Apigenin-6,8-di-C-arabinoside*	535.14	499.12	534.137	[M+H]+	Flavonoids	100019	76952.9	89803.2	9871.22	5374.3	8884.42	55035.8	66487.3	42866	-	-
D-Sucrose	341.11	119.03	342.116	[M-H]-	Others	1.27396e+06	1.58897e+06	760482	776948	740158	1.71256e+06	739239	1.14907e+06	950429	C00089	ko00052,ko00500,ko01100,ko01110,ko02010
4-O-Sinapoylquinic acid	399.13	207.07	398.121	[M+H]+	Phenolic acids	163050	139681	198527	152482	350005	128360	97925.8	110990	147936	-	-
5,4'-Dihydroxy-7-methoxyflavanone (Sakuranetin)	287.09	167.03	286.084	[M+H]+	Flavonoids	66008.9	49464.5	58581.2	57379.6	67997	60046	73554.8	49882.3	53107.1	C09833	ko00941,ko01110
Myricetin	319.04	153.02	318.038	[M+H]+	Flavonoids	147848	53667.7	127505	53777	235005	74822.7	58506.7	89303.2	68368.4	C10107	ko00941,ko00944,ko01110
Ombuin 5-[6''-(3-Methylglutaconyl)Glucoside]Glucoside	781.22	331.08	780.211	[M+H]+	Flavonoids	68973.6	25005	97505	41013.6	27505	28089.6	34450.6	30394.9	22049.3	-	-
(S)-Canadine	340.15	340.15	339.147	[M+H]+	Alkaloids	17526.7	34123.7	42921.3	108057	168298	116294	56538.5	88177.4	72463.5	C03329	ko00950,ko01100,ko01110
JiangxiBaiyingsu H	309.21	119.09	308.199	[M+H]+	Terpenoids	25140.4	22231.1	15955.2	103368	87606	129610	37868.8	59368.3	50738.4	-	-
5,4'-Dihydroxy-3,6,7,3'-tetramethoxyflavone-4'-O-glucoside	537.16	375.11	536.153	[M+H]+	Flavonoids	5.05124e+06	4.44975e+06	4.10622e+06	636391	655616	767505	3.21338e+06	2.49811e+06	2.08642e+06	-	-
Luteolin-6,8-di-C-glucoside	611.16	593.15	610.153	[M+H]+	Flavonoids	5.88065e+06	4.36679e+06	5.08349e+06	2.91377e+06	172505	2.80119e+06	4.59465e+06	3.147e+06	3.25997e+06	C10102	-
Naringenin-7-O-(6''-malonyl)glucoside	521.13	273.08	520.122	[M+H]+	Flavonoids	1.65119e+06	949967	1.99955e+06	2.85189e+06	3.75105e+06	4.05166e+06	1.94123e+06	2.30123e+06	2.98345e+06	-	-
Hesperetin-8-C-glucoside-3'-O-glucoside	627.19	465.1	626.185	[M+H]+	Flavonoids	226594	239001	175007	297999	253465	265324	395978	254020	316177	-	-
Phellodensin F	503.19	311.13	502.184	[M+H]+	Flavonoids	1.42388e+06	1.19197e+06	1.35913e+06	228602	27505	160229	833759	642402	540569	-	-
Apigenin-6-C-(2''-glucosyl)arabinoside	565.16	427.1	564.148	[M+H]+	Flavonoids	82225.6	52582.7	85005	108038	67970.5	84137.6	78391.3	91888.9	58325.6	-	-
1-O-Caffeoylglycerol	255.09	163.03	254.079	[M+H]+	Phenolic acids	127226	110476	120757	46459.1	33352.2	27319.7	71882.2	48882.2	76207.9	-	-
Isorhamnetin-3-O-rutinoside (Narcissin)*	625.18	317.08	624.169	[M+H]+	Flavonoids	35418470	2.0471e+07	1.86804e+07	2.21017e+07	2.22302e+07	1.85377e+07	1.47471e+07	1.56249e+07	2.19275e+07	-	-
Hesperetin-7-O-neohesperidoside(Neohesperidin)*	611.2	303.09	610.19	[M+H]+	Flavonoids	1.52771e+06	465083	448214	995005	1112505	588931	664647	987505	702502	C09806	ko00941
2-Hydroxy-4-methylpentanoic acid	131.07	85.07	132.079	[M-H]-	Organic acids	56923.9	34437.9	40837.9	51194	59513.9	56571.4	37886.4	55873.9	38870.2	-	-
Phloroglucinol-1-O-β-D-glucopyranoside	287.08	125.02	288.084	[M-H]-	Phenolic acids	4.1759e+06	7.83898e+06	6.71105e+06	2.88419e+06	2.50799e+06	2.07527e+06	2.97864e+06	4.41654e+06	4.70268e+06	-	-
3,6'-Disinapoylsucrose	753.22	547.17	754.232	[M-H]-	Phenolic acids	178121	150234	183273	46195.1	42299.9	42785.9	97231.4	76816.2	61325.8	-	-
γ-Fagarine	230.08	200.04	229.074	[M+H]+	Alkaloids	23930.7	16164.8	19213.7	5574.51	3124.33	3437.18	12995.2	11047.2	8084.99	C10676	-
Apigenin-6-C-glucoside-7-O-Sophoroside	757.22	433.4	756.211	[M+H]+	Flavonoids	27505	181776	128328	46375.2	77758.3	87813.9	73989.8	87978.3	116002	-	-
L-Norleucine*	132.1	86.1	131.095	[M+H]+	Amino acids and derivatives	1.24941e+06	992944	865889	1.89722e+06	2.08471e+06	2.17152e+06	1.06986e+06	1.70113e+06	1.3419e+06	C01933	-
p-Coumaric acid	165.05	119.05	164.047	[M+H]+	Phenolic acids	1.285e+06	2691940	2745915	7383365	6338745	9476095	4281660	2915685	4651420	C00811	ko00130,ko00350,ko00940,ko00950,ko01100,ko01110
Fraxetin (7,8-Dihydroxy-6-methoxycoumarin)	209.04	149.02	208.037	[M+H]+	Lignans and Coumarins	821152	1.01492e+06	2507505	9	9	9	711293	777163	1085005	C09265	ko00999,ko01110
toddalenol	291.12	205.05	290.115	[M+H]+	Lignans and Coumarins	17332	12066.2	13133.6	23624.1	24403.3	33885.9	17226.8	11015.1	12860.6	-	-
Cimifugin-7-O-glucoside	469.17	307.12	468.163	[M+H]+	Others	804928	823519	736545	469810	616302	479354	594949	430571	695696	-	-
Aromadendrin (Dihydrokaempferol)	289.07	215.07	288.063	[M+H]+	Flavonoids	6064.86	1513.02	3270.11	86311.5	97075.2	88290.8	30567.1	36947	22895.5	C00974	ko00941,ko01100,ko01110
Naringenin-6-C-Glucoside	435.13	285.08	434.121	[M+H]+	Flavonoids	495005	350883	370864	384739	397928	80005	602505	410662	409137	-	-
Choline Alfoscerate	258.11	104.11	257.103	[M+H]+	Lipids	157327	90433.4	372114	208248	198571	156595	240378	292262	382179	C00670	ko00564,ko00565
Vitexin-2''-O-galactoside	595.17	433.12	594.159	[M+H]+	Flavonoids	4.9666e+06	4.8647e+06	4.10994e+06	9.90199e+06	1.30651e+07	1.20909e+07	1.16167e+07	1.06683e+07	7.19939e+06	-	-
3-Prenyl-4-O-glucosyloxy-4-hydroxybenzoic acid	367.14	205.08	368.147	[M-H]-	Phenolic acids	115362	227468	260920	6.4002e+06	6.14493e+06	7.11224e+06	2.79699e+06	3.11545e+06	1.91801e+06	-	-
Monohydroxy-hexamethoxyflavone	419.13	404.1	418.126	[M+H]+	Flavonoids	485002	652271	293790	99971.4	104837	91255.6	230539	149439	238464	-	-
Mevalonic acid	147.07	59.01	148.074	[M-H]-	Organic acids	174398	94647.6	92296.2	278425	311308	423702	176169	288474	253422	C00418	ko00900,ko01100,ko01110
N-Acetyl-L-Tryptophan	245.09	203.08	246.1	[M-H]-	Amino acids and derivatives	495778	653998	502960	472456	436963	473549	302324	465358	487164	-	-
Chrysoeriol-7-O-(6''-acetyl)glucoside	503.12	341.1	504.127	[M-H]-	Flavonoids	1.15168e+06	1.48563e+06	1.95589e+06	692138	373122	269776	557320	382609	630711	-	-
Raffinose	503.16	179	504.169	[M-H]-	Others	315954	337068	178094	109686	85851.1	71348.5	114535	69655.7	92055.6	C00492	ko00052,ko01100,ko02010
Quercetin-3-O-(4''-O-glucosyl)rhamnoside*	611.16	303.05	610.153	[M+H]+	Flavonoids	8.01362e+06	7.98421e+06	8.92256e+06	1.60091e+07	1.42426e+07	1.59885e+07	1.50048e+07	9.85572e+06	1.0288e+07	C17563	-
LysoPC 19:2(2n isomer)*	534.36	184.07	533.348	[M+H]+	Lipids	9010.27	19838.5	13997.4	58608.7	184003	110141	66997.4	42810.5	47073.1	-	-
L-Cystine	241.03	151.98	240.024	[M+H]+	Amino acids and derivatives	21969.3	27861.9	41253	36432.7	64799.5	66967.9	25182.4	40166.9	28921.2	C00491	ko00270,ko01100,ko02010
Kaempferol-3,7-O-diglucoside	609.15	285.04	610.153	[M-H]-	Flavonoids	23702.9	34667.5	33913.6	75993.6	87788.9	54427	58280.9	89474.1	60601.8	-	-
Quercetin-7-O-(6''-malonyl)glucoside	551.1	303.05	550.096	[M+H]+	Flavonoids	106517	92492.2	106135	9	9	9	141271	117183	84054.4	-	-
5,7-Dihydroxy-4-methoxyflavone-3-O-xylose-(1-6)-glucose	595.19	127.04	594.159	[M+H]+	Flavonoids	79627.4	157505	70861.4	656722	775924	616559	486913	362331	296539	-	-
β-Pseudouridine	243.06	153.03	244.07	[M-H]-	Nucleotides and derivatives	597422	491212	517761	389435	390961	762147	353810	562887	395086	C02067	ko00240,ko01100
3-Hydroxy-4',5,7-Trimethoxyflavanone	331.12	313.11	330.11	[M+H]+	Flavonoids	49464.2	44247.9	55960	9367.31	22257.9	7495.05	22126.8	37315.8	30374.4	-	-
Luteolin-4'-O-glucoside*	449.11	287.05	448.101	[M+H]+	Flavonoids	1.5221e+06	1.44658e+06	1.5647e+06	3.49932e+06	4.66358e+06	4.6727e+06	1.47084e+06	2.43054e+06	1.81291e+06	-	-
3-Hydroxybutyric acid	103.04	59.01	104.047	[M-H]-	Organic acids	1.95973e+06	1.90073e+06	1.81116e+06	2.61776e+06	3.57545e+06	2.10458e+06	1.63606e+06	2.76389e+06	2.52654e+06	C01089	ko00650,ko01100
Tricin-5-O-Glucoside	491.12	329.1	492.127	[M-H]-	Flavonoids	112300	116498	86062.1	72182.3	135222	73088.4	123436	89991.9	74909	-	-
N-Acetyl-L-leucine	174.11	86.1	173.105	[M+H]+	Amino acids and derivatives	770005	284179	328384	780959	699917	1537505	922505	920005	558094	C02710	-
Gallic acid	169.01	125.02	170.022	[M-H]-	Phenolic acids	3.63345e+06	3.82448e+06	3.6205e+06	1.20458e+06	1.10988e+06	508411	1.95474e+06	1.27328e+06	2.18211e+06	C01424	ko00999
L-Ascorbic acid (Vitamin C)	175.02	87.01	176.032	[M-H]-	Others	192768	205225	150112	292217	392926	362743	205057	185386	298700	C00072	ko00053,ko00480,ko01100,ko01110,ko01240
Trehalose 6-phosphate	421.08	241.01	422.082	[M-H]-	Others	88646.3	82508.4	108588	241092	174134	251287	78966.1	118314	136385	C00689	ko00500,ko01100,ko01110
Arg-Gly	232.14	70.07	231.133	[M+H]+	Amino acids and derivatives	1.06146e+06	1.23085e+06	1.16191e+06	531226	469599	511674	579140	1.00316e+06	811809	-	-
3,23-Dihydroxy-30-noroleana-12,20(29)-dien-28-oic acid (30-Norhederagenin)	455.32	455.32	456.324	[M-H]-	Terpenoids	74706	93847.2	87736.7	78213	64145	77647.7	94344	56945.5	95543.5	-	-
Limocitrin-3-O-glucoside	509.13	347.07	508.122	[M+H]+	Flavonoids	2.08521e+06	1.92518e+06	1.65257e+06	389054	505406	534905	1.77526e+06	1.06293e+06	1.27227e+06	-	-
Luteolin-6-C-glucoside-7-O-rhamnoside	595.17	449.11	594.159	[M+H]+	Flavonoids	1.96557e+06	2.51456e+06	3480560	1575005	707027	656304	3452130	2756195	1990005	-	-
4-Hydroxycoumarin di-glucoside	485.13	323.2	486.137	[M-H]-	Lignans and Coumarins	107128	108478	124967	74004.3	73156.3	144555	104678	67039.1	67870.7	-	-
Coumarin	147.04	91.05	146.037	[M+H]+	Lignans and Coumarins	1462505	1580005	1295005	1.12476e+07	1.11901e+07	1.22049e+07	9706175	12134310	6.94353e+06	C05851	ko00999,ko01110
LysoPE 16:1*	452.28	311.26	451.27	[M+H]+	Lipids	6434.51	1611.46	13081.8	93597.8	127690	108955	33418.4	40181.3	56278.7	-	-
Ferulic acid	193.05	134.04	194.058	[M-H]-	Phenolic acids	4.33125e+06	5.98368e+06	4.53772e+06	2.44941e+06	2.24752e+06	1.8799e+06	3.16107e+06	3.1898e+06	4.95473e+06	C01494	ko00940,ko01100,ko01110
5,6,3',4'-Tetrahydroxy-3,7-dimethoxyflavone	347.07	315.06	346.069	[M+H]+	Flavonoids	162505	70932.8	125005	25005	25005	27505	140005	141788	220005	-	-
L-Glycyl-L-proline	173.09	116.07	172.085	[M+H]+	Amino acids and derivatives	233348	81935.4	109288	27312.2	33203.6	47701.1	104604	63753.5	69646.1	-	-
Isovitexin-2''-O-xyloside	565.15	433.11	564.148	[M+H]+	Flavonoids	282586	377016	278536	820989	689368	540043	316204	347824	521055	-	-
1-Methyl-2-[(Z)-6-undecyl]-4(1H)-quinolone	312.23	81.07	311.225	[M+H]+	Alkaloids	15153.6	26382.6	16632	70442.2	59427.1	68355.6	32306.5	19409.5	21657.3	-	-
5-Hydroxy-7,8,2',3'-Tetramethoxyflavone 5-Glucoside	521.16	359.11	520.158	[M+H]+	Flavonoids	649429	427223	501133	15190.2	17870.9	19840.7	427505	282007	259850	-	-
Myricetin-3-O-galactoside*	481.1	319.06	480.09	[M+H]+	Flavonoids	766384	634944	615574	5538335	5582970	2.13528e+06	1.94239e+06	3434040	3237810	-	-
Creatine	130.09	88.04	131.07	[M-H]-	Organic acids	305413	259339	64912.7	291108	344417	301942	391788	233522	413280	C00300	ko00260,ko00330,ko01100
Nicotinic acid adenine dinucleotide	664.12	136.06	663.109	[M+H]+	Nucleotides and derivatives	58637	47895.4	35643.9	21977.6	37824.6	27472.4	43047.8	26831	27254.6	C00003	ko00190,ko00730,ko00760,ko01100,ko01240
L-Proline	116.07	70.07	115.063	[M+H]+	Amino acids and derivatives	2.11999e+06	2.617e+06	2.14794e+06	714935	784506	1.10335e+06	1.3711e+06	2.13878e+06	1.31542e+06	C00148	ko00330,ko00470,ko00970,ko01100,ko01110,ko01230,ko02010
Aminomalonic acid	118.01	74.02	119.022	[M-H]-	Organic acids	282384	233399	314016	1.59685e+06	710311	738507	577872	320722	449448	C00872	-
7-Hydroxy-β-carboline-1-propionic acid	257.09	211.09	256.085	[M+H]+	Alkaloids	420394	313713	318010	73144.2	108800	112364	228102	138934	146302	-	-
N-Feruloylserotonin	353.15	177.05	352.142	[M+H]+	Alkaloids	61312.7	75819.7	64244.7	5005	6100.21	6141.18	27008.7	43026	49514.3	-	-
5,7,2',5'-Tetrahydroxy-8,6'-dimethoxyflavone	347.08	332.06	346.069	[M+H]+	Flavonoids	1.24548e+06	792508	3.19327e+06	4.22361e+06	7.11468e+06	5.33682e+06	1.64911e+06	3.03472e+06	2.57516e+06	-	-
Myricetin-3-O-β-D-glucoside*	481.1	319.04	480.09	[M+H]+	Flavonoids	628584	1027505	633585	2.59368e+06	2.82615e+06	2.05424e+06	1.77961e+06	2887375	1.81206e+06	-	-
Grandisine III	288.09	273.06	287.079	[M+H]+	Alkaloids	28270.4	25597.3	32144	2230.49	2672.05	1521.38	14322.8	13249.5	7879.3	-	-
Hispidulin-7-O-glucoside(Homoplantaginin)	463.13	301.07	462.116	[M+H]+	Flavonoids	1.28597e+07	7.52795e+06	1.50639e+07	1845005	1.02257e+07	1.11342e+07	1.42272e+07	18063995	9.85155e+06	C17762	-
LysoPE 18:1(2n isomer)*	480.31	339.29	479.301	[M+H]+	Lipids	53099.9	29864	46766.7	535435	761530	522072	329820	323722	181818	-	-
Kaempferol-3-O-(2''-O-acetyl)glucoside	491.12	287.05	490.111	[M+H]+	Flavonoids	36342	72832.1	45516.7	279562	283733	142771	109752	142666	199691	-	-
L-Lysine-Butanoic Acid	235.17	118.09	234.158	[M+H]+	Amino acids and derivatives	76611	83574.6	85719.1	243315	247403	342186	190183	301489	177253	-	-
2-Ethyl-2,6,6-trimethylpiperidin-4-one	170.15	152.14	169.147	[M+H]+	Alkaloids	347395	321212	270827	256285	418751	215005	473509	295042	564256	-	-
Luteolin-7,3'-di-O-glucoside*	611.16	287.06	610.153	[M+H]+	Flavonoids	424742	952505	972505	170005	80526.2	85166.4	306510	257584	460005	-	-
Epiafzelechin	275.09	107.05	274.084	[M+H]+	Flavonoids	202505	187505	195005	67505	52505	34736.7	95005	105005	54931.3	C12128	ko00941,ko01110
Apigenin-7-O-neohesperidoside (Rhoifolin)*	579.17	271.07	578.164	[M+H]+	Flavonoids	575443	532182	615042	1.01607e+06	828335	953993	991258	587086	604634	C12627	ko00944
Quinacyl syringic acid	371.1	179.1	372.106	[M-H]-	Phenolic acids	1.03532e+06	889635	278215	468208	475518	455586	550047	313684	602710	-	-
Gallocatechin gallate	459.09	139.04	458.085	[M+H]+	Flavonoids	105533	92343.9	102278	220983	285683	247889	183159	123450	100344	-	-
2,4-Dihydroxyquinoline	162.06	116.05	161.048	[M+H]+	Alkaloids	31579.2	48710.2	15005	37243.3	70005	24832.3	34138.5	37505	60005	C16716	ko00996
Luteolin-7-O-gentiobioside*	611.16	287.05	610.153	[M+H]+	Flavonoids	475838	523199	298924	113077	101758	108952	240533	239505	405005	-	-
Murraol glucoside	423.17	243.1	422.157	[M+H]+	Lignans and Coumarins	296359	328708	304100	9	9	9	343249	241726	179583	-	-
Sideretin (5,7,8-Trihydroxy-6-methoxycoumarin)	223.03	149.03	224.032	[M-H]-	Lignans and Coumarins	110593	101575	127630	378241	431381	369991	242101	206047	378266	C22007	ko00999,ko01110
3',5',5,7-Tetrahydroxy-4'-methoxyflavanone-3'-O-glucoside	481.13	319.05	480.127	[M+H]+	Flavonoids	401744	654024	591205	2.68131e+06	2.5422e+06	1.64618e+06	2392505	1.22112e+06	1.7278e+06	-	-
Hesperetin-6-C-glucoside-7-O-glucoside	627.19	465.2	626.185	[M+H]+	Flavonoids	244746	241846	210330	887505	834957	454110	449271	357505	222191	-	-
Kaempferol-3-O-glucoside-7-O-rhamnoside*	595.17	287.06	594.159	[M+H]+	Flavonoids	51954785	1.89493e+07	54163510	16884650	12040505	13270845	1.69991e+07	33137580	32828215	-	-
7,8-Dihydroxyrutaecarpine	320.1	232.1	319.096	[M+H]+	Alkaloids	19701.8	25001.2	27354.8	23012.7	21709.4	9987.43	7818.78	13029.1	7382.76	-	-
Glucarate O-Phosphoric acid	289	96.97	290.004	[M-H]-	Others	1.69398e+06	1.14807e+06	2.00812e+06	1.39252e+06	1.30822e+06	767868	1.5456e+06	779659	1.06589e+06	-	-
Limocitrin-3-O-(3-hydroxy-3-methylglutarate)glucoside	653.17	347.1	652.164	[M+H]+	Flavonoids	5.76167e+06	4.91382e+06	5.21972e+06	1.1627e+06	1.3426e+06	1.5204e+06	2.27949e+06	3.43464e+06	1.75013e+06	-	-
2-(Acetylamino)-3-phenyl-2-propenoic acid	206.08	118.07	205.074	[M+H]+	Alkaloids	86120.8	62258.3	109990	166543	125695	123491	166339	120009	81154	-	-
1-Caffeoyl-6-Erythrosyl-Beta-D-Glucose	459.11	161.02	460.122	[M-H]-	Phenolic acids	103900	120129	51434.1	13504.3	8338.66	20574.3	40734.7	19133.8	32882.9	-	-
1-Methyladenine	150.08	133.05	149.07	[M+H]+	Nucleotides and derivatives	1.09803e+07	1.10003e+07	1.02896e+07	7.80224e+06	7.95834e+06	8.99544e+06	1.01274e+06	2.17428e+06	1.76041e+06	C02216	-
Limocitrin-3-O-galactoside	509.13	347.07	508.122	[M+H]+	Flavonoids	2.31279e+06	4.87688e+06	4.59047e+06	267286	738365	425005	1.16781e+06	2170005	2507505	-	-
Troxerutin	743.24	435.14	742.232	[M+H]+	Flavonoids	162891	110900	182601	163479	184144	309617	183136	196077	92125.4	-	-
S-(Methyl)glutathione	322.11	130.05	321.099	[M+H]+	Amino acids and derivatives	40302.9	32059	38465.9	73638.5	117205	62826.2	77836.2	168890	135589	C11347	-
4-O-Caffeoylquinic acid methyl ester	369.11	207.1	368.111	[M+H]+	Phenolic acids	120005	108600	52505	44699.1	44699.1	42667.6	112505	61805.6	62505	-	-
L-Glycyl-L-phenylalanine*	223.11	120.09	222.1	[M+H]+	Amino acids and derivatives	2.06839e+06	1.68468e+06	1.94857e+06	2.68409e+06	2.78897e+06	2.95291e+06	3.54133e+06	1.86952e+06	2.01677e+06	-	-
Anthranilic Acid	138.06	92.05	137.048	[M+H]+	Phenolic acids	116648	117248	133585	489282	559540	548023	547505	298034	301719	C00108	ko00380,ko00400,ko00996,ko01100,ko01110,ko01230
6,7-Dihydroxy-4-methylcoumarin	193.05	105.07	192.042	[M+H]+	Lignans and Coumarins	2830770	2969745	3651265	450005	148630	227505	1.19918e+06	2666245	2015005	-	-
5-Demethylnobiletin	389.12	359.08	388.116	[M+H]+	Flavonoids	8.54431e+06	1.13109e+07	6.18454e+06	1.85976e+06	2.80081e+06	1.41983e+06	3.24068e+06	6.43027e+06	3.84694e+06	-	-
4'-O-Glucosylvitexin	595.17	433.12	594.159	[M+H]+	Flavonoids	4639461	8318300	7727185	1.39083e+07	24333775	1.31877e+07	1.09903e+07	8.88983e+06	18602620	-	-
Limocitrin-3-O-glucoside-di-O-(3-hydroxy-3-methylglutarate)glucoside	959.26	347.08	958.258	[M+H]+	Flavonoids	2.51681e+06	9492325	3.63407e+06	359722	381262	364030	4042640	2.02097e+06	2.2193e+06	-	-
Isoguanine	152.06	135.03	151.049	[M+H]+	Nucleotides and derivatives	70672	70020.2	66293.1	51056.4	66080.3	48551.8	48060.2	116895	94608.3	-	-
D-Sedoheptuiose 7-phosphate	289.03	96.97	290.04	[M-H]-	Others	437616	408502	518092	506588	546810	335867	2.12937e+06	1.05408e+06	2.59589e+06	-	-
Synephrine; 4-[1-Hydroxy-2-(methylamino)ethyl]phenol	168.1	150.09	167.095	[M+H]+	Alkaloids	4.42601e+06	6.86235e+06	5.26572e+06	4.27505e+06	6.89787e+06	5.56613e+06	5.38462e+06	6.24586e+06	2.5394e+06	C04548	-
Uracil	111.02	67.03	112.027	[M-H]-	Nucleotides and derivatives	21716.6	20344.3	41637.4	72074.5	180834	158421	81319.1	200246	160116	C00106	ko00240,ko00410,ko00770,ko01100,ko01232
Tricin-7-O-(2''-O-glucosyl)glucoside	655.19	331.08	654.18	[M+H]+	Flavonoids	506048	525005	470005	49648.5	32505	50835.1	160005	90519.2	220830	-	-
N-Formyl-L-Methionine	178.05	161.03	177.046	[M+H]+	Amino acids and derivatives	83357.8	119005	102969	87186.4	136931	60832.1	54538.7	137713	123416	C03145	ko00270
L-Homocysteine	136.04	118.03	135.035	[M+H]+	Amino acids and derivatives	102739	116349	92293.8	67733.4	69484.8	41586.9	65293.3	114457	52398.8	C00155	ko00270,ko00920,ko01100,ko01110,ko01230
Luteolin-7-O-neohesperidoside (Lonicerin)	595.17	287.06	594.159	[M+H]+	Flavonoids	2.37281e+07	1.98938e+07	43862590	16695815	16384555	6.30318e+06	1.79387e+07	44194730	30805805	C12630	ko00944
Kaempferol-3-O-neohesperidoside*	595.16	287.06	594.159	[M+H]+	Flavonoids	2.06302e+07	49353445	52541395	20123570	7.45509e+06	15308110	39242945	15840950	27638230	-	-
Quercetin-3-O-(6''-O-acetyl)galactoside	505.1	300.03	506.106	[M-H]-	Flavonoids	77259.1	73083.1	48481.6	99657.4	125181	119144	138333	57651.6	89895.5	-	-
Kaempferol-3-O-arabinoside	419.1	287.05	418.09	[M+H]+	Flavonoids	60814.9	65097.4	242505	137505	210005	180005	69479.4	180005	157505	-	-
Dehydrovomifoliol	207.14	95.09	206.131	[M+H]+	Terpenoids	3488315	3581405	2552505	390955	897505	532042	719157	943894	1630005	-	-
Isorhamnetin-3-O-rutinoside-7-O-rhamnoside*	771.23	317.06	770.227	[M+H]+	Flavonoids	281964	552505	707505	2.86671e+06	4766205	6183025	1.86226e+06	4633170	3129490	-	-
Apigenin-6-C-arabinoside-8-C-xyloside*	535.14	499.12	534.137	[M+H]+	Flavonoids	98624.8	109797	79580.9	8260.13	2505	10857.4	87505	41428.4	46186.3	-	-
Isoschaftoside	565.16	409.09	564.148	[M+H]+	Flavonoids	97505	45005	52505	127505	54569	90005	34466.7	92505	82505	-	-
Quercetin-3-O-(6''-O-acetyl)glucoside	507.12	303.05	506.106	[M+H]+	Flavonoids	68652.4	46984.7	40707.7	268763	112404	157913	77432.5	38524.8	103237	-	-
5-Hydroxy-3,7,4'-trimethoxyflavone	329.1	314.08	328.095	[M+H]+	Flavonoids	1.10279e+06	399727	348703	33272	27560.1	29475.9	259061	219191	485232	-	-
Quercetin-3-O-(2''-O-galactosyl)glucoside	627.16	465.1	626.148	[M+H]+	Flavonoids	597684	1415005	1717505	2200005	2653400	979772	706100	1.02141e+06	1720005	-	-
2'-Deoxyuridine	227.07	184.06	228.075	[M-H]-	Nucleotides and derivatives	18741.6	16056.1	77874.9	26019.6	39994.7	49391.3	113074	42153	115285	C00526	ko00240,ko01100,ko01232,ko02010
1,5-dihydroxy ketone-6 murine O-β-D-glucoside(ISO1)	423.09	261.04	422.085	[M+H]+	Others	591000	492601	657505	475005	228841	230764	643108	226320	604851	-	-
5-O-Feruloylquinic acid	735.22	367.11	368.111	[2M-H]-	Phenolic acids	872068	853019	935054	33447.3	17544.5	24474.4	87007.3	50626.9	135906	-	-
Rhamnetin-3-O-Rutinoside-5-O-rhamnoside*	771.22	317.06	770.227	[M+H]+	Flavonoids	213971	797505	620005	7431285	6751365	7372720	1.42291e+06	2859070	4066005	-	-
Dillapiol	223.1	191.07	222.089	[M+H]+	Others	362521	700002	716603	9	9	9	634587	275918	314812	C10449	-
Murrayacarpin A	207.07	131.05	206.057	[M+H]+	Lignans and Coumarins	205016	194579	274135	925005	534847	400448	281656	286446	620005	-	-
Phloretin 3',5'-Di-C-Glucoside	599.2	431.13	598.19	[M+H]+	Flavonoids	1.12233e+06	2465005	3762600	4810580	4364895	4505480	1.34331e+06	1.62587e+06	3240390	-	-
Tricin-5,7-O-diglucoside	655.18	331.06	654.18	[M+H]+	Flavonoids	545005	192047	179982	42505	32811.6	25400.5	215005	90996.5	104229	-	-

## Sheet: Supplementary Table S2.
Supplementary Table S2. A list of differential metabolites between Peel and Pulp
Compounds	Class	Peel-1	Peel-2	Peel-3	Pulp-1	Pulp-2	Pulp-3	VIP	Fold_Change	Log2FC	Type
Hesperetin	Flavonoids	6.72838e+06	5.38833e+06	7.27888e+06	2.41603e+07	2.10751e+07	2.23058e+07	1.13005	3.4823	1.80004	up
9,10,11-Trihydroxy-12-octadecenoic acid	Lipids	291220	282971	277768	1.00243e+06	844110	990203	1.13882	3.32967	1.73538	up
9(10)-EpOME;(9R,10S)-(12Z)-9,10-Epoxyoctadecenoic acid	Lipids	903135	1.15575e+06	915375	221005	173100	249621	1.12705	0.216432	-2.20801	down
L-Prolyl-L-Phenylalanine	Amino acids and derivatives	3.33685e+06	2.87754e+06	2.7057e+06	6.99382e+06	7.19143e+06	7.18751e+06	1.13248	2.39603	1.26064	up
Cordycepin (3'-Deoxyadenosine)*	Nucleotides and derivatives	6.25552e+06	4.64722e+06	6.37761e+06	1.64208e+07	1.46267e+07	1.8311e+07	1.11482	2.85634	1.51417	up
5-Hydroxy-6,7,3',4'-tetramethoxyflavone*	Flavonoids	6.27475e+06	6.81745e+06	6.01464e+06	560738	530622	470861	1.14266	0.0817623	-3.61242	down
7-Methoxycoumarin	Lignans and Coumarins	957909	718256	531289	112667	112738	122920	1.12408	0.157795	-2.66388	down
3-O-Methylgallic Acid	Phenolic acids	122687	96556.3	103944	40248.3	30181	40601.6	1.11663	0.34355	-1.54141	down
LysoPE 17:0	Lipids	13489.6	11043.4	13853.5	445793	562648	408470	1.14162	36.9117	5.20601	up
3,5,6,7,8,4'-Hexamethoxyflavone*	Flavonoids	5.35988e+06	4.74349e+06	5.1559e+06	948312	1.06211e+06	1.10808e+06	1.14093	0.204368	-2.29076	down
21,23:24,25-Diepoxy-21-hydroxylanost-7-en-3-one (Melianone)	Terpenoids	5.8639e+06	5.32489e+06	7.21071e+06	2.96161e+06	2.64465e+06	3.39185e+06	1.08914	0.489041	-1.03197	down
5,7,4'-trimethoxyflavone	Flavonoids	1.36594e+07	1.4268e+07	1.34269e+07	1.19717e+06	1.31018e+06	892678	1.13914	0.0822169	-3.60442	down
LysoPC 14:0	Lipids	25560.5	22908.1	19914.8	185024	265014	215205	1.13717	9.72813	3.28216	up
LysoPE 18:3*	Lipids	142171	48830.3	70728.3	1.34484e+06	1.93661e+06	1.39408e+06	1.11611	17.864	4.15898	up
Kaempferol-3-O-sophoroside-7-O-rhamnoside*	Flavonoids	436726	373348	90005	2.38676e+06	2.46173e+06	2.15186e+06	1.04433	7.77747	2.9593	up
5,6,7,4'-Tetramethoxyflavanone	Flavonoids	1.56933e+07	1.59084e+07	1.54423e+07	2.23319e+06	2.21657e+06	2.34185e+06	1.14387	0.144367	-2.79219	down
LysoPC 18:1	Lipids	465474	232616	425678	8.92025e+06	1.19323e+07	1.02377e+07	1.13316	27.666	4.79004	up
2-Methylglutaric acid	Organic acids	184327	143457	156020	401891	368795	396111	1.12636	2.41171	1.27006	up
Syringetin	Flavonoids	9.63174e+06	8.24176e+06	9.01444e+06	2.02287e+06	1.69765e+06	1.6697e+06	1.13919	0.20047	-2.31854	down
7-Hydroxy-2',5,8-Trimethoxyflavanone	Flavonoids	781110	836030	859270	110228	115693	90838.7	1.14073	0.127911	-2.96679	down
Acerosin	Flavonoids	9.23686e+06	9.11449e+06	7.93016e+06	198368	202362	163415	1.14302	0.0214655	-5.54184	down
Hexadecanedioic acid	Lipids	1.46812e+06	1.42559e+06	1.50364e+06	351791	306488	343070	1.14209	0.227716	-2.13469	down
N-Methyltryptamine	Alkaloids	3.1156e+07	3.13735e+07	3.2597e+07	1.28355e+07	6.62506e+06	9.38517e+06	1.09281	0.303236	-1.72149	down
Orange I	Alkaloids	1.10247e+06	1.09089e+06	662226	6.85213e+06	6.45126e+06	4.40799e+06	1.11308	6.20237	2.63282	up
3-O-p-Coumaroylquinic acid*	Phenolic acids	5.03587e+06	4.99155e+06	5.17906e+06	2.41943e+06	2.07581e+06	2.87604e+06	1.10773	0.484746	-1.0447	down
Benzamide	Phenolic acids	1.37923e+06	1.30628e+06	1.27994e+06	2.7804e+06	2.99204e+06	3.13383e+06	1.13825	2.24597	1.16734	up
8-Geranyloxypsoralen	Lignans and Coumarins	5.62778e+06	5.05557e+06	4.68118e+06	2.98445e+07	2.95629e+07	3.12327e+07	1.14181	5.89931	2.56055	up
L-Homocystine	Amino acids and derivatives	190753	422876	286086	46804.4	30085.8	52365.9	1.09642	0.143663	-2.79923	down
Citrusinine II	Alkaloids	881080	692673	679665	14260.5	12004.9	25757.6	1.13475	0.0230863	-5.43682	down
Lansiumarin B	Lignans and Coumarins	3.71821e+06	3.81995e+06	3.82356e+06	2.48053e+07	2.36418e+07	2.60665e+07	1.14353	6.5583	2.71332	up
Tambulin	Flavonoids	1.36573e+07	1.2748e+07	1.22055e+07	1.57634e+06	1.47282e+06	1.49049e+06	1.1434	0.117575	-3.08835	down
1,3,7-Trimethoxyxanthone	Flavonoids	240937	181793	227388	9318.68	4359.27	4875.39	1.13339	0.0285384	-5.13095	down
Perforamone B	Others	2.697e+07	2.59353e+07	2.65106e+07	375022	371312	362046	1.14408	0.0139567	-6.1629	down
LysoPC 15:0(2n isomer)*	Lipids	139955	90294.2	120459	1.68524e+06	2.51395e+06	1.93987e+06	1.13581	17.5047	4.12967	up
Tangeretin (4',5,6,7,8-Pentamethoxyflavone)*	Flavonoids	6.03476e+07	5.32461e+07	4.98432e+07	4.11525e+06	4.078e+06	4.06123e+06	1.14305	0.0749799	-3.73735	down
Bergaptol	Lignans and Coumarins	1.6007e+06	1.73719e+06	1.79585e+06	1.29879e+07	1.54718e+07	1.43556e+07	1.14231	8.33998	3.06004	up
9,12,13-Trihydroxy-10,15-octadecadienoic acid	Lipids	385855	370212	383179	1.14332e+06	1.1553e+06	1.18154e+06	1.14362	3.0548	1.61108	up
3-Hydroxy-3-methylpentane-1,5-dioic acid	Amino acids and derivatives	3.33787e+07	3.57114e+07	3.15926e+07	7.55303e+07	6.64197e+07	7.2144e+07	1.1334	2.12642	1.08843	up
Carvylacetate	Terpenoids	186300	192122	225090	636827	636847	647131	1.13828	3.18271	1.67026	up
2,4-Di(2-Methylbutanoyl)-3-(3-Methylpentanoyl)Sucrose-6'-O-Acetate*	Others	206654	238484	173965	3534	3296	3237.96	1.14288	0.0162622	-5.94234	down
Zanthoxyloside	Lignans and Coumarins	980011	1.27742e+06	1.12973e+06	98243.4	57649.4	33702.9	1.11892	0.0559748	-4.15908	down
Succinyladenosine	Nucleotides and derivatives	2.63872e+06	2.76808e+06	2.6517e+06	6.44891e+06	6.17888e+06	7.37013e+06	1.13573	2.48159	1.31127	up
Echinopsine	Alkaloids	2.24448e+06	2.16817e+06	2.64173e+06	1.31234e+07	1.21405e+07	9.82687e+06	1.13413	4.97432	2.3145	up
Dihydroxy-dimethoxyflavone*	Flavonoids	1.37214e+07	1.21582e+07	1.30318e+07	3.0082e+06	2.82236e+06	3.51827e+06	1.13803	0.240259	-2.05734	down
Machilusolide D	Others	7.0943e+06	6.82994e+06	7.17864e+06	2.19884e+07	2.21245e+07	2.30259e+07	1.14336	3.1815	1.66971	up
3-Dehydro-L-Threonic Acid	Others	9.11059e+06	1.15958e+07	1.45722e+07	3.0954e+07	4.24601e+07	3.39941e+07	1.0981	3.04456	1.60624	up
9,10-Dihydroxy-12,13-epoxyoctadecanoic acid	Lipids	943428	926913	864001	2.06728e+06	1.99421e+06	2.00555e+06	1.14101	2.21883	1.1498	up
Citraconic acid	Organic acids	434276	535596	539867	1.15117e+06	930060	1.64379e+06	1.05831	2.46732	1.30295	up
Vanillin; 4-Hydroxy-3-Methoxybenzaldehyde	Phenolic acids	1.64445e+06	1.603e+06	1.54257e+06	726261	766817	793167	1.13984	0.477293	-1.06705	down
Gardenin A	Flavonoids	2.89075e+07	2.88133e+07	2.71287e+07	7.81412e+06	7.81088e+06	7.93824e+06	1.14346	0.277707	-1.84837	down
LysoPE 16:0*	Lipids	570942	339958	401951	2.78296e+06	3.71462e+06	2.29548e+06	1.11796	6.69769	2.74366	up
5-Hydroxy-3,7,3',4'-tetramethoxyflavone (Retusin)*	Flavonoids	6.85527e+06	6.89106e+06	6.4833e+06	518173	468443	411941	1.14263	0.0691341	-3.85446	down
3',4',5',5,7-Pentamethoxyflavone*	Flavonoids	6.26736e+07	5.67427e+07	3.38357e+07	2.98116e+06	2.74232e+06	3.19739e+06	1.13314	0.0582105	-4.10258	down
3,5,6,7,8,3',4'-Heptamethoxyflavone	Flavonoids	1.32707e+07	1.25128e+07	1.33785e+07	1.89671e+06	2.00157e+06	2.0685e+06	1.14338	0.152361	-2.71443	down
toddanol	Lignans and Coumarins	45292.3	36283.9	32695.5	9569.77	7251.57	11800.6	1.11151	0.250472	-1.99728	down
2,4-Di(2-Methylbutanoyl)-3-(3-Methylpentanoyl)Sucrose-6-O-Acetate*	Others	198684	211847	162264	1998.92	2045.13	1640.91	1.14288	0.00992493	-6.65473	down
α-Hydroxycinnamic Acid*	Phenolic acids	5.54082e+06	8.64041e+06	8.30816e+06	2.05137e+07	1.96511e+07	2.08477e+07	1.10149	2.71295	1.43986	up
Hydroxyrudicoumarin C glucoside	Lignans and Coumarins	64032.8	67505	45714.8	830005	574921	1147505	1.1265	14.4	3.84799	up
LysoPE 15:0(2n isomer)*	Lipids	39483.9	23317.5	35713	392544	542915	365898	1.13041	13.2098	3.72354	up
7-Methoxy-8-(l'-methoxy-2'-hydroxy-3'-methyl-3'-butenyl)coumarin	Lignans and Coumarins	2.52069e+07	2.80211e+07	2.63177e+07	429861	366605	351127	1.14353	0.0144268	-6.1151	down
9-Hydroxy-12-oxo-10(E),15(Z)-octadecadienoic acid	Lipids	397807	390143	452869	1.12307e+06	1.03509e+06	1.13453e+06	1.13681	2.65364	1.40797	up
Altisin*	Flavonoids	6.50927e+06	4.71676e+06	4.31449e+06	1.24228e+06	1.31498e+06	1.10464e+06	1.12438	0.235636	-2.08537	down
Guanosine 3',5'-cyclic monophosphate	Nucleotides and derivatives	206461	274547	178130	501964	436901	514017	1.08328	2.20421	1.14026	up
LysoPE 15:0*	Lipids	39561.8	22136.1	29327.9	393110	535265	364726	1.13084	14.2059	3.82841	up
2-Isopropylmalic Acid	Organic acids	1.9309e+06	2.01411e+06	2.35502e+06	4.99347e+06	4.03708e+06	3.77291e+06	1.09721	2.03229	1.0231	up
Vanilloloside	Phenolic acids	1.32829e+07	1.75307e+07	1.61972e+07	643918	625499	702328	1.14223	0.0419424	-4.57545	down
9-Hydroxy-13-oxo-10-octadecenoic Acid	Lipids	827504	878290	864145	393984	377397	328074	1.13369	0.427814	-1.22495	down
5-hydroxyl-3',4',7,8-tetramethoxyl flavone*	Flavonoids	6.75744e+06	4.87426e+06	4.52853e+06	1.41541e+06	1.37238e+06	1.21418e+06	1.12407	0.247643	-2.01367	down
7-Hydroxy-3,5,6,8-tetramethoxyflavone*	Flavonoids	8.04125e+06	7.98952e+06	6.94332e+06	479825	523535	429589	1.14243	0.0623724	-4.00295	down
4-O-p-Coumaroylquinic acid	Phenolic acids	245341	249563	299391	529839	514920	563979	1.12293	2.02537	1.01818	up
1-Acetyl-β-carboline	Alkaloids	189417	215936	183905	423200	496551	503537	1.12842	2.41539	1.27226	up
Eriostemin	Flavonoids	1.82155e+06	1.80838e+06	1.63798e+06	77028.1	98050.8	77544.7	1.14219	0.0479552	-4.38217	down
Glucose-1-phosphate*	Others	297883	347609	370519	890230	1.06534e+06	1.21785e+06	1.12291	3.12341	1.64312	up
L-Glutamine-O-glycoside	Amino acids and derivatives	950462	809898	1.01198e+06	2.43598e+06	2.3206e+06	3.21358e+06	1.11473	2.87489	1.52351	up
Bergamottin	Lignans and Coumarins	764372	712974	945025	1.70104e+07	1.68022e+07	1.60675e+07	1.14222	20.5914	4.36397	up
4-puinazolinone	Alkaloids	151555	142574	141506	54287.9	67586.2	61633.7	1.13043	0.421242	-1.24728	down
Dihydroxybalfourodine	Alkaloids	3.94885e+06	3.91677e+06	3.43037e+06	1.13606e+06	1.0689e+06	894669	1.13449	0.274401	-1.86564	down
5-O-Methylvisamminol	Others	2.53208e+07	2.44707e+07	2.46897e+07	157399	157808	150097	1.14407	0.00624727	-7.32256	down
Eupatorin; 3',5-Dihydroxy-4',6,7-Trimethoxyflavone*	Flavonoids	1.42355e+07	1.37624e+07	1.37918e+07	5.9214e+06	5.72062e+06	5.77539e+06	1.14349	0.416787	-1.26262	down
5,6,2',3',4',6'-Hexamethoxyflavone	Flavonoids	1.6112e+07	1.47887e+07	1.71029e+07	2.65356e+06	2.86885e+06	2.49983e+06	1.1417	0.167117	-2.58107	down
9,12,13-TriHOME; 9(S),12(S),13(S)-Trihydroxy-10(E)-octadecenoic acid	Lipids	3.30424e+06	3.68538e+06	3.4533e+06	1.1617e+07	1.14224e+07	1.11325e+07	1.14225	3.27225	1.71028	up
3,7-Di-O-methylquercetin	Flavonoids	1.32818e+06	685321	576884	110752	104023	100566	1.1099	0.121735	-3.03818	down
5,7,2'-Trhiyroxy-8-methoxyflavone*	Flavonoids	6.15403e+06	5.7298e+06	5.04037e+06	2.80525e+06	2.4401e+06	2.63946e+06	1.12496	0.465889	-1.10194	down
LysoPC 15:0*	Lipids	171593	109477	130636	1.87475e+06	2.70932e+06	2.15718e+06	1.1359	16.3739	4.03333	up
Quinic Acid	Organic acids	1.17479e+06	1.14293e+06	1.28468e+06	2.44094e+06	2.98225e+06	2.43457e+06	1.12304	2.18125	1.12516	up
3,4,5-Trimethoxycinnamic acid	Phenolic acids	763698	757592	791811	9391.2	6949.6	12574.2	1.14069	0.0125005	-6.32187	down
LysoPE 18:0	Lipids	13824.2	7714.02	5898.21	64716.8	75378.1	26095.8	1.03533	6.05729	2.59867	up
Marmin[7-(6',7'-Dihydroxygeranyloxy)coumarin]	Lignans and Coumarins	7.03291e+06	6.872e+06	7.16216e+06	1.26398e+06	1.21334e+06	1.16528e+06	1.14363	0.172905	-2.53195	down
4-Hydroxysphinganine	Lipids	272310	187076	255732	783815	734509	561804	1.09891	2.90879	1.54042	up
2'-Deoxyinosine-5'-monophosphate	Nucleotides and derivatives	3.16728e+06	3.59715e+06	2.87399e+06	179682	126167	115372	1.13904	0.0437023	-4.51615	down
Tricin (5,7,4'-Trihydroxy-3',5'-dimethoxyflavone)	Flavonoids	100153	90557.5	99548.5	45657.3	39804.9	53805.9	1.10982	0.479806	-1.05948	down
LysoPE 20:2*	Lipids	3470.37	1718.07	3288.56	91844.3	120862	92294.4	1.13385	35.9798	5.16911	up
LysoPC 18:3(2n isomer)*	Lipids	656745	255035	359063	6.47828e+06	8.56504e+06	6.70189e+06	1.12192	17.1108	4.09684	up
9-Hydroxyheterogorgiolide	Terpenoids	1.14653e+07	1.21606e+07	7.58435e+06	129787	118526	84610.4	1.13982	0.0106671	-6.55068	down
LysoPC 19:1	Lipids	20209.7	17344.1	18156.1	1.83046e+06	2.32002e+06	1.75792e+06	1.14312	106.057	6.72869	up
Flindulatin	Flavonoids	1.38842e+07	1.36054e+07	1.43123e+07	2.61122e+06	2.51484e+06	2.24535e+06	1.14243	0.176342	-2.50355	down
4',5'-Dihydropsoralen	Lignans and Coumarins	2.05749e+07	2.00229e+07	1.90901e+07	368640	278383	370278	1.14288	0.0170437	-5.87462	down
4,8-Dihydroxyquinoline-2-carboxylic acid	Organic acids	353992	303599	342101	142593	128084	136206	1.13552	0.407008	-1.29687	down
LysoPC 16:1*	Lipids	29108	39563.1	28561.7	948909	1.33901e+06	1056238	1.14034	34.3932	5.10405	up
Apigenin; 4',5,7-Trihydroxyflavone	Flavonoids	63989.5	37359.1	45861.4	185410	184990	206175	1.11442	3.91668	1.96963	up
Limocitrin (5,7,4'-trihydroxy-8,3'-dimethoxyflavone)	Flavonoids	4.11575e+06	3.72142e+06	4.42202e+06	1.15553e+06	1.17165e+06	1.02747e+06	1.13843	0.273643	-1.86963	down
Riboflavin (Vitamin B2)	Others	1.46711e+06	1.15897e+06	1.70223e+06	631727	625492	657171	1.10161	0.442295	-1.17692	down
2-O-Feruloylglucaric Acid	Phenolic acids	1.78391e+07	1.83997e+07	1.7144e+07	2.15841e+06	2.11324e+06	2.06381e+06	1.14381	0.11868	-3.07485	down
5-O-p-Coumaroylquinic acid*	Phenolic acids	631096	523263	607869	8.65735e+06	8.78565e+06	8.34733e+06	1.14295	14.6351	3.87136	up
Vitexin-2''-O-rhamnoside	Flavonoids	1.3257e+06	712887	1.63099e+06	5.39244e+06	5.0466e+06	4.67722e+06	1.08204	4.11934	2.04241	up
cis-Dehydroosthol	Lignans and Coumarins	1.8409e+06	1.6636e+06	1.68842e+06	236390	225207	175009	1.13923	0.122591	-3.02808	down
Hypolaetin 7,8,3',4'-Tetramethyl Ether	Flavonoids	1.40167e+07	1.23503e+07	1.30256e+07	4.89604e+06	3.92806e+06	4.26675e+06	1.13424	0.332318	-1.58936	down
Dihydrosuberenol	Lignans and Coumarins	8.63119e+06	8.47313e+06	9.91093e+06	456292	473378	397582	1.14279	0.0491297	-4.34726	down
10,16-Dihydroxypalmitic acid	Lipids	54427.9	50305.7	42637.4	10982.7	12186	8953.23	1.13118	0.217966	-2.19782	down
LysoPE 18:2(2n isomer)*	Lipids	548750	193667	314172	6.16419e+06	7.94978e+06	5.57999e+06	1.11904	18.6392	4.22027	up
1,3,7-trihydroxy-6-methoxyxanthen-9-one	Flavonoids	175876	148135	162311	2.60253e+06	2.79658e+06	2.76904e+06	1.14325	16.7957	4.07002	up
Vicenin-3	Flavonoids	197110	153354	229185	581124	716279	667552	1.11859	3.3899	1.76124	up
Aurapten	Lignans and Coumarins	2.30536e+07	2.20856e+07	2.26578e+07	5.42718e+06	5.07081e+06	4.58552e+06	1.14162	0.22248	-2.16825	down
Dendrocrepine*	Alkaloids	332129	249160	400997	899667	1.02566e+06	1.07152e+06	1.10685	3.05089	1.60923	up
3-Hydroxylup-20(29)-en-28-oic acid (Betulinic acid)	Terpenoids	98562.7	92171.7	99014.4	333669	355168	316329	1.14166	3.4691	1.79456	up
L-Histidine	Amino acids and derivatives	8.03346e+06	7.33632e+06	9.36452e+06	1.83863e+07	1.775e+07	16412386	1.11998	2.12452	1.08714	up
Abscisic acid D-glucopyranosyl ester	Others	207541	145005	183322	578998	495637	356569	1.07445	2.67081	1.41728	up
Aromadendrin-7-O-glucoside	Flavonoids	862342	768052	633007	6.49606e+06	6.38364e+06	5.80069e+06	1.1393	8.25324	3.04496	up
Dehydrodiconiferyl alcohol-4-O-glucoside	Lignans and Coumarins	680691	722382	699933	100994	108402	52920.3	1.1186	0.124734	-3.00308	down
6'-Hydroxy-4,2',3',4'-Tetramethoxychalcone	Flavonoids	1.36306e+07	1.44177e+07	1.27215e+07	2.10797e+06	2.1007e+06	2.20142e+06	1.14305	0.157227	-2.66908	down
LysoPC 20:2*	Lipids	16076.9	11694.2	11252.7	561285	761696	522947	1.14013	47.3026	5.56385	up
1-α-Linolenoyl-glycerol*	Lipids	107351	90861.2	117556	394505	413084	518678	1.13007	4.20013	2.07043	up
LysoPC 20:1	Lipids	11370.6	5564.67	8078.28	650055	853397	618428	1.13809	84.8291	6.40649	up
Crepidiaside B	Terpenoids	246059	186565	188325	847124	915628	852985	1.13449	4.21248	2.07467	up
Epigallocatechin	Flavonoids	319197	382262	288803	684943	815789	1.01616e+06	1.09523	2.54164	1.34576	up
Clove chromone	Others	4.60995e+06	5.01772e+06	3.85618e+06	217965	201149	174216	1.14171	0.044003	-4.50626	down
Abscisic acid	Organic acids	1.75171e+06	1.6791e+06	2.06362e+06	753089	911443	702311	1.1131	0.430772	-1.21501	down
Luteolin-3'-O-glucoside*	Flavonoids	1.66574e+06	1.72987e+06	1.70581e+06	7245025	4.38893e+06	4.4961e+06	1.09799	3.16188	1.66078	up
L-Arginine	Amino acids and derivatives	7.10719e+06	2.00884e+06	9.76316e+06	4.11884e+07	4.57937e+07	4.81748e+07	1.0434	7.15904	2.83977	up
5,7-Dimethoxycoumarin (Limettin)(Citropten)	Lignans and Coumarins	7.41302e+06	8.01671e+06	6.96536e+06	267586	326941	253002	1.1424	0.0378444	-4.72378	down
4'-Hydroxy-5,6,7,8-Tetramethoxyflavone	Flavonoids	2.75511e+06	2.55047e+06	2.10655e+06	193104	141083	157710	1.13967	0.066364	-3.91345	down
Isodendrocrepine*	Alkaloids	350546	278586	411581	983546	1.07121e+06	1.19054e+06	1.11743	3.11835	1.64078	up
5,7,8,3',4'-Pentamethoxyflavanone*	Flavonoids	1.02979e+07	1.16221e+07	1.06888e+07	1.2097e+06	1.05199e+06	1.05664e+06	1.14267	0.101762	-3.29674	down
7,8-Dihydrofurocoumarin	Lignans and Coumarins	1.05907e+07	2.41796e+07	2.20108e+07	429064	686625	477355	1.128	0.0280558	-5.15556	down
Homoeriodictyol	Flavonoids	6.30017e+06	4.99402e+06	6.81371e+06	1.86139e+07	1.80165e+07	1.91325e+07	1.12824	3.07948	1.62269	up
LysoPC 18:0	Lipids	177718	122208	129169	1.58515e+06	2.26708e+06	1.06723e+06	1.12076	11.4647	3.51913	up
3-Hydroxyurs-12-en-28-oic acid (Ursolic acid)	Terpenoids	87825.5	71266	184714	308453	339795	333739	1.01864	2.85623	1.51411	up
Natsudaidain (3-Hydroxy-3',4',5,6,7,8-hexamethoxyflavone)	Flavonoids	2.97722e+06	2.78629e+06	2.76458e+06	257851	267071	298122	1.14305	0.0965098	-3.37318	down
(S)-Murpanidin	Lignans and Coumarins	3.86909e+06	3.49282e+06	4.18104e+06	89479.4	92190.8	69866.5	1.14251	0.0217914	-5.5201	down
3',4',5,7-Tetramethoxyflavone; Luteolin Tetramethyl Ether	Flavonoids	8.97238e+06	9.2902e+06	9.09505e+06	1.01645e+06	919226	1.01198e+06	1.14359	0.107745	-3.2143	down
3-Hydroxy-5,7,8-trimethoxyflavone*	Flavonoids	2.64277e+06	2.7473e+06	2.22777e+06	452665	427910	436586	1.14083	0.172905	-2.53195	down
LysoPC 18:0(2n isomer)	Lipids	13915.2	14132.2	7145.79	1.03788e+06	1.32276e+06	1.00796e+06	1.13794	95.7172	6.58071	up
3,4,2',4',6'-Pentahydroxychalcone-4'-O-glucoside	Flavonoids	343249	432689	417697	136515	138825	119908	1.13045	0.331131	-1.59453	down
6-C-Glucosyl-2-Hydroxynaringenin	Flavonoids	564482	676623	688372	4.92914e+06	4.84551e+06	5.37361e+06	1.14144	7.85096	2.97287	up
LysoPC 18:2(2n isomer)	Lipids	1.92613e+06	940156	1.29539e+06	2.5263e+07	3.2774e+07	2.66562e+07	1.13211	20.3507	4.34701	up
LysoPC 20:2(2n isomer)*	Lipids	18568	9064.39	12438.6	523247	697466	533175	1.13602	43.7695	5.45185	up
Eriodictyol-8-C-glucoside	Flavonoids	400497	428853	380654	3.85115e+06	3.06047e+06	3.4082e+06	1.14122	8.52874	3.09233	up
Argininosuccinic acid	Organic acids	45988.9	44986.4	43289.7	200472	191124	194909	1.14353	4.36827	2.12706	up
L-Lysine	Amino acids and derivatives	8.91328e+06	7.28688e+06	9.3875e+06	2.03961e+07	1.86605e+07	1.99107e+07	1.12281	2.30452	1.20447	up
3-O-p-Coumaroylshikimic acid-O-glucoside	Phenolic acids	24600.7	11636	19390.3	186722	214464	192402	1.12461	10.6709	3.41561	up
4'-hydroxy-5,7,3',5'-pentamethoxyfavone*	Flavonoids	1.59274e+07	1.38431e+07	1.49389e+07	624788	580443	578115	1.14365	0.0398875	-4.64792	down
LysoPI 18:3	Lipids	329880	284161	313386	688766	814723	751368	1.13202	2.4313	1.28173	up
Xanthotoxol; 8-Hydroxypsoralen	Lignans and Coumarins	693512	614321	708102	6.35062e+06	7.63458e+06	8.17089e+06	1.14113	10.9905	3.45818	up
4-Methoxy-2,3-dihydrofuro[3,2-g]chromen-7-one	Lignans and Coumarins	2.408e+06	2.24684e+06	2.03498e+06	29562	55585.4	76482	1.13132	0.0241605	-5.3712	down
7-Demethyltangeretin	Flavonoids	806420	870641	844420	35595.4	40134.6	38188.7	1.14364	0.0451793	-4.4682	down
2-α-Linolenoyl-glycerol*	Lipids	93175.9	90493.6	116005	388451	384163	504066	1.12911	4.26022	2.09093	up
LysoPE 18:3(2n isomer)*	Lipids	89713.2	51534.6	69927.6	559381	678863	632583	1.13068	8.85912	3.14716	up
3',5-Dihydroxy-4',6,7-Trimethoxyflavanone	Flavonoids	162515	120222	128178	21544.8	10369.3	18815.7	1.11591	0.123456	-3.01794	down
Quercetin-3-rutinoside-7-galactoside	Flavonoids	47170.5	77948.9	72185.6	240479	315684	190153	1.0895	3.78255	1.91936	up
Salidroside	Phenolic acids	1.36765e+06	1.97525e+06	2.40906e+06	33909.9	32757.7	27917.1	1.13984	0.0164439	-5.92631	down
Uridine	Nucleotides and derivatives	878010	1.16311e+06	1.15059e+06	1.81864e+06	1.74617e+06	2.86427e+06	1.00804	2.01431	1.01029	up
LysoPC 17:1	Lipids	46310.2	18423.5	45722.8	676946	992921	574685	1.11604	20.3207	4.34488	up
Hydroxyicosanoic Acid	Lipids	401189	321811	314614	31567.2	36078.2	23364.8	1.1356	0.0877111	-3.5111	down
3,5,6,7,3',4'-Hexamethoxyflavone	Flavonoids	1.07965e+06	980580	892170	58124.7	64790.3	58345.3	1.14282	0.0613943	-4.02575	down
5-Hydroxy-6,7,3',4',5'-Pentamethoxyflavone	Flavonoids	2.8898e+06	3.13173e+06	3.19957e+06	1.36658e+06	1.36461e+06	1.15216e+06	1.13163	0.421138	-1.24764	down
4'-Hydroxy-5,6,7-trimethoxyflavone	Flavonoids	1.42567e+07	1.28177e+07	1.19901e+07	1.6391e+06	1.49305e+06	1.60802e+06	1.14244	0.121342	-3.04285	down
Xanthotoxin; 8-Methoxypsoralen	Lignans and Coumarins	550755	568033	582014	3.18595e+07	3.21794e+07	2.74759e+07	1.14368	53.8068	5.74972	up
3,4-Dihydroxybenzoic acid (Protocatechuic acid)*	Phenolic acids	6.42848e+06	6.78772e+06	7.38902e+06	2.6275e+06	2.5149e+06	2.57846e+06	1.13985	0.374703	-1.41618	down
LysoPC 15:1	Lipids	31240.3	30465.4	31579.3	346056	603213	457546	1.13621	15.0808	3.91464	up
Hydroxyauranetin 5-O-Glucoside	Flavonoids	325039	344736	384192	107788	104349	94007.3	1.13804	0.290469	-1.78355	down
9,10,13-Trihydroxy-11-Octadecenoic Acid	Lipids	2.67859e+06	1.48155e+06	2.60357e+06	8.44864e+06	8.51281e+06	5.39213e+06	1.05995	3.30492	1.72462	up
Diosmetin (5,7,3'-Trihydroxy-4'-methoxyflavone)*	Flavonoids	5.77764e+06	5.78894e+06	5.18281e+06	2.58449e+06	2.37541e+06	2.65842e+06	1.13514	0.454842	-1.13656	down
Dihydrobungeanool	Alkaloids	100986	110753	98376.1	224782	189488	212281	1.12665	2.02038	1.01463	up
Esculetin-7-O-glucoside*	Lignans and Coumarins	886077	999389	1.40708e+06	5.21444e+06	4.98621e+06	4.60401e+06	1.12432	4.49642	2.16878	up
2,6-Di-tert-butylphenol	Phenolic acids	1.24671e+06	1.06086e+06	1.09744e+06	312282	297440	313025	1.14059	0.270997	-1.88365	down
Eupatilin-7-O-glucoside	Flavonoids	463442	463986	472273	23911.9	29604.4	17072.3	1.13764	0.0504312	-4.30954	down
Dihydromyricetin (Ampelopsin)	Flavonoids	83964.5	85972.3	112223	546426	504409	699789	1.13168	6.20437	2.63329	up
Gallacetophenone	Phenolic acids	222538	134299	146304	50493.4	73374.8	58347.4	1.06953	0.362156	-1.46532	down
Adenosine 5'-monophosphate	Nucleotides and derivatives	27110.4	18663.7	23510.3	63479.5	73131	53983.1	1.103	2.75089	1.4599	up
(E)-Ethyl p-methoxycinnamate	Phenolic acids	1.19735e+06	1.35008e+06	1.38443e+06	7789.71	2598.7	4062.91	1.13708	0.00367544	-8.08787	down
LysoPC 17:0(2n isomer)*	Lipids	67647.2	53227.4	63949.6	2.57001e+06	3.1123e+06	2.54376e+06	1.1426	44.5075	5.47598	up
3,4-Dimethoxycinnamic acid	Phenolic acids	511049	424031	403150	184108	184495	145053	1.11648	0.383832	-1.38145	down
p-Coumaroylmalic acid	Phenolic acids	1.00725e+06	1.01267e+06	1.27811e+06	3.04917e+06	2.64297e+06	2.89662e+06	1.12485	2.60422	1.38085	up
ZP-amide A	Alkaloids	14501.6	11290.9	21870.4	80771.6	86872.9	80925.4	1.11492	5.21516	2.38271	up
6-O-Glucosyl-feruloylbenzoic acid	Phenolic acids	106025	89419.6	83646.6	33768.9	32929.6	42403.8	1.11564	0.39092	-1.35506	down
3',4'-Dihydroxy-5,6,7,8,5'-Pentamethoxyflavone*	Flavonoids	936303	599031	523604	80759.4	72926.2	98917	1.12408	0.122686	-3.02696	down
5,7-Dihydroxy-3,6,8,3',4'-Pentamethoxyflavone*	Flavonoids	936303	599031	523604	80759.4	72926.2	98917	1.12408	0.122686	-3.02696	down
D-Glucose 6-phosphate*	Others	257443	248852	265229	813060	745156	770320	1.14215	3.0181	1.59364	up
1-O-Salicyloyl-β-D-glucose	Phenolic acids	1.45515e+06	2.08444e+06	2.62621e+06	75184.3	70228.3	64240	1.13772	0.0340025	-4.87822	down
Isorhamnetin-3-O-(2''-O-xylosyl)glucoside	Flavonoids	305747	286103	302495	36680	33878.5	16643.3	1.1195	0.0975034	-3.3584	down
Curcurbitacin IIA	Terpenoids	142768	139521	141441	13426.6	14851.5	13474.6	1.14358	0.0985357	-3.34321	down
Oxiglutatione	Amino acids and derivatives	97744.6	88806.2	81550.5	248450	242974	198282	1.12418	2.57256	1.3632	up
xanthoxyletin	Lignans and Coumarins	17103.7	15125.9	18291.9	479024	453082	456402	1.14335	27.4834	4.78049	up
N-Feruloylagmatine	Alkaloids	4.19131e+07	5.08486e+07	4.69145e+07	1.03338e+07	1.24736e+07	1.17727e+07	1.13662	0.247573	-2.01407	down
Limocitrin-3-O-arabinoside	Flavonoids	1.28803e+07	1.21331e+07	2.11842e+07	4.24584e+06	2.91365e+06	3.84058e+06	1.0973	0.238109	-2.07031	down
ulopterol	Lignans and Coumarins	29699.3	36073.5	30708.9	14164.9	16710.4	10866.2	1.08719	0.432636	-1.20877	down
Apigenin-6-C-xyloside-8-C-arabinoside	Flavonoids	81744.5	81628.3	94628.5	25005	27505	16159.3	1.10897	0.266159	-1.90964	down
Isosinensetin	Flavonoids	1.63407e+06	1.80584e+06	1.65536e+06	40170.5	37303.9	35182.5	1.14373	0.0221101	-5.49915	down
Tetrahydrobungeanool	Alkaloids	7353.62	7869.7	7170.16	15338.4	16241.8	15651.5	1.13994	2.10917	1.07667	up
LysoPC 18:3*	Lipids	606312	255331	407990	5.41755e+06	8.45606e+06	6.58303e+06	1.12205	16.1123	4.01009	up
1-O-Feruloyllysine	Alkaloids	4.84459e+06	5.55496e+06	3.62992e+06	1.233e+06	971992	1.11062e+06	1.12202	0.236333	-2.08111	down
LysoPC 17:0*	Lipids	149671	61464.3	104182	1.65563e+06	2.08964e+06	1.31036e+06	1.12031	16.0335	4.00302	up
5,7-Dihydroxy-3',4',5'-trimethoxyflavone	Flavonoids	2.22796e+07	2.31233e+07	2.25795e+07	1.0391e+07	1.0547e+07	9.94214e+06	1.14249	0.454238	-1.13848	down
N-Acetyl-L-tyrosine	Amino acids and derivatives	274446	244217	285060	659284	582116	627865	1.13289	2.32576	1.2177	up
7-Hydroxy-3',4',5,6-tetramethoxyflavone*	Flavonoids	2.41722e+06	1.64698e+06	2.47561e+06	86869.1	80564.5	89903.4	1.14013	0.0393494	-4.66752	down
Kaempferol-3-O-glucoside (Astragalin)*	Flavonoids	892505	1.95234e+06	727505	7775235	9205930	8071905	1.09643	7.01305	2.81004	up
13S-Hydroperoxy-9Z,11E-octadecadienoic acid	Lipids	1.64455e+06	1.69475e+06	1.64923e+06	4.20407e+06	3.92892e+06	4.31718e+06	1.14166	2.49576	1.31948	up
Nobiletin (5,6,7,8,3',4'-Hexamethoxyflavone)*	Flavonoids	5.91676e+06	5.76861e+06	6.3431e+06	1.25644e+06	1.32655e+06	1.18515e+06	1.14236	0.209011	-2.25835	down
Decursinol	Lignans and Coumarins	2.20105e+07	2.40679e+07	1.7775e+07	1.52562e+06	1.55046e+06	1.85589e+06	1.13986	0.077239	-3.69453	down
Cedrelopsin	Lignans and Coumarins	6.99064e+07	7.53851e+07	7.28111e+07	353501	951060	236177	1.1293	0.00706428	-7.14524	down
Demethoxysudachitin	Flavonoids	1.23065e+07	1.09957e+07	1.21867e+07	1.43111e+06	1.54673e+06	1.38237e+06	1.14286	0.122861	-3.0249	down
Esculin (6,7-Dihydroxycoumarin-6-O-glucoside)*	Lignans and Coumarins	1.46929e+06	1.68543e+06	2.6457e+06	1.09215e+07	1.13269e+07	1.18692e+07	1.1222	5.88191	2.55628	up
Dihydrokaempferol-7-O-glucoside	Flavonoids	2.26555e+06	3.48951e+06	3.09698e+06	776659	713727	610519	1.12057	0.237336	-2.075	down
2-Phenylethanol	Phenolic acids	2.0661e+07	1.95875e+07	2.01532e+07	6.76144e+06	6.64528e+06	6.62048e+06	1.14362	0.331567	-1.59263	down
N-benzoyl-2-aminoethyl-β-D-glucopyranoside	Alkaloids	1.63471e+07	1.53786e+07	1.45762e+07	3.40509e+07	3.3839e+07	3.3805e+07	1.14002	2.19634	1.1351	up
Retusin 7-O-Glucoside	Flavonoids	7324820	2.66189e+06	2.48521e+06	410860	391795	837505	1.04909	0.131508	-2.92677	down
Mikanin	Flavonoids	1.5574e+07	1.55297e+07	1.61379e+07	7.67084e+06	6.99805e+06	6.65936e+06	1.13759	0.451472	-1.14729	down
LysoPE 18:2*	Lipids	500959	195449	301173	6.09662e+06	7.5419e+06	5.91663e+06	1.12477	19.6026	4.29297	up
1-O-Feruloyl-β-D-glucose	Phenolic acids	347069	390427	313047	129120	110932	211856	1.03635	0.430166	-1.21703	down
Dimethyl phthalate	Phenolic acids	400663	322149	142469	2.56466e+06	2.24155e+06	1.71636e+06	1.08928	7.53809	2.9142	up
1-O-Gentisoyl-β-D-glucoside	Phenolic acids	1.03885e+07	1.26503e+07	1.24071e+07	151655	549250	103644	1.10938	0.022698	-5.46129	down
Inosine	Nucleotides and derivatives	498511	496210	510131	202037	230707	211815	1.13897	0.428321	-1.22324	down
2'-Deoxyadenosine*	Nucleotides and derivatives	8.90818e+06	6.89734e+06	9.39435e+06	2.43097e+07	2.08628e+07	2.60309e+07	1.11672	2.82554	1.49853	up
8-(2,3-epoxy-1-hydroxy-3-methylbutyl)-7-methoxycoumarin	Lignans and Coumarins	2.30705e+06	2.2857e+06	2.09281e+06	663456	666027	597360	1.14083	0.288209	-1.79481	down
Uridine 5'-monophosphate	Nucleotides and derivatives	44812.1	76760.5	63368.2	390701	284914	244819	1.10722	4.97692	2.31525	up
Eupatorin-5-methylether (3'-hydroxy-5,6,7,4'-tetramethoxyflavone)	Flavonoids	2.2491e+07	2.35445e+07	2.33902e+07	2.10689e+06	2.0731e+06	1.93131e+06	1.14375	0.0880265	-3.50592	down
Pinocembrin-7-O-rutinoside*	Flavonoids	632025	509643	474289	1.08906e+06	1.16906e+06	1.32559e+06	1.10761	2.21771	1.14907	up
6',7'-Dihydroxybergamottin	Lignans and Coumarins	169922	227060	163318	908039	819340	1.02431e+06	1.13101	4.91111	2.29605	up
Isocitric Acid	Organic acids	2.02026e+06	2.23742e+06	2.58083e+06	1.62002e+07	2.11264e+07	1.98318e+07	1.13848	8.3583	3.06321	up
Tricin-4'-O-glucoside	Flavonoids	358528	315558	341307	63938.2	55123.8	54936.4	1.1414	0.171361	-2.54489	down
1-Hydroxypinoresinol-1-O-Glucoside	Lignans and Coumarins	1.27694e+06	1.53646e+06	1.37978e+06	643463	778885	543042	1.09373	0.468711	-1.09323	down
Isorhamnetin-3-O-sophoroside	Flavonoids	2.0344e+06	2.07237e+06	1.81433e+06	786564	717525	637308	1.13242	0.361656	-1.46731	down
LysoPC 18:2	Lipids	2.25079e+06	1.11657e+06	1.63973e+06	2.97007e+07	3.71949e+07	3.13808e+07	1.1327	19.6275	4.2948	up
5-Geranyloxy-1,3-dihydroxyxanthone	Lignans and Coumarins	312694	314498	306966	1.65165e+06	1.63822e+06	1.54366e+06	1.14366	5.17422	2.37134	up
9,12-Octadecadienoic acid,ethyl ester	Others	1.6178e+06	1.76503e+06	1.91189e+06	5.02093e+06	5.23685e+06	2.91819e+06	1.04664	2.48851	1.31528	up
3,3',5,7-Tetrahydroxy-4',6-Dimethoxyflavone; (Laciniatin)*	Flavonoids	8.18158e+06	7.27977e+06	8.85195e+06	3.92324e+06	3.94909e+06	3.78789e+06	1.12998	0.479582	-1.06015	down
5-Acetamidopentanoic Acid	Organic acids	173073	201040	198255	889282	753104	915568	1.13799	4.46907	2.15998	up
1,3-O-Dicaffeoylquinic Acid (Cynarin)	Phenolic acids	406314	318626	382451	156057	146584	140907	1.12755	0.400535	-1.32	down
Phe-Thr	Amino acids and derivatives	904742	672129	770661	1.59212e+06	1.72224e+06	1.81147e+06	1.11289	2.1835	1.12664	up
LysoPC 16:0(2n isomer)	Lipids	3.01275e+06	2.17182e+06	2.50703e+06	2.06392e+07	2.44092e+07	1.99193e+07	1.13768	8.44657	3.07837	up
L-Alanyl-L-Phenylalanine	Amino acids and derivatives	1.84321e+06	1.50299e+06	1.73838e+06	4.99714e+06	4.58705e+06	5.44288e+06	1.13224	2.95542	1.56336	up
Luteolin-6-C-glucoside (Isoorientin)*	Flavonoids	2.7557e+06	2.56276e+06	2.46432e+06	285118	272505	262710	1.14341	0.105404	-3.246	down
LysoPE 16:0(2n isomer)*	Lipids	517373	342366	407239	2.70774e+06	3.7078e+06	2.35816e+06	1.12482	6.9249	2.79179	up
Limocitrin-7-O-glucoside	Flavonoids	6.86784e+06	6.50117e+06	5782685	1.27907e+06	542299	1052505	1.10481	0.150059	-2.7364	down
Sudachitin	Flavonoids	1.00059e+06	1.06116e+06	877704	143678	135960	132173	1.1419	0.140098	-2.83549	down
5,7-Dihydroxy-6,3',4',5'-tetramethoxyflavone (Arteanoflavone)*	Flavonoids	2.99721e+06	2.90159e+06	2.94507e+06	321350	333540	333775	1.14397	0.111791	-3.16113	down
5,7-Dihydroxy-3,4',6,8-tetramethoxyflavone*	Flavonoids	2.99721e+06	2.90159e+06	2.94507e+06	321350	333540	333775	1.14397	0.111791	-3.16113	down
5,4'-Dihydroxy-3,6,7,3'-tetramethoxyflavone*	Flavonoids	2.99721e+06	2.90159e+06	2.94507e+06	321350	333540	333775	1.14397	0.111791	-3.16113	down
Protocatechuic Acid Methyl Ester	Phenolic acids	111708	130620	150234	354737	274907	200295	1.01853	2.11416	1.08009	up
Arginine methyl ester	Amino acids and derivatives	615178	570348	721273	1.422e+06	1.35043e+06	1.4066e+06	1.12592	2.19165	1.13201	up
2'-Deoxyguanosine	Nucleotides and derivatives	1.58549e+06	941822	1.14684e+06	4.77996e+06	4.41396e+06	6.44843e+06	1.1067	4.2574	2.08997	up
Loquatoside	Flavonoids	2.10755e+06	1.92207e+06	2.09035e+06	824255	917982	697182	1.12515	0.3986	-1.32699	down
Myricetin-3-O-rutinoside	Flavonoids	1.58545e+06	2440005	1487505	3.24886e+06	5299675	6.72263e+06	1.01219	2.77005	1.46991	up
3-(1',1'-Dimethylallyl)scopoletin	Lignans and Coumarins	6.54404e+07	7.35855e+07	74924360	1.6471e+06	1.57925e+06	622283	1.13047	0.0179884	-5.79679	down
5'-Methoxyisolariciresinol-9'-O-glucoside	Lignans and Coumarins	855846	947413	806047	67818.7	79052.3	115528	1.13252	0.100563	-3.31383	down
N-(4-Aminobutyl)benzamide	Alkaloids	314913	335813	252025	85398.7	140370	73101.6	1.06984	0.331065	-1.59481	down
Quercetin 3,5,7,3'-tetramethyl ether	Flavonoids	1.3708e+07	1.2043e+07	1.2944e+07	4.8522e+06	4.56335e+06	4.61324e+06	1.14034	0.362548	-1.46376	down
LysoPC 17:2	Lipids	14001.5	4316.64	12462.2	209618	339891	196680	1.10944	24.2424	4.59946	up
Gallic acid-4-O-glucoside	Phenolic acids	367689	506212	484521	28021.4	32068.6	34791.5	1.13946	0.0698469	-3.83966	down
Fagaramide	Alkaloids	1.4861e+06	1.82626e+06	1.45434e+06	672776	590938	558324	1.12403	0.382243	-1.38744	down
L-Malic acid	Organic acids	252100	275022	380652	1.02741e+06	1.26414e+06	1.00791e+06	1.11691	3.63466	1.86182	up
Bismurrangatin	Lignans and Coumarins	90032.9	64201	97860.7	365992	276810	295291	1.11389	3.72119	1.89577	up
3-Hydroxy-palmitic acid methyl ester	Lipids	880086	912893	809951	2.44203e+06	2.28092e+06	1.63547e+06	1.09783	2.44279	1.28853	up
4'-Hydroxy-3,3',5,7,8-Pentamethoxyflavone*	Flavonoids	1.5668e+07	1.65046e+07	1.67426e+07	603091	751954	680267	1.14301	0.041609	-4.58696	down
Limocitrin-3,7-di-O-glucoside	Flavonoids	5.77155e+06	9.23685e+06	8.02127e+06	66927	135416	158374	1.1324	0.0156631	-5.99648	down
Demethylbufotenine O-Glucoside	Alkaloids	3.6542e+06	3.75299e+06	3.90433e+06	1.85997e+07	2.03535e+07	2.10761e+07	1.14274	5.30692	2.40787	up
5-De-O-methyltoddanol	Lignans and Coumarins	2.3913e+06	2.34043e+06	1.88086e+06	153151	152179	104007	1.13767	0.0619027	-4.01385	down
Chrysoeriol-5,7-di-O-glucoside	Flavonoids	236206	167274	152608	34023.9	51519.9	38885.8	1.11189	0.223759	-2.15998	down
24,30-Dihydroxy-12(13)-ene-lupeol	Terpenoids	203875	88957.3	80195.6	1.22276e+06	1.27255e+06	1.02052e+06	1.10715	9.42514	3.23651	up
DL-2-hydroxystearic acid*	Lipids	358930	346396	244881	1.07381e+06	874748	509691	1.00123	2.58707	1.37132	up
Luteolin-6-C-arabinoside-7-O-glucoside	Flavonoids	661056	1.09592e+06	1.00046e+06	252583	249750	171606	1.09972	0.244408	-2.03263	down
Aromatide	Alkaloids	2.10025e+07	1.99488e+07	2.18517e+07	6.32885e+06	5.97084e+06	6.82e+06	1.14065	0.304439	-1.71577	down
2'-Deoxycytidine	Nucleotides and derivatives	947792	585360	842361	2.11042e+06	1.97654e+06	2.56321e+06	1.09077	2.79947	1.48515	up
E,E,Z-1,3,12-Nonadecatriene-5,14-diol	Lipids	3.13763e+06	3.01282e+06	2.07334e+06	2.35323e+07	2.77457e+07	2.31536e+07	1.13463	9.05078	3.17804	up
Eriodictyol (5,7,3',4'-Tetrahydroxyflavanone)	Flavonoids	1.04603e+06	893855	1.36718e+06	219426	247113	233049	1.12842	0.211544	-2.24097	down
Isorhamnetin-3,7-O-diglucoside	Flavonoids	1.29426e+06	1197505	1057505	345564	383628	294453	1.13051	0.28841	-1.79381	down
Octanoic acid	Lipids	78688.5	79453.9	75113.8	18889.2	19255.9	21555.1	1.14161	0.255943	-1.96611	down
6-O-Caffeoylarbutin	Phenolic acids	1.20406e+06	1.24803e+06	1.41488e+06	2.66233e+06	2.44941e+06	2.80716e+06	1.1268	2.04783	1.03409	up
Caffeic aldehyde	Phenolic acids	54740.5	47997.5	55062.8	17009.4	16751.9	26373	1.09112	0.381078	-1.39184	down
Putrescine	Alkaloids	1.41861e+06	1.54747e+06	1.31006e+06	694539	678501	677622	1.13406	0.479559	-1.06022	down
Luteolin-7-O-(6''-malonyl)glucoside	Flavonoids	17042.8	14902.3	19868.8	139065	265291	206024	1.12845	11.7802	3.55829	up
5-Hydroxyauranetin	Flavonoids	4.5101e+06	4.37508e+06	4.60238e+06	1.33735e+06	1.37629e+06	1.27605e+06	1.14303	0.295805	-1.75728	down
Isofraxidin-7-O-glucoside	Lignans and Coumarins	107505	38402.4	92505	1.01242e+06	1.16843e+06	912588	1.11019	12.9751	3.69768	up
Obacunone	Terpenoids	592435	574985	1.11705e+06	2.52562e+06	1.8989e+06	2.79826e+06	1.05698	3.16168	1.66069	up
Justicidin C*	Lignans and Coumarins	2.68539e+06	1.79318e+06	1.71311e+06	125093	119263	132339	1.13792	0.0608388	-4.03886	down
5,4'-Dihydroxy-6,7,8,3'-tetramethoxyflavone	Flavonoids	1.55732e+06	1.57018e+06	1.49512e+06	81431.9	71269.6	70831.2	1.14358	0.0483561	-4.37016	down
D-Glucosamine 1-phosphate	Others	110248	108650	77695.8	188140	219495	205315	1.08567	2.06663	1.04728	up
Methyl palmitate	Lipids	15422	16006.5	16512.3	192608	189608	122751	1.13484	10.5331	3.39686	up
cedrecoumarin B	Lignans and Coumarins	1.02536e+06	904829	940598	17520.3	17332.5	12660.8	1.14243	0.0165507	-5.91696	down
5-Methoxydictamnine	Alkaloids	114844	80079.6	99948.1	25725.7	27973.3	18566.3	1.11477	0.245074	-2.02871	down
JiangxiBaiyingsu I	Terpenoids	129825	177638	135584	1.00412e+06	879164	1.03511e+06	1.13646	6.58709	2.71964	up
Trans-p-hydroxycinnamic acid ethyl ester	Terpenoids	1.26457e+07	1.1783e+07	1.05084e+07	1.11899e+06	903909	993362	1.14165	0.0863342	-3.53392	down
Isochlorogenic acid A*	Phenolic acids	257124	327199	271479	37767.6	21286.5	68195.6	1.08259	0.148691	-2.74961	down
Epipinoresinol	Lignans and Coumarins	97686.6	90829.8	109353	32881.5	30808.4	21665.3	1.11702	0.286552	-1.80313	down
5-Methoxy-8-hydroxypsoralen	Lignans and Coumarins	91153.2	111058	123609	4.7935e+06	4.4893e+06	3.72507e+06	1.1418	39.9235	5.31917	up
Caffeoyl-p-coumaroyltartaric acid	Phenolic acids	1.58497e+07	1.34651e+07	1.57047e+07	1.61647e+06	2.24943e+06	1.00489e+06	1.11945	0.108193	-3.20832	down
Aculeatin	Lignans and Coumarins	2.17646e+07	2.05437e+07	2.2104e+07	136503	106540	107491	1.14357	0.00544204	-7.52164	down
Limocitrin-3-O-(3-hydroxy-3-methylglutarate)glucoside-glucoside	Flavonoids	1.4897e+07	1.36579e+07	1.33523e+07	3.24231e+06	3.06581e+06	3.07147e+06	1.14269	0.223818	-2.1596	down
Oleic acid	Lipids	118054	124023	66206.2	9388.04	9800.6	8326.1	1.1271	0.0892516	-3.48598	down
N-(4-hydroxyphenethyl)cinnamamide	Alkaloids	1.15999e+07	9.94974e+06	1.00242e+07	1.96574e+06	2.1282e+06	1.49967e+06	1.13391	0.17716	-2.49688	down
2',7-Dihydroxy-3',4'-dimethoxyisoflavan	Flavonoids	1.5143e+06	1926277	1.56596e+06	6.48308e+06	5.3462e+06	6.38939e+06	1.1313	3.63898	1.86353	up
3-[(1-Carboxyvinyl)oxy]benzoic acid	Phenolic acids	214049	197882	182138	23104.4	33003.3	45528.6	1.11627	0.171085	-2.54722	down
Persicogenin (5,3'-dihydroxy-7,4'-dimethoxyflavanone)	Flavonoids	118877	130647	119245	692628	663716	684170	1.14324	5.53331	2.46814	up
Vomifoliol	Terpenoids	1.217e+06	1.213e+06	2.10272e+06	326489	312622	325050	1.11196	0.212711	-2.23303	down
Cnidioside A	Lignans and Coumarins	926061	764344	856078	1.54508e+07	1.47232e+07	1.6713e+07	1.14286	18.4124	4.20261	up
1-(4-Methoxyphenyl)allyl acetate	Phenolic acids	212019	222492	179494	9	9	9	1.144	4.39737e-05	-14.473	down
3-Methylxanthine	Nucleotides and derivatives	63643.3	65628.3	53308.5	189380	132483	147463	1.10556	2.57052	1.36206	up
Tricin-7-O-(6''-O-malonyl)glucoside	Flavonoids	4.76061e+06	4.65139e+06	4.47514e+06	781291	552211	733699	1.13703	0.148857	-2.748	down
N-Acetyl-L-threonine	Amino acids and derivatives	75337.6	77973.9	85076.4	203101	165588	158198	1.11814	2.21021	1.14418	up
Epoxybergamottin	Lignans and Coumarins	7.88191e+06	7.05013e+06	9.22658e+06	2.67071e+07	2.44154e+07	2.75491e+07	1.13211	3.25646	1.7033	up
Dihydroxy-dimethoxyflavone-7-O-glucoside*	Flavonoids	1.70428e+06	1.764e+06	1.78897e+06	409097	391053	281475	1.1317	0.205739	-2.28111	down
(S)-Columbianetin	Lignans and Coumarins	1.46932e+06	1.48902e+06	975231	3752.81	20036.5	15708.6	1.11576	0.0100412	-6.63792	down
5-methoxyseselin	Lignans and Coumarins	79191.4	56758.5	52468	348040	462816	332759	1.12598	6.06957	2.60159	up
Nicotinate D-ribonucleoside	Others	845079	959827	896645	380679	403274	356850	1.13606	0.422277	-1.24374	down
Kaempferol (3,5,7,4'-Tetrahydroxyflavone)	Flavonoids	14487.6	14427.7	13229.2	111128	77959.2	74718.9	1.13248	6.25957	2.64606	up
Chrysoeriol-6-C-glucoside-4'-O-glucoside	Flavonoids	3.33344e+06	3.36397e+06	3.425e+06	1.51347e+06	1.7486e+06	1.46826e+06	1.13247	0.467312	-1.09754	down
Umbelliferone 7-O-Rutinoside	Lignans and Coumarins	2.91046e+07	2.89843e+07	2.83893e+07	2.26374e+06	2.51809e+06	2.14033e+06	1.14324	0.080045	-3.64304	down
3-O-Feruloylquinic acid	Phenolic acids	2.69703e+06	2.92222e+06	2.58413e+06	989209	923359	808479	1.13528	0.331698	-1.59206	down
5-O-Caffeoylshikimic acid	Phenolic acids	476679	586939	485118	88467.3	107491	109806	1.136	0.197429	-2.3406	down
8-Isopentenyllimettin	Lignans and Coumarins	2.42842e+06	2.34203e+06	2.09883e+06	224999	188473	173461	1.14127	0.0854432	-3.54889	down
4-Aminobenzoic acid	Phenolic acids	179626	204120	125086	512951	482307	286684	1.01643	2.51938	1.33307	up
Limonin	Terpenoids	6.94801e+06	6.01645e+06	9.21134e+06	3.39268e+06	2.92071e+06	3.4261e+06	1.08533	0.439194	-1.18707	down
3',4',5,6,7-Pentamethoxyflavanone*	Flavonoids	1.09091e+07	1.09757e+07	1.22721e+07	1.15216e+06	1.24289e+06	1.15995e+06	1.14316	0.104079	-3.26425	down
1,5-Dihydroxy-3,4-Dimethoxyacridin-9(10H)-One	Alkaloids	820581	660337	732851	11154.4	12749.6	20182.1	1.13878	0.0199145	-5.65003	down
LysoPC 18:1(2n isomer)	Lipids	350198	349529	393454	950016	1.32218e+06	1.08828e+06	1.12514	3.07404	1.62013	up
N6-Acetyl-L-lysine	Amino acids and derivatives	450138	412158	463247	1.4993e+06	1.27204e+06	1.68892e+06	1.13164	3.36485	1.75054	up
Nomilinic acid	Others	1.46517e+06	1.63071e+06	2.71428e+06	1.02797e+07	8.90716e+06	1.06702e+07	1.11323	5.13877	2.36142	up
Kaempferol-3-O-rutinoside(Nicotiflorin)	Flavonoids	165009	178934	155314	1.91112e+06	1.47956e+06	1.33972e+06	1.13814	9.47487	3.24411	up
1,4,5,6-Tetrahydroxyxanthone	Flavonoids	547522	580341	520182	6704.69	4767.84	3496.55	1.14051	0.00908292	-6.78263	down
Phellopterin	Lignans and Coumarins	125744	173028	228000	1.81471e+07	1.9275e+07	1.85405e+07	1.14105	106.237	6.73114	up
LysoPC 19:0	Lipids	8719.74	12325.2	5214.02	227994	300192	311026	1.13114	31.9591	4.99815	up
α-Ketoglutaric acid	Organic acids	117442	229916	137781	29270.7	31989.1	26677.3	1.10944	0.181262	-2.46385	down
4-O-Methylgallic Acid	Phenolic acids	148217	156934	124144	69116	47411.9	55337.1	1.10147	0.400343	-1.32069	down
Sinensetin (5,6,7,3',4'-pentamethoxyflavone)	Flavonoids	1.34695e+06	1.25609e+06	1.42331e+06	109812	114760	101740	1.14319	0.0810442	-3.62515	down
4-O-Glucosyl-4-hydroxybenzoic acid	Phenolic acids	1.42614e+06	2.14169e+06	2.44948e+06	77208	56813.9	40686.8	1.13331	0.0290343	-5.1061	down
DL-Glyceraldehyde-3-phosphate	Organic acids	7560.13	14211	10758.4	37435.5	21963	26984.8	1.0285	2.65553	1.409	up
Isorhamnetin-3-O-arabinoside	Flavonoids	7.43226e+06	7.59646e+06	8.24683e+06	2.44187e+06	2.47916e+06	1.93551e+06	1.13304	0.294581	-1.76326	down
Pimpinellin	Lignans and Coumarins	2.78888e+06	2.72128e+06	2.89739e+06	474043	509083	392478	1.13972	0.163615	-2.61162	down
6-Hydroxy-5,7,4'-trimethoxyflavone	Flavonoids	3.05918e+07	3.06532e+07	2.89454e+07	4.04634e+06	3.99597e+06	3.53709e+06	1.14294	0.128388	-2.96141	down
2-Hydroxycinnamic acid*	Phenolic acids	1.13544e+07	1.08223e+07	1.17532e+07	2.47626e+07	2.4408e+07	2.69839e+07	1.13867	2.24447	1.16637	up
LysoPC 16:0	Lipids	3.00403e+06	2.23676e+06	2.50801e+06	1.98267e+07	2.57487e+07	19482289	1.13637	8.39584	3.06968	up
2-(7-butoxy-4,8-dimethyl-2-oxochromen-3-yl)acetic acid	Lignans and Coumarins	1.13102e+06	1.47357e+06	1.09448e+06	92168.8	101045	81725.4	1.13975	0.0743267	-3.74998	down
Natsudaidain 3-Glucoside	Flavonoids	1.50186e+06	1.09183e+06	1.22018e+06	450053	486669	524352	1.11815	0.383095	-1.38423	down
2-Isopropylpsoralen	Lignans and Coumarins	107780	138173	128488	4581.59	3582.14	4650.68	1.1416	0.0342227	-4.8689	down
Z-6,7-Epoxyligustilide	Others	158822	171278	147756	17539.1	19291.4	27312.3	1.13301	0.13423	-2.89722	down
5,6,7,3',4',5'-hexamethoxyflavone	Flavonoids	7.15214e+06	6.92528e+06	7.73485e+06	1.56864e+06	1.49473e+06	1.8108e+06	1.13968	0.22346	-2.16191	down
Loliolide	Terpenoids	1.31455e+06	1.28873e+06	1.33915e+06	544530	643118	584102	1.13529	0.449405	-1.15391	down
Salicylic acid	Phenolic acids	290480	293312	230242	82049.6	60971.2	70460.5	1.12734	0.262251	-1.93098	down
Lacinartin	Lignans and Coumarins	3.12611e+07	3.47162e+07	2.735e+07	460373	334690	150550	1.1324	0.0101322	-6.62491	down
Syringetin-3-O-glucoside	Flavonoids	18333020	14949405	19195990	910005	762505	950005	1.14154	0.0499732	-4.3227	down
Trimethyllysine	Amino acids and derivatives	4.4476e+06	3.62971e+06	4.29751e+06	1.22323e+07	1.23e+07	1.28071e+07	1.13635	3.01737	1.59329	up
12,13-DHOME; (9Z)-12,13-Dihydroxyoctadec-9-enoic acid	Lipids	390111	343415	358788	151891	120943	135145	1.13121	0.373501	-1.42082	down
Isopeucenin	Lignans and Coumarins	2.57222e+06	2.71074e+06	2.26512e+06	32443.4	45364	30259.2	1.1417	0.0143171	-6.12612	down
Araneosol 5-[6''-(3-Hydroxy-3-Methylglutaryl)Glucoside]	Flavonoids	370421	363697	345971	53159.4	72131.2	56261.7	1.13744	0.16809	-2.57269	down
Leptene A	Others	1.50408e+06	1.44214e+06	1.36338e+06	25179.6	49316	35894	1.13754	0.0256149	-5.28688	down
N-Feruloylmethylagmatine	Alkaloids	4.8736e+07	4.49937e+07	4.38408e+07	1.49642e+07	1.53748e+07	1.44764e+07	1.14173	0.325763	-1.61811	down
Isoimperatorin	Lignans and Coumarins	506294	567825	710370	2.34383e+07	2.21534e+07	2.37334e+07	1.14235	38.8487	5.27979	up
Kaempferol-3-O-(6''-p-Coumaroyl)glucoside (Tiliroside)	Flavonoids	2.64299e+06	2.63644e+06	2.97466e+06	9.18937e+06	9.91193e+06	8.38984e+06	1.13799	3.33061	1.73579	up
Nomilin	Terpenoids	325482	328822	328819	6.02132e+06	6.26541e+06	6.59171e+06	1.14394	19.2025	4.26322	up
LysoPC 16:2(2n isomer)*	Lipids	2428.24	3107.48	1846.14	105344	124991	105708	1.1402	45.5228	5.50852	up
2,3-Dihydroxanthotoxin	Lignans and Coumarins	1.23476e+07	1.26622e+07	1.37243e+07	142778	96459.8	99546.5	1.14249	0.00874641	-6.83709	down
L-Homomethionine	Amino acids and derivatives	115083	119321	128508	2.18299e+06	1.78535e+06	2.09072e+06	1.14265	16.6957	4.0614	up
Gallocatechin-(4α→8)-catechin	Flavonoids	87644.2	112644	121298	31950.7	40073.2	32598.2	1.1175	0.325331	-1.62002	down
7-Geranyloxy-6-methoxycoumarin	Lignans and Coumarins	1.86273e+07	1.57156e+07	1.33591e+07	3.63483e+06	3.61269e+06	3.00186e+06	1.13158	0.214863	-2.21851	down
9-(Arabinosyl)hypoxanthine	Nucleotides and derivatives	2.29e+06	2.40785e+06	2.02754e+06	840543	747020	865767	1.13386	0.364786	-1.45488	down
Isosakuranetin-7-O-glucoside (Isosakuranin)	Flavonoids	1.16476e+06	806201	944123	2.82454e+06	2.62483e+06	2.88606e+06	1.11989	2.85942	1.51572	up
Feruloylcholine glucoside	Alkaloids	51765.6	51550.2	55430.5	143577	132653	135452	1.1412	2.59333	1.37481	up
5'-Hydroxyauraptene	Lignans and Coumarins	4.62312e+06	4.04612e+06	4.27631e+06	254808	186125	249284	1.14113	0.0533169	-4.22926	down
5'-Demethoxyepiexcelsin	Lignans and Coumarins	13203.2	11479.2	13031	84509.1	89894.9	99133.1	1.1417	7.25305	2.85859	up
8-(3,3-dimethylallyl)-6,7-dimethoxycoumarin	Lignans and Coumarins	408182	426028	373080	51572.7	69838	52262	1.13718	0.143853	-2.79733	down
Syringetin-7-O-glucoside	Flavonoids	5.55024e+06	5.14585e+06	4.89018e+06	478543	861627	864339	1.12135	0.141439	-2.82175	down
Suberosin	Lignans and Coumarins	3.59835e+07	3.39829e+07	3.40623e+07	1.26991e+06	1.23597e+06	1.12177e+06	1.14377	0.0348715	-4.84181	down
Pinoresinol-3,3-dimethylallyl ether	Lignans and Coumarins	37094.5	51985.9	42867.3	16857.2	10693.4	11950.4	1.10288	0.299369	-1.74	down
5,6-Dimethoxy-8-(3'-methyl-2'-oxobutyl)coumarin	Lignans and Coumarins	2.72936e+07	2.76637e+07	2.58421e+07	433236	334366	318004	1.143	0.0134358	-6.21777	down
5-Hydroxy-6,7,3',4'-tetramethoxyflavanone	Flavonoids	899526	965869	950961	156423	162773	172980	1.14305	0.174756	-2.51658	down
Catechin-5-O-glucoside	Flavonoids	70394.9	53137.5	63371.2	247504	207077	190687	1.1254	3.45241	1.7876	up
L-Glutamine	Amino acids and derivatives	9.09736e+06	7.79627e+06	9.56285e+06	2.13053e+07	1.85816e+07	21811934	1.1244	2.33209	1.22162	up
Benzoylmalic acid	Phenolic acids	9.96028e+06	8.41876e+06	9.82041e+06	1.83719e+07	1.73211e+07	2.07339e+07	1.11775	2.00099	1.00072	up
Cirsimaritin (4',5-dihydroxy-6,7-dimethoxyflavone)*	Flavonoids	1.38061e+07	1.32909e+07	1.14118e+07	3.10694e+06	2.8957e+06	3.27448e+06	1.1389	0.240909	-2.05344	down
Kaempferol-3-O-rhamnosyl(1→2)glucoside	Flavonoids	292588	266181	306319	1.98244e+06	1.55368e+06	1.74282e+06	1.13928	6.1022	2.60933	up
2'-Deoxycytidine-5'-monophosphate	Nucleotides and derivatives	2864.91	1382.58	3972.82	58311	78978.7	59344.5	1.12161	23.9205	4.58018	up
Epicatechin glucoside	Flavonoids	5642.39	14408.2	9714.16	197308	155003	120205	1.11785	15.875	3.98869	up
L-Phenylalanyl-L-phenylalanine	Amino acids and derivatives	44715.4	29818.7	48109.3	84455.3	88924.6	84690.6	1.06512	2.10424	1.0733	up
2,3-Dihydroxybenzoic Acid*	Phenolic acids	6.67297e+06	5.76367e+06	6.60839e+06	2.9121e+06	2.90959e+06	2.78921e+06	1.13542	0.452134	-1.14518	down
N-(4-hydroxyphenethyl)-N-methylcinnamamide	Alkaloids	2.07385e+07	1.72408e+07	1.72745e+07	2.91963e+06	3.3804e+06	2.63707e+06	1.13799	0.161747	-2.62819	down
5,6,7,8,3',4'-Hexamethoxyflavanone	Flavonoids	104249	59129.1	43724.4	18173.5	4647.44	13682.7	1.00904	0.176259	-2.50423	down
Peucenin	Lignans and Coumarins	8.40699e+06	7.98032e+06	2.52433e+06	285260	96047.9	92516.9	1.09883	0.0250546	-5.31878	down
Kaempferol-3-O-robinoside-7-O-rhamnoside (Robinin)	Flavonoids	8.28674e+06	9.1182e+06	6.36209e+06	3.64009e+06	3.79874e+06	3.47072e+06	1.09918	0.45902	-1.12337	down
Tachioside	Phenolic acids	48701.4	48383.9	40988.8	17874.2	19303.8	23097.8	1.1154	0.436547	-1.19579	down
Osthole	Lignans and Coumarins	3.59359e+07	3.41088e+07	3.32365e+07	1.22121e+06	1.22181e+06	1.11517e+06	1.14382	0.0344516	-4.85929	down
Skimmianine	Alkaloids	30424.4	33728.4	25816.7	84607.3	105514	67931.2	1.10028	2.86822	1.52016	up
Chlorogenic acid methyl ester	Phenolic acids	528039	423863	438776	81491.2	72830.7	67303.1	1.13903	0.159365	-2.6496	down
Hesperetin-7-O-(6''-malonyl)glucoside	Flavonoids	320221	487285	251029	91602.7	69350.2	108343	1.08102	0.254405	-1.9748	down
N-Feruloylputrescine N-glucoside	Alkaloids	4.00496e+06	4.35922e+06	4.19705e+06	1.13781e+06	1.26333e+06	1.19813e+06	1.14177	0.286538	-1.8032	down
7-O-Prenyl demethylsuberosin	Lignans and Coumarins	1.12836e+06	1.03603e+06	1.07825e+06	306033	308025	270614	1.14095	0.272825	-1.87395	down
Epoxyaurapten	Lignans and Coumarins	471833	462738	591265	114160	91202.7	94156.1	1.13479	0.196298	-2.34888	down
Cinnamoyltyramine	Alkaloids	1.08372e+07	1.00738e+07	1.03894e+07	1.87994e+06	1.9966e+06	1.5453e+06	1.1394	0.17322	-2.52932	down
Calodendrolide(ISO2)	Alkaloids	845118	805905	710019	41552.6	36303.3	36498.6	1.143	0.048434	-4.36784	down
5,7,8-trimethoxycoumarin	Lignans and Coumarins	1.07158e+07	1.30182e+07	8.99455e+06	458746	480912	447697	1.14133	0.0423897	-4.56014	down
Auraptenol	Lignans and Coumarins	7.81889e+06	8.79532e+06	8.19179e+06	192176	142074	130059	1.14201	0.0187176	-5.73946	down
Xanthosine	Nucleotides and derivatives	3.64294e+06	3.55735e+06	3.91468e+06	1.1765e+07	8.67231e+06	1.026e+07	1.12491	2.7618	1.46561	up
Isomeranazin	Lignans and Coumarins	3.47542e+06	3.70237e+06	3.14908e+06	138772	121973	129475	1.14336	0.0377868	-4.72597	down
Luteolin-8-C-glucoside (Orientin)*	Flavonoids	4.44488e+06	4.38761e+06	3.24575e+06	350621	231346	375443	1.13261	0.0792674	-3.65713	down
N-(4-methoxyphenethyl)-N-methylcinnamamide	Alkaloids	1.99507e+07	1.7596e+07	1.95685e+07	1.62459e+06	1.44857e+06	1.4028e+06	1.14295	0.0783673	-3.6736	down
Loganic acid	Terpenoids	51696.1	78136.8	83935.1	15099.7	21975.3	16590.1	1.10291	0.251044	-1.99399	down
Lansiumarin A	Lignans and Coumarins	3.59669e+06	3.4783e+06	4.04177e+06	1.26697e+07	1.22326e+07	1.21356e+07	1.14052	3.33172	1.73627	up
Ferulic acid-4-O-glucoside	Phenolic acids	186383	171343	179995	427366	408030	354798	1.13057	2.21341	1.14627	up
Prosogerin E	Flavonoids	1.21602e+07	1.08832e+07	1.18388e+07	400174	346008	311103	1.14298	0.0303101	-5.04406	down
N-(4'-O-glycosyl)-feruloyl agmatine	Alkaloids	241854	264179	280448	69657.9	95396.8	73339.4	1.12628	0.303115	-1.72206	down
Diosmetin-8-C-(2''-O-arabinosyl)glucoside	Flavonoids	7.05113e+06	6.968e+06	7.56223e+06	2.87395e+06	2.96295e+06	2.63343e+06	1.13918	0.392484	-1.3493	down
N-Monomethyl-L-arginine	Amino acids and derivatives	451674	512079	582264	1.32832e+06	1.24523e+06	1.27954e+06	1.12886	2.49226	1.31746	up
Monohydroxy-trimethoxyflavone-O-(6''-malonyl)glucoside	Flavonoids	1.92417e+06	2.22922e+06	1.75874e+06	681621	726851	719708	1.13267	0.359969	-1.47406	down
moellendorffilin	Lignans and Coumarins	169484	171739	334946	5.25138e+06	7.76588e+06	6.43733e+06	1.13187	28.7718	4.84658	up
Xanthomicrol	Flavonoids	1.21269e+07	1.01308e+07	1.01759e+07	413992	371433	325469	1.14251	0.0342513	-4.8677	down
Hamaudol	Others	2.8117e+06	3.31213e+06	2.53268e+06	7.2607e+06	8.24643e+06	5.52299e+06	1.08918	2.4294	1.2806	up
Heraclenol	Lignans and Coumarins	34030.2	27432	35749.3	2.48135e+06	2.50877e+06	2.91124e+06	1.14299	81.2802	6.34483	up
8-Myrcenyl-7-Methoxycoumarin	Lignans and Coumarins	914470	1.18008e+06	891269	8977.78	12080.7	6488.45	1.1399	0.00922591	-6.76009	down
3,25-Epoxy-3-hydroxyolean-18-en-28-oic acid (Semimoronic acid)	Terpenoids	43555.7	47285.6	50187.7	140787	167053	129756	1.13147	3.10289	1.63361	up
Epicatechin-3'-O-β-D-glucopyranoside	Flavonoids	9282.84	4218.42	6810.1	220848	151060	138664	1.12835	25.1372	4.65175	up
Marmesin O-malonyl glucoside	Lignans and Coumarins	2.93424e+07	3.25615e+07	3.23054e+07	1.17551e+06	1.02001e+06	2699650	1.12183	0.0519606	-4.26644	down
Isosibiricin	Lignans and Coumarins	2642787	2.73824e+06	2.75757e+06	19392.3	13124	10488.2	1.14154	0.00528402	-7.56415	down
LysoPE 16:1(2n isomer)*	Lipids	2233	3238.02	12278.2	118968	142789	119275	1.09241	21.4675	4.42408	up
3'-O-Methyltricetin-7-O-(6''-malonyl)glucoside	Flavonoids	1.40263e+06	1.31965e+06	1.38639e+06	3.93042e+06	3.56083e+06	3.78123e+06	1.14134	2.74359	1.45606	up
Phe-Ile	Amino acids and derivatives	418692	273365	385796	684236	907565	837729	1.07033	2.25405	1.17252	up
Cerrosillin	Flavonoids	469033	506313	488595	47535	38988.5	47244.6	1.14228	0.0913754	-3.45205	down
4-Hydroxy-2-oxoglutaric acid	Organic acids	323247	281000	357290	1.11175e+06	938044	947151	1.13018	3.11683	1.64008	up
3-Aminosalicylic acid	Phenolic acids	946728	1.00704e+06	986456	388095	370182	422293	1.13914	0.401523	-1.31644	down
LysoPC 20:3	Lipids	5222.3	6012.18	4211.3	112181	180963	126691	1.13772	27.1812	4.76454	up
Acacetin-7-O-galactoside	Flavonoids	39613.7	33541.2	27773.2	93093.9	78168.8	108538	1.10338	2.77227	1.47107	up
6,7-dihydroxy-1,3-dimethoxyxanthen-9-one	Flavonoids	1.11845e+06	1.06151e+06	1.35699e+06	276568	240076	235330	1.1365	0.212605	-2.23375	down
Sibiricin	Lignans and Coumarins	403778	364630	365989	5099.76	10005	4462.93	1.13553	0.0172494	-5.85731	down
Isooxypeucedanine	Lignans and Coumarins	15170.2	12284.7	15897.1	662934	708391	781787	1.14281	49.6657	5.63418	up
Dihydromyricetin-3-O-glucoside	Flavonoids	29059.2	20856.2	25800.5	186871	224434	236652	1.137	8.55775	3.09723	up
Ferulic acid methyl ester	Phenolic acids	954646	838680	1.03032e+06	366649	391114	303292	1.12239	0.375776	-1.41206	down
L-Glutamic acid	Amino acids and derivatives	160464	129717	163635	389660	369397	405223	1.1283	2.56553	1.35926	up
Demethylsuberosin	Lignans and Coumarins	1.25623e+06	1.03379e+06	1.06118e+06	1.4711e+07	1.53458e+07	1.50152e+07	1.14277	13.4495	3.74948	up
Dimethyl allyl xanthyletin	Lignans and Coumarins	1.70096e+06	1.40619e+06	1.75658e+06	113724	118100	102670	1.14205	0.0687731	-3.86201	down
Toddalolactone	Lignans and Coumarins	38537.4	38529.3	42979.8	120679	129227	127329	1.14111	3.1424	1.65187	up
N-Feruloylputrescine	Alkaloids	9.7706e+06	9.75358e+06	8.6545e+06	3.50055e+06	3.47361e+06	3.41455e+06	1.14029	0.368673	-1.43959	down
Eicosadienoic acid	Lipids	3.96923e+06	3.698e+06	4.44261e+06	1.12858e+07	1.21721e+07	6.70032e+06	1.0462	2.49039	1.31637	up
Casticin (5,3'-Dihydroxy-3,6,7,4'-Tetramethoxyflavone)	Flavonoids	721839	552564	506314	184800	216100	207454	1.1176	0.341635	-1.54947	down
Methyl linolenate	Lipids	821490	741422	645587	202647	184859	171587	1.13558	0.253156	-1.9819	down
Chrysoeriol-7-O-(6''-malonyl)glucoside	Flavonoids	1.02929e+06	659603	521252	111441	140659	184624	1.09316	0.1976	-2.33935	down
5-Hydroxy-4',6,7-trimethoxyflavone (Salvigenin)	Flavonoids	533934	564365	510800	65435.1	66517.4	58715.4	1.14291	0.118494	-3.07712	down
LysoPC 16:1(2n isomer)*	Lipids	27290	12858.6	101633	631682	1.00471e+06	854059	1.06739	17.5654	4.13466	up
Justicidin A*	Lignans and Coumarins	2.17111e+06	1.65979e+06	1.6704e+06	104861	108051	105185	1.1419	0.0578222	-4.11223	down
N-Monocinnamoylputrescine	Alkaloids	659873	758397	717330	264670	304887	254835	1.13246	0.386023	-1.37324	down
8-(3'-hydroxyisopentyl)-7-methoxycoumarin	Lignans and Coumarins	281147	234967	219644	9732.04	11215.8	8520.58	1.14152	0.0400518	-4.64199	down
Natsudaidain-3-O-(3-hydroxy-3-methylglutarate)glucoside	Flavonoids	2.14292e+07	2.01837e+07	1.78294e+07	9.02767e+06	7.79222e+06	9.32121e+06	1.12454	0.439772	-1.18517	down
Perlolyrine	Alkaloids	77505	44373.1	45278.6	547228	606118	1565005	1.10122	16.2623	4.02346	up
Feruloylsinapoyltartaric acid	Phenolic acids	179138	158640	164332	45241.7	28355.3	37417.7	1.12556	0.221096	-2.17726	down
Kaempferol-4'-O-glucoside*	Flavonoids	1.54727e+06	987505	1.31596e+06	3.80272e+06	8291500	4.52298e+06	1.0696	4.31533	2.10947	up
Limocitrin-7-O-(6''-Acetyl)glucoside	Flavonoids	1.95015e+06	1.74678e+06	1.73653e+06	985018	713242	668321	1.09705	0.435557	-1.19907	down
Glutaric acid*	Organic acids	536772	477192	458086	1.28858e+06	849425	1.22543e+06	1.08137	2.28486	1.19211	up
Sinapoylputrescine	Alkaloids	108490	103032	80378.3	294062	339040	270159	1.12178	3.09441	1.62967	up
Apigenin-6-C-(2''-xylosyl)glucoside	Flavonoids	331730	396911	392932	937687	718894	827131	1.11151	2.21449	1.14697	up
Isorhamnetin-3-O-neohesperidoside*	Flavonoids	3586580	4901985	4627955	12817810	21037260	18144930	1.1086	3.96447	1.98713	up
Cirsilineol 5-[6''-(3-Hydroxy-3-Methylglutaryl)Glucoside]	Flavonoids	3.07003e+07	3.14633e+07	2.94567e+07	1.28096e+06	750651	927168	1.13959	0.0322939	-4.95259	down
Trihydroxycinnamoylquinic acid	Phenolic acids	482477	441001	435895	79144.9	72538.8	73065	1.14291	0.165333	-2.59656	down
3',4'-Dihydroxy-7,5'-dimethoxyflavone	Flavonoids	8.27041e+06	8.0649e+06	6.50161e+06	1.97914e+06	1.76207e+06	1.78789e+06	1.13608	0.242112	-2.04625	down
Naringenin-7-O-Rutinoside-4'-O-glucoside	Flavonoids	6.67194e+06	7.20454e+06	7.28759e+06	2.58228e+06	3.3191e+06	3.47567e+06	1.11343	0.443065	-1.17441	down
Tricin-7-O-saccharic acid	Flavonoids	36833.5	75324.7	68751.2	15644.5	4619.05	10092.5	1.04197	0.167797	-2.57521	down
4,6-Dihydroxyquinoline	Alkaloids	62819	63911.5	63911.5	18403.2	36333.9	28042.6	1.04069	0.434216	-1.20352	down
5,6,7,8-Tetramethoxyflavone	Others	2.76057e+06	2.93056e+06	2.39712e+06	348465	335648	355097	1.14201	0.128484	-2.96034	down
Meranzin hydrate	Lignans and Coumarins	99737.1	139271	129387	5005	20005	2700.6	1.05839	0.0752197	-3.73275	down
Digalloylglucose	Phenolic acids	68933.4	61279.1	92840.1	21567.8	25074	19236.3	1.11237	0.295348	-1.75951	down
Auraptenol diglucoside	Lignans and Coumarins	6.78602e+06	7.20873e+06	7.41513e+06	25005	57222.6	53477.6	1.13776	0.00633844	-7.30166	down
5'-Methoxymatairesinoside	Lignans and Coumarins	258333	201369	262862	41407.8	57740.4	36911.5	1.124	0.188301	-2.40889	down
Columbianetin O-malonyl glucoside	Lignans and Coumarins	3.35452e+07	3.24624e+07	2.8707e+07	1.34573e+06	1.10683e+06	1.03058e+06	1.14238	0.0367751	-4.76513	down
N-(4-methoxyphenethyl)cinnamamide	Alkaloids	1.52854e+06	1.24809e+06	1.51263e+06	143115	117075	110086	1.14023	0.0863264	-3.53405	down
Eriodictyol-7-O-glucoside	Flavonoids	5409775	4115340	7631145	1090005	1005005	795005	1.11518	0.168453	-2.56959	down
4,4'-Dihydroxy-2'-methoxychalcone (3-Deoxysappanchalcone)	Flavonoids	5708.1	5723.59	21535	76238.4	81531	91858.5	1.06264	7.57212	2.9207	up
Citpressine I	Alkaloids	218219	188450	250975	4842.83	6714.83	15595	1.11802	0.0412878	-4.59814	down
3,5,7,3'4'-Pentamethoxyflavone	Flavonoids	1.90117e+06	1.84379e+06	1.89017e+06	149046	158800	137919	1.14347	0.0791046	-3.66009	down
LysoPE 17:1	Lipids	12776.1	6422.2	15862.2	102857	155372	115682	1.11069	10.6648	3.41478	up
5,7,8,4'-Tetramethoxyflavone	Flavonoids	2.4311e+06	2.4521e+06	2.28852e+06	246154	264531	237315	1.14341	0.104299	-3.26121	down
Monohydroxy-trimethoxyflavone*	Flavonoids	1.27885e+06	2.99711e+06	2.52904e+06	425755	470427	473884	1.08269	0.201332	-2.31235	down
7-Methoxy-5-Prenyloxycoumarin	Lignans and Coumarins	7.82505e+06	8.18959e+06	6.91639e+06	130351	112936	145570	1.14302	0.0169576	-5.88192	down
Luteolin-7-O-(2''-O-rhamnosyl)rutinoside	Flavonoids	8.41805e+06	9.41216e+06	9.72962e+06	2.78301e+06	3.48925e+06	2.96239e+06	1.13174	0.335076	-1.57744	down
5,6,7,4'-Tetramethoxyflavone	Flavonoids	2.12513e+06	2.42331e+06	2.09579e+06	290798	262770	276576	1.14253	0.124942	-3.00067	down
Butyl Beta-D-Fructopyranoside	Others	140474	133219	161608	10760.1	8005.54	4712.38	1.12864	0.0539352	-4.21263	down
Zanthoxylumamide E(ISO1)	Alkaloids	102273	118674	107097	14479	13480.4	2505	1.04836	0.0928668	-3.42869	down
Boscialin 4-O-malonyl glucoside	Others	128950	162912	175594	16587.4	41907.9	27505	1.08801	0.183975	-2.44242	down
Pentadecanoic acid,14-methyl-,methyl ester	Others	1.73112e+06	2.05876e+06	2.00573e+06	2.56391e+07	2.31238e+07	1.65185e+07	1.13603	11.2639	3.49364	up
3,5,6,7-Tetramethoxyflavone	Flavonoids	3.19573e+06	3.53129e+06	2.94491e+06	448823	426297	437394	1.14239	0.135703	-2.88147	down
LysoPC 19:2*	Lipids	15793.1	12059.9	16656.2	77331.6	196525	116428	1.10405	8.76861	3.13235	up
Tricin-7-O-(2''-feruloyl)glucoside	Flavonoids	64052	54260.8	70266.6	5520.81	2849.78	4557.89	1.13083	0.0685572	-3.86655	down
6-methyl luteolin	Flavonoids	79693.6	58662.2	57455.1	30532.1	21797.2	36680.1	1.03823	0.454568	-1.13743	down
Koaburaside	Phenolic acids	45631.1	54310.8	49444.8	113094	110697	114142	1.13538	2.26213	1.17768	up
Aucubin	Terpenoids	179713	172412	197853	78297.9	70672.9	63894.7	1.13159	0.387043	-1.36943	down
Yuehgesin	Lignans and Coumarins	117065	130093	132387	7659.55	8342.36	17625	1.11856	0.0885977	-3.49659	down
Isorhamnetin-3-O-(6''-malonyl)glucoside	Flavonoids	1.50232e+06	1.51548e+06	1.38218e+06	3.32098e+06	3.28532e+06	3.47809e+06	1.14026	2.29192	1.19655	up
6-(2,3-Dihydroxy-3-methylbutyl)-7-methoxycoumarin	Lignans and Coumarins	4.88869e+06	5.9342e+06	4.73011e+06	78173.1	78173.1	89004.6	1.14315	0.0157752	-5.9862	down
Toddanin	Lignans and Coumarins	4.88869e+06	5.9342e+06	4.73011e+06	78173.1	78173.1	89004.6	1.14315	0.0157752	-5.9862	down
Dehydrodiconiferyl alcohol-gamma'-O-glucoside	Phenolic acids	621009	682495	685876	149655	91679.2	81311	1.12126	0.162184	-2.6243	down
Eriodictyol-8-C-glucoside-4'-O-glucoside	Flavonoids	46116.2	18878	51696	370387	323445	387176	1.10164	9.26391	3.21162	up
Pseudopelletierine	Alkaloids	257496	210533	209041	1.20062e+06	1.4545e+06	1.6252e+06	1.13585	6.32182	2.66034	up
Fraxetin-8-O-glucoside (Fraxin)	Lignans and Coumarins	74741.7	79218.8	92980.3	18966.1	30223	15257.3	1.09348	0.260979	-1.93799	down
methyl 5-caffeoylquinate	Phenolic acids	1.77142e+06	1.69359e+06	1.67761e+06	614619	594747	437484	1.124	0.320235	-1.6428	down
D-Glucosyl Indole-3-Carboxylate	Alkaloids	277501	350498	309341	47813.7	30857.2	53901.3	1.12524	0.141434	-2.82179	down
4-Methoxyfuro(2,3-b)quinolin-7-ol	Alkaloids	160954	146540	156868	30386.2	29248.3	27696.8	1.14294	0.188067	-2.41068	down
2-Methoxy-1-benzofuran-5-carbaldehyde	Others	7.17037e+06	8.84596e+06	9.38037e+06	2.76614e+06	2.43856e+06	2.53839e+06	1.13121	0.304886	-1.71366	down
2-(Formylamino)benzoic acid	Phenolic acids	1.52178e+06	1.60261e+06	1.56074e+06	3.56029e+06	3.33489e+06	3.75075e+06	1.13942	2.27228	1.18414	up
LysoPE 20:2(2n isomer)*	Lipids	3793.04	2524.7	2109.47	95440.8	125921	82031.4	1.13608	36.0016	5.16999	up
5,6,7,3',4',5'-hexanmethoxyflavone	Flavonoids	144556	123481	133524	9461.22	13670.9	12445.2	1.1385	0.0885973	-3.49659	down
Fraxidin-8-O-glucoside	Lignans and Coumarins	136557	144197	184129	67505	34736.7	45005	1.07594	0.316739	-1.65863	down
7-Hydroxy-4-chromone	Others	6.28787e+06	7.58193e+06	1.10222e+07	2.36777e+06	2.28289e+06	2287505	1.10599	0.278731	-1.84305	down
2',4',6'-Trihydroxyacetophenone	Phenolic acids	46967.8	55653.8	55654.7	120579	135737	88566	1.0754	2.17898	1.12366	up
N-trans-cinnamoylphydroxyphenylethylamine	Alkaloids	1.25901e+07	9.84508e+06	1.05806e+07	1.91723e+06	2.05361e+06	1.52897e+06	1.13486	0.166581	-2.5857	down
L-Aspartyl-L-Phenylalanine	Amino acids and derivatives	395933	397386	359991	924074	868834	920553	1.13957	2.35276	1.23435	up
Haploperoside	Lignans and Coumarins	996278	998395	835090	97360.4	125058	109579	1.13965	0.117323	-3.09144	down
Quercetin-3-O-(2''-O-Rhamnosyl)rutinoside	Flavonoids	120532	327505	88501.4	2300005	2012505	613336	1.01664	9.18079	3.19862	up
5,7,3',4',5'-Pentamethoxyflavanone	Flavonoids	1.68665e+06	1.79566e+06	1.62061e+06	90056.5	73648.2	71382.7	1.14268	0.0460692	-4.44005	down
glyconone	Alkaloids	3.09482e+06	2.56804e+06	3.17043e+06	337236	264212	414144	1.13406	0.114973	-3.12063	down
Kaempferol-3-O-robinobioside(Biorobin)	Flavonoids	617800	625904	612932	6.77905e+06	6.76784e+06	5.62138e+06	1.14244	10.3242	3.36796	up
Apigenin-6-C-(2''-glucuronyl)xyloside	Flavonoids	544716	157505	499759	2.06859e+06	1.9219e+06	1.60906e+06	1.02783	4.6586	2.2199	up
S-(5'-Adenosy)-L-homocysteine	Amino acids and derivatives	193021	179392	188530	69494.6	27997.2	51910.8	1.06762	0.266342	-1.90865	down
5,7-Dihydroxy-1(3H)-isobenzofuranone	Phenolic acids	384336	448755	336035	112191	162653	123344	1.10761	0.340586	-1.55391	down
Kaempferol-3-O-rutinoside-7-O-rhamnoside	Flavonoids	866764	1670005	794726	2.65213e+06	2.73215e+06	2.75121e+06	1.02631	2.44199	1.28806	up
5,6,7,5'-tetramethoxy-3',4'-methylenedioxyflavonoid	Flavonoids	2.70685e+06	2.3794e+06	2.1717e+06	648749	744543	799110	1.13169	0.302069	-1.72705	down
Chrysoeriol-6-C-rhamnoside-7-O-rhamnoside	Flavonoids	58707.7	62816	76765.2	688729	552445	755611	1.1376	10.0701	3.332	up
Methylenesuccinic acid	Organic acids	87811.3	64660.2	56986.4	265411	395117	333923	1.11731	4.74773	2.24724	up
1-O-Vanilloyl-D-Glucose	Phenolic acids	247025	291775	333889	1.40426e+06	1.00264e+06	889187	1.11065	3.77693	1.91721	up
L-Homocitrulline	Amino acids and derivatives	93980.8	83972.8	104917	376641	382849	379169	1.13922	4.02537	2.00912	up
p-Coumaryl alcohol	Phenolic acids	83559.9	86595.2	75999.2	35379.2	30628.2	32195.9	1.13539	0.39895	-1.32572	down
Ptelefoliarine	Alkaloids	2.84702e+06	2.96672e+06	3.09286e+06	333677	255727	388724	1.13705	0.109821	-3.18678	down
Meranzin	Lignans and Coumarins	1.13855e+07	1.03625e+07	11670481	415175	399200	435807	1.14371	0.0374099	-4.74044	down
4-Oxo-9Z,11Z,13E,15E-Octadecatetraenoic Acid	Lipids	1.73517e+06	1.99703e+06	1.5802e+06	17260.3	13025.4	20501.7	1.1418	0.00956017	-6.70875	down
12,13-Dehydrogeranylgeraniol	Terpenoids	252743	237195	310469	5984.26	6369.76	19207.7	1.1151	0.0394321	-4.66449	down
Murpaniculol	Lignans and Coumarins	3.50892e+06	3.93366e+06	3.95752e+06	43718.7	31831.7	61258.2	1.13986	0.0120007	-6.38074	down
N-(4-O-(Glucosyl)-E-feruloyl)-tyramine	Alkaloids	48153.2	55643.2	77043.2	30498.2	21390.9	29428.2	1.04283	0.449666	-1.15308	down
3'-O-Methyltricetin-5-O-glucoside	Flavonoids	5.0277e+06	9.40859e+06	9.74963e+06	407322	540349	242032	1.11934	0.0491899	-4.34549	down
Robinson-7-O-Neohesperidin	Flavonoids	1.036e+06	851760	1.03798e+06	8.41617e+06	9.43106e+06	1.0438e+07	1.14051	9.66772	3.27318	up
1-O-Feruloylquinic acid	Phenolic acids	6.02677e+06	6.05098e+06	12834460	2.79103e+06	2.32891e+06	2.63877e+06	1.03712	0.311442	-1.68296	down
L-Methionine	Amino acids and derivatives	89423.1	99199.8	116838	10812	11527.7	3117.45	1.08686	0.0833403	-3.58484	down
Nodakenin	Lignans and Coumarins	5058825	2.67128e+06	1.79284e+06	1.23371e+07	1.34858e+07	1.45343e+07	1.06269	4.23789	2.08335	up
Skimmin (7-Hydroxycoumarin-7-O-glucoside)	Lignans and Coumarins	1.44782e+07	1.50125e+07	1.24154e+07	4.25601e+06	6.27811e+06	5.30311e+06	1.10739	0.377921	-1.40384	down
3,4',5,6,7-Pentamethoxyflavone	Flavonoids	128656	93936.4	58642.2	2979.23	7483.07	10151.4	1.0883	0.073297	-3.7701	down
Isorhamnetin-3-O-rutinoside-7-O-(2''-O-glucosyl)glucuronate	Flavonoids	51576.7	86309.2	101658	6343.84	7109.89	27506.3	1.01374	0.170992	-2.548	down
Methylmalonic acid	Organic acids	8.13438e+06	4.5842e+06	7.63063e+06	1.16862e+07	1.61043e+07	1.70249e+07	1.00873	2.20232	1.13902	up
Apigenin-8-C-glucoside-7-O-Sophoroside	Flavonoids	329515	303516	222656	1.17604e+06	1.12106e+06	1.02612e+06	1.12516	3.88368	1.95743	up
Bufotenine O-Glucoside	Alkaloids	1.35398e+06	1.33307e+06	1.3395e+06	8.70535e+06	9.96673e+06	9.23267e+06	1.14322	6.93019	2.7929	up
Didymin (Isosakuranetin-7-O-rutinoside)	Flavonoids	1.02398e+07	8.29394e+06	1.09399e+07	2.69012e+07	2.56702e+07	2.77417e+07	1.12749	2.72492	1.44621	up
2-Deoxyribose-1-phosphate	Nucleotides and derivatives	83820	167833	87336.7	416322	379039	231154	1.01828	3.02816	1.59844	up
Pinocembrin-7-O-neohesperidoside*	Flavonoids	431187	468266	501776	1.21035e+06	1.16125e+06	1.03281e+06	1.1321	2.42959	1.28071	up
Eriodictyol-3'-O-glucoside	Flavonoids	2.60211e+06	2.91595e+06	3.35319e+06	638143	1.09562e+06	865612	1.10202	0.293011	-1.77097	down
Isovitexin-2''-O-rhamnoside	Flavonoids	656897	594788	690040	2.15673e+06	2.15744e+06	2.2932e+06	1.14054	3.40284	1.76674	up
Catechin gallate	Flavonoids	67348.3	69431.5	91423.6	184446	160495	192735	1.10748	2.35613	1.23642	up
Chrysoeriol-5-O-glucoside	Flavonoids	1.17921e+06	1.15857e+06	1.33504e+06	94018	77924.7	130866	1.13523	0.0824459	-3.60041	down
Sexangularetin-3-O-glucoside-7-O-rhamnoside	Flavonoids	9	9	9	1.91461e+07	2.09697e+07	1.95208e+07	1.1441	2.20877e+06	21.0748	up
5,6,3',4'-Tetrahydroxy-3,7-dimethoxyflavone-6-O-glucoside	Flavonoids	2.50862e+06	2.96133e+06	2.58424e+06	572505	595005	565005	1.14126	0.215107	-2.21687	down
LysoPE 18:1*	Lipids	50930.1	35090	61720.5	477616	673023	542990	1.13018	11.4635	3.51898	up
LysoPC 16:2*	Lipids	4903.19	3305.94	3927.09	94388.9	138318	91626.8	1.13768	26.7245	4.74009	up
Cis-Aconitic acid	Organic acids	700283	619708	675205	2.29084e+06	3.23574e+06	2.45761e+06	1.12958	4.00171	2.00062	up
Dihydroferuloylputrescine	Alkaloids	9.15096e+06	1.04813e+07	9.42866e+06	3.84602e+06	3.93587e+06	3.1822e+06	1.12943	0.377279	-1.40629	down
Demethylnobiletin 5-O-Glucoside	Flavonoids	2.80836e+07	3.17857e+07	3.12617e+07	1.03557e+07	1.00473e+07	8.44465e+06	1.13469	0.316552	-1.65949	down
N-Acetyl-D-glucosamine	Others	159522	160847	164331	41202.5	36383.4	34860.8	1.14145	0.231992	-2.10785	down
Methylhesperidin	Flavonoids	233859	149793	207746	432204	443504	331914	1.04335	2.04198	1.02997	up
Isovanillin	Phenolic acids	1.19659e+06	1.02803e+06	1.42596e+06	678626	551655	586486	1.08836	0.497665	-1.00675	down
Kaempferol-3-O-(6''-malonyl)galactoside*	Flavonoids	79073.9	56876.3	76411.2	352145	299026	256405	1.12346	4.27374	2.0955	up
Methyl dioxindole-3-acetate	Alkaloids	169037	187085	164123	30713.5	43732.7	42827.5	1.12916	0.22542	-2.14931	down
Clausindine	Lignans and Coumarins	558649	403664	445855	22557.7	21147	25436.3	1.1411	0.0490999	-4.34814	down
Phenylpyruvic acid	Organic acids	189469	146052	142877	345772	361663	384544	1.11494	2.28258	1.19066	up
5,2'-Dihydroxy-7,8-dimethoxyflavone glycoside*	Flavonoids	458562	598699	429477	162855	170843	169134	1.12356	0.338212	-1.564	down
3,5-Diacetyltambulin	Flavonoids	27073.4	23209.2	27751.4	51912.2	59352.7	46823	1.10957	2.02588	1.01855	up
Austroside A	Others	161290	144280	151857	49233.1	58235.9	48738	1.13549	0.34149	-1.55008	down
Citric Acid	Organic acids	3.3131e+06	3.66169e+06	4.27865e+06	3.02362e+07	2.59894e+07	3.87127e+07	1.13457	8.43639	3.07663	up
Dihydroisopelletierine	Alkaloids	1.51506e+07	2.03508e+07	1.76239e+07	3.34063e+07	3.58467e+07	3.85304e+07	1.10617	2.02885	1.02066	up
3-Hydroxy-1,4-dimethoxy-10-methylacridin-9-one	Alkaloids	1.46936e+06	1.07032e+06	1.26798e+06	14730.7	19946.7	24041.6	1.1403	0.0154213	-6.01893	down
3-Indoleacetonitrile	Alkaloids	66964.1	72166.6	67988.6	157654	154930	139753	1.13688	2.18395	1.12694	up
4-MethoxycinnaMaldehyde	Phenolic acids	5.3833e+06	4.89405e+06	4.71094e+06	1.03164e+06	783985	931998	1.13802	0.183318	-2.44758	down
3-Hydroxy-3',4',5,5',7-Pentamethoxyflavone*	Flavonoids	6.58994e+06	4.64463e+06	3.7631e+06	206588	168670	290268	1.13215	0.0443752	-4.4941	down
(2E,6E,8E)-N-(2-hydroxy-2-methylpropyl)-10-oxo-2,6,8-decatrienamide	Alkaloids	71624.6	100620	71290.9	4074.9	22048.4	12867.5	1.0213	0.160103	-2.64293	down
Marmesin O-[6''-(3-Hydroxy-3-Methylglutaryl)Glucoside]	Lignans and Coumarins	4.45751e+06	5.20333e+06	4.53129e+06	128430	112544	93834.7	1.1424	0.0235912	-5.40561	down
Sinapoylcaffeoyltartaric acid	Phenolic acids	22267.5	14749.5	8587.36	99096.4	69028.9	114258	1.08462	6.19201	2.63041	up
Sieboldin	Flavonoids	22796.1	21641.7	27205.1	110251	109287	93752.4	1.13619	4.37293	2.1286	up
Lariciresinol-4'-O-glucoside	Lignans and Coumarins	1.26432e+06	1.18657e+06	1.26623e+06	385255	431755	428545	1.14056	0.335087	-1.57739	down
Limocitrol 3-Glucoside	Flavonoids	1.21382e+06	950646	891374	65005	123749	119923	1.12211	0.101012	-3.3074	down
Tricetin (5,7,3',4',5'-Pentahydroxyflavone)	Flavonoids	63741.5	58904.8	87667	273641	282294	259386	1.12574	3.87669	1.95483	up
Kaempferol-3-O-(2''-O-acetyl)glucuronide	Flavonoids	1.80597e+06	1.53876e+06	1.82673e+06	16554.4	28036.9	29518.7	1.13934	0.0143306	-6.12476	down
2,3-Dihydroxy-3-Methylbutanoic Acid	Organic acids	1.15639e+06	1.59479e+06	1.97624e+06	7.55488e+06	8.28333e+06	1.24599e+07	1.11152	5.98594	2.58158	up
Acacetin-7-O-rutinoside (Linarin)	Flavonoids	1.03567e+06	791287	1.05197e+06	7.15798e+06	8.6203e+06	9.12878e+06	1.13737	8.6515	3.11295	up
Limocitrin-3-O-(hydroxy-methylglutarate)glucoside-glucoside	Flavonoids	1.534e+07	1.11934e+07	1.10455e+07	5228945	4711410	5632870	1.10384	0.414415	-1.27085	down
Tricetin-5-O-(6''-malonyl)glucoside	Flavonoids	465965	493147	490203	1.06477e+06	2.00483e+06	1.53088e+06	1.08764	3.17424	1.66641	up
Murraol	Lignans and Coumarins	27700605	27289510	24838840	632505	310012	817505	1.13156	0.0220474	-5.50325	down
Feruloylmalic acid	Phenolic acids	2.11318e+06	2.07906e+06	2.05306e+06	5.16958e+06	5.37711e+06	5.36819e+06	1.14353	2.54829	1.34953	up
Vitexin-2''-O-xyloside	Flavonoids	276214	399895	370053	810931	832612	891302	1.1078	2.42299	1.27679	up
Citrusal	Lignans and Coumarins	3.64374e+07	3.63417e+07	3.51229e+07	1.67025e+06	4614920	3646090	1.1098	0.0920397	-3.4416	down
Suberenol	Lignans and Coumarins	3.64374e+07	3.63417e+07	3.51229e+07	1.67025e+06	4614920	3646090	1.1098	0.0920397	-3.4416	down
3-Hydroxycinnamic Acid	Phenolic acids	171734	221487	167200	4.75316e+06	6.68216e+06	5.75134e+06	1.1408	30.6674	4.93863	up
4',6-Dihydroxy-5,7-dimethoxyflavanone	Flavonoids	165102	169946	135314	30250.7	36189.1	42543.7	1.12845	0.231701	-2.10966	down
Nicotianamine	Alkaloids	27962.2	29338.3	25657.5	60505.1	86630.3	69671.9	1.11429	2.61346	1.38596	up
D-Fructose 6-phosphate*	Others	330432	333631	427937	989366	1.12726e+06	576330	1.01905	2.46607	1.30222	up
Dihydrokaempferol-3-O-glucoside	Flavonoids	3111445	3124335	4627955	990005	1222505	842505	1.10458	0.281212	-1.83027	down
Gardenin 5-O-Glucoside	Flavonoids	1.61137e+06	959081	970271	462991	475105	429861	1.07081	0.38635	-1.37202	down
1-Aminocyclopropane-1-carboxylic acid	Organic acids	4115.75	7934.84	6468.32	92816.2	103474	103215	1.13322	16.1729	4.01551	up
Luteolin-6-C-(5''-glucuronyl)xyloside	Flavonoids	322334	372721	357500	1.26516e+06	743535	802335	1.0763	2.67068	1.41721	up
5-Hydroxy-2-Carbonylcadinane-12,7-lactone (iso-2)	Terpenoids	203372	177746	218202	62347.1	97283.4	98846.3	1.06952	0.431283	-1.21329	down
Stilbostemin B	Phenolic acids	16807.7	18679.9	20080.4	58683.4	72329.7	64165.4	1.13521	3.51243	1.81247	up
Feruloylcaffeoyltartaric acid	Phenolic acids	75390.3	96274.3	132602	749072	822748	1.0426e+06	1.1269	8.59256	3.10309	up
Marmesin Rutinoside	Lignans and Coumarins	1.00241e+07	6.8969e+06	8.06502e+06	457505	874547	80005	1.04578	0.056514	-4.14525	down
LysoPE 15:1	Lipids	9134.61	11717.5	8363.92	65232.4	81957.8	80954.5	1.13594	7.80889	2.96512	up
Hispidulin-8-C-(2''-O-glucosyl)glucoside	Flavonoids	3.76039e+06	4.07989e+06	4.72032e+06	1.60399e+06	1.45558e+06	1.17595e+06	1.12034	0.337207	-1.56829	down
justicidin B	Lignans and Coumarins	40875.5	46865.3	47999.4	20919.8	18743.4	12934.7	1.09031	0.38749	-1.36777	down
δ-Tridecalactone	Lipids	65069.5	43877.1	19554.4	126841	181302	204996	1.01662	3.99327	1.99757	up
p-Coumaric acid methyl ester	Phenolic acids	211988	182951	168788	382029	367021	389709	1.12278	2.02005	1.01439	up
Isoangenomalin	Lignans and Coumarins	179981	145132	163920	34677.5	26064.3	17598.2	1.11741	0.160194	-2.64211	down
(S)-Peucedanol	Lignans and Coumarins	319932	343373	460634	113982	94548.2	85108.2	1.1198	0.261258	-1.93645	down
Sudachitin 5-[6''-(3-Hydroxy-3-Methylglutaryl)Glucoside]	Flavonoids	1.2378e+06	617008	683144	305208	319548	212296	1.03584	0.329815	-1.60027	down
Apigenin feruloyl xylosyl malonyl glucoside	Flavonoids	10736.8	15005	5012.79	128251	167547	145258	1.11213	14.3411	3.84209	up
Kokusaginine	Alkaloids	10388.4	9956.21	8784.84	32636.6	35009.7	27065.8	1.13039	3.25142	1.70107	up
N-Feruloyl-Cadaverine	Alkaloids	190895	176212	164198	52263.9	74103.2	40505.4	1.0945	0.31408	-1.67079	down
Gallocatechin-(4α→8)-gallocatechin	Flavonoids	38562	97505	44870.5	210227	209667	309080	1.05135	4.02887	2.01038	up
Laricitrin-3-O-glucoside	Flavonoids	2.58025e+06	1.53377e+06	1.51932e+06	398069	172410	310614	1.0893	0.156407	-2.67662	down
3,7-Dihydroxychromen-4-one	Others	102208	93623	121519	36243	27329.2	41929.2	1.10617	0.332445	-1.58881	down
Kaempferol-3-O-(6''-malonyl)glucoside*	Flavonoids	52404.8	97078	64983.7	343986	285994	270731	1.1057	4.19978	2.07031	up
Isomexoticin	Lignans and Coumarins	2.38084e+06	3.01238e+06	2.85768e+06	33819.6	22924.8	19089.2	1.14075	0.00919096	-6.76557	down
Murrayacarpin A glucoside	Lignans and Coumarins	955738	845654	1.00673e+06	251825	211208	147976	1.11923	0.217587	-2.20034	down
3',5,5',7-Tetrahydroxyflavanone-7-O-glucoside	Flavonoids	3286840	2815340	3054745	997505	995005	915005	1.13934	0.317521	-1.65508	down
5'-Deoxy-5'-(methylthio)adenosine	Nucleotides and derivatives	7.28709e+06	6.4926e+06	8.38692e+06	1.49775e+06	2.01008e+06	1.18951e+06	1.11841	0.211911	-2.23847	down
Biotin	Others	178768	131524	110276	21297	30005	14462	1.10451	0.15637	-2.67697	down
Kaempferol-3-O-neohesperidoside-7-O-glucoside*	Flavonoids	348739	313328	285333	2.43636e+06	2.09117e+06	2.11301e+06	1.14051	7.00923	2.80926	up
Apigenin-6,8-di-C-arabinoside*	Flavonoids	100019	76952.9	89803.2	9871.22	5374.3	8884.42	1.12884	0.0904504	-3.46673	down
(S)-Canadine	Alkaloids	17526.7	34123.7	42921.3	108057	168298	116294	1.05898	4.15186	2.05376	up
JiangxiBaiyingsu H	Terpenoids	25140.4	22231.1	15955.2	103368	87606	129610	1.11787	5.06237	2.33981	up
5,4'-Dihydroxy-3,6,7,3'-tetramethoxyflavone-4'-O-glucoside	Flavonoids	5.05124e+06	4.44975e+06	4.10622e+06	636391	655616	767505	1.13961	0.151354	-2.724	down
Phellodensin F	Flavonoids	1.42388e+06	1.19197e+06	1.35913e+06	228602	27505	160229	1.02015	0.104739	-3.25513	down
1-O-Caffeoylglycerol	Phenolic acids	127226	110476	120757	46459.1	33352.2	27319.7	1.10758	0.298865	-1.74243	down
Phloroglucinol-1-O-β-D-glucopyranoside	Phenolic acids	4.1759e+06	7.83898e+06	6.71105e+06	2.88419e+06	2.50799e+06	2.07527e+06	1.03365	0.398776	-1.32635	down
3,6'-Disinapoylsucrose	Phenolic acids	178121	150234	183273	46195.1	42299.9	42785.9	1.13856	0.256595	-1.96244	down
γ-Fagarine	Alkaloids	23930.7	16164.8	19213.7	5574.51	3124.33	3437.18	1.10673	0.204623	-2.28896	down
p-Coumaric acid	Phenolic acids	1.285e+06	2691940	2745915	7383365	6338745	9476095	1.05095	3.45065	1.78687	up
Fraxetin (7,8-Dihydroxy-6-methoxycoumarin)	Lignans and Coumarins	821152	1.01492e+06	2507505	9	9	9	1.1422	6.21608e-06	-17.2956	down
Aromadendrin (Dihydrokaempferol)	Flavonoids	6064.86	1513.02	3270.11	86311.5	97075.2	88290.8	1.11251	25.044	4.6464	up
Vitexin-2''-O-galactoside	Flavonoids	4.9666e+06	4.8647e+06	4.10994e+06	9.90199e+06	1.30651e+07	1.20909e+07	1.11722	2.5147	1.33039	up
3-Prenyl-4-O-glucosyloxy-4-hydroxybenzoic acid	Phenolic acids	115362	227468	260920	6.4002e+06	6.14493e+06	7.11224e+06	1.1324	32.5588	5.02498	up
Monohydroxy-hexamethoxyflavone	Flavonoids	485002	652271	293790	99971.4	104837	91255.6	1.09272	0.206884	-2.27311	down
Mevalonic acid	Organic acids	174398	94647.6	92296.2	278425	311308	423702	1.04007	2.80465	1.48782	up
Chrysoeriol-7-O-(6''-acetyl)glucoside	Flavonoids	1.15168e+06	1.48563e+06	1.95589e+06	692138	373122	269776	1.02812	0.290655	-1.78262	down
Raffinose	Others	315954	337068	178094	109686	85851.1	71348.5	1.05226	0.321117	-1.63883	down
LysoPC 19:2(2n isomer)*	Lipids	9010.27	19838.5	13997.4	58608.7	184003	110141	1.06615	8.233	3.04142	up
Kaempferol-3,7-O-diglucoside	Flavonoids	23702.9	34667.5	33913.6	75993.6	87788.9	54427	1.04796	2.36454	1.24156	up
Quercetin-7-O-(6''-malonyl)glucoside	Flavonoids	106517	92492.2	106135	9	9	9	1.14405	8.84827e-05	-13.4642	down
5,7-Dihydroxy-4-methoxyflavone-3-O-xylose-(1-6)-glucose	Flavonoids	79627.4	157505	70861.4	656722	775924	616559	1.10642	6.6534	2.73409	up
3-Hydroxy-4',5,7-Trimethoxyflavanone	Flavonoids	49464.2	44247.9	55960	9367.31	22257.9	7495.05	1.0366	0.261373	-1.93582	down
Luteolin-4'-O-glucoside*	Flavonoids	1.5221e+06	1.44658e+06	1.5647e+06	3.49932e+06	4.66358e+06	4.6727e+06	1.12401	2.83136	1.50149	up
Gallic acid	Phenolic acids	3.63345e+06	3.82448e+06	3.6205e+06	1.20458e+06	1.10988e+06	508411	1.06826	0.254808	-1.97252	down
Trehalose 6-phosphate	Others	88646.3	82508.4	108588	241092	174134	251287	1.08616	2.3826	1.25253	up
Arg-Gly	Amino acids and derivatives	1.06146e+06	1.23085e+06	1.16191e+06	531226	469599	511674	1.13359	0.43787	-1.19143	down
Limocitrin-3-O-glucoside	Flavonoids	2.08521e+06	1.92518e+06	1.65257e+06	389054	505406	534905	1.12716	0.252406	-1.98618	down
Coumarin	Lignans and Coumarins	1462505	1580005	1295005	1.12476e+07	1.11901e+07	1.22049e+07	1.14195	7.98674	2.99761	up
LysoPE 16:1*	Lipids	6434.51	1611.46	13081.8	93597.8	127690	108955	1.05968	15.6307	3.96631	up
Ferulic acid	Phenolic acids	4.33125e+06	5.98368e+06	4.53772e+06	2.44941e+06	2.24752e+06	1.8799e+06	1.09131	0.442806	-1.17525	down
5,6,3',4'-Tetrahydroxy-3,7-dimethoxyflavone	Flavonoids	162505	70932.8	125005	25005	25005	27505	1.08538	0.216255	-2.2092	down
L-Glycyl-L-proline	Amino acids and derivatives	233348	81935.4	109288	27312.2	33203.6	47701.1	1.00468	0.254885	-1.97208	down
Isovitexin-2''-O-xyloside	Flavonoids	282586	377016	278536	820989	689368	540043	1.06122	2.1856	1.12803	up
1-Methyl-2-[(Z)-6-undecyl]-4(1H)-quinolone	Alkaloids	15153.6	26382.6	16632	70442.2	59427.1	68355.6	1.10015	3.40778	1.76883	up
5-Hydroxy-7,8,2',3'-Tetramethoxyflavone 5-Glucoside	Flavonoids	649429	427223	501133	15190.2	17870.9	19840.7	1.13995	0.0335291	-4.89844	down
Myricetin-3-O-galactoside*	Flavonoids	766384	634944	615574	5538335	5582970	2.13528e+06	1.07529	6.57275	2.7165	up
L-Proline	Amino acids and derivatives	2.11999e+06	2.617e+06	2.14794e+06	714935	784506	1.10335e+06	1.09517	0.378042	-1.40338	down
Aminomalonic acid	Organic acids	282384	233399	314016	1.59685e+06	710311	738507	1.04245	3.67036	1.87592	up
7-Hydroxy-β-carboline-1-propionic acid	Alkaloids	420394	313713	318010	73144.2	108800	112364	1.1066	0.27973	-1.83789	down
N-Feruloylserotonin	Alkaloids	61312.7	75819.7	64244.7	5005	6100.21	6141.18	1.14069	0.0856422	-3.54553	down
Myricetin-3-O-β-D-glucoside*	Flavonoids	628584	1027505	633585	2.59368e+06	2.82615e+06	2.05424e+06	1.09194	3.26425	1.70675	up
Grandisine III	Alkaloids	28270.4	25597.3	32144	2230.49	2672.05	1521.38	1.13359	0.0746866	-3.74301	down
LysoPE 18:1(2n isomer)*	Lipids	53099.9	29864	46766.7	535435	761530	522072	1.12965	14.0216	3.80958	up
Kaempferol-3-O-(2''-O-acetyl)glucoside	Flavonoids	36342	72832.1	45516.7	279562	283733	142771	1.0612	4.56437	2.19041	up
L-Lysine-Butanoic Acid	Amino acids and derivatives	76611	83574.6	85719.1	243315	247403	342186	1.12368	3.3871	1.76005	up
Luteolin-7,3'-di-O-glucoside*	Flavonoids	424742	952505	972505	170005	80526.2	85166.4	1.07161	0.142865	-2.80727	down
Epiafzelechin	Flavonoids	202505	187505	195005	67505	52505	34736.7	1.10046	0.264518	-1.91856	down
Gallocatechin gallate	Flavonoids	105533	92343.9	102278	220983	285683	247889	1.12539	2.51389	1.32992	up
Luteolin-7-O-gentiobioside*	Flavonoids	475838	523199	298924	113077	101758	108952	1.1078	0.249457	-2.00314	down
Murraol glucoside	Lignans and Coumarins	296359	328708	304100	9	9	9	1.14407	2.90583e-05	-15.0707	down
Sideretin (5,7,8-Trihydroxy-6-methoxycoumarin)	Lignans and Coumarins	110593	101575	127630	378241	431381	369991	1.13435	3.47152	1.79557	up
3',5',5,7-Tetrahydroxy-4'-methoxyflavanone-3'-O-glucoside	Flavonoids	401744	654024	591205	2.68131e+06	2.5422e+06	1.64618e+06	1.09576	4.1711	2.06043	up
Hesperetin-6-C-glucoside-7-O-glucoside	Flavonoids	244746	241846	210330	887505	834957	454110	1.06234	3.12313	1.64299	up
Limocitrin-3-O-(3-hydroxy-3-methylglutarate)glucoside	Flavonoids	5.76167e+06	4.91382e+06	5.21972e+06	1.1627e+06	1.3426e+06	1.5204e+06	1.13429	0.253265	-1.98128	down
1-Caffeoyl-6-Erythrosyl-Beta-D-Glucose	Phenolic acids	103900	120129	51434.1	13504.3	8338.66	20574.3	1.06439	0.153985	-2.69914	down
Limocitrin-3-O-galactoside	Flavonoids	2.31279e+06	4.87688e+06	4.59047e+06	267286	738365	425005	1.07798	0.121446	-3.04161	down
S-(Methyl)glutathione	Amino acids and derivatives	40302.9	32059	38465.9	73638.5	117205	62826.2	1.02302	2.28886	1.19463	up
Anthranilic Acid	Phenolic acids	116648	117248	133585	489282	559540	548023	1.14029	4.34539	2.11949	up
6,7-Dihydroxy-4-methylcoumarin	Lignans and Coumarins	2830770	2969745	3651265	450005	148630	227505	1.10727	0.0874058	-3.51613	down
5-Demethylnobiletin	Flavonoids	8.54431e+06	1.13109e+07	6.18454e+06	1.85976e+06	2.80081e+06	1.41983e+06	1.07619	0.233505	-2.09848	down
Limocitrin-3-O-glucoside-di-O-(3-hydroxy-3-methylglutarate)glucoside	Flavonoids	2.51681e+06	9492325	3.63407e+06	359722	381262	364030	1.08981	0.0706387	-3.8234	down
Uracil	Nucleotides and derivatives	21716.6	20344.3	41637.4	72074.5	180834	158421	1.03739	4.91443	2.29703	up
Tricin-7-O-(2''-O-glucosyl)glucoside	Flavonoids	506048	525005	470005	49648.5	32505	50835.1	1.13583	0.0885966	-3.4966	down
Dehydrovomifoliol	Terpenoids	3488315	3581405	2552505	390955	897505	532042	1.09223	0.189198	-2.40203	down
Isorhamnetin-3-O-rutinoside-7-O-rhamnoside*	Flavonoids	281964	552505	707505	2.86671e+06	4766205	6183025	1.08969	8.9599	3.16348	up
Apigenin-6-C-arabinoside-8-C-xyloside*	Flavonoids	98624.8	109797	79580.9	8260.13	2505	10857.4	1.08531	0.0750776	-3.73547	down
Quercetin-3-O-(6''-O-acetyl)glucoside	Flavonoids	68652.4	46984.7	40707.7	268763	112404	157913	1.0236	3.44802	1.78577	up
5-Hydroxy-3,7,4'-trimethoxyflavone	Flavonoids	1.10279e+06	399727	348703	33272	27560.1	29475.9	1.10888	0.0487828	-4.35748	down
5-O-Feruloylquinic acid	Phenolic acids	872068	853019	935054	33447.3	17544.5	24474.4	1.13806	0.0283692	-5.13953	down
Rhamnetin-3-O-Rutinoside-5-O-rhamnoside*	Flavonoids	213971	797505	620005	7431285	6751365	7372720	1.09686	13.2121	3.72379	up
Dillapiol	Others	362521	700002	716603	9	9	9	1.14314	1.5176e-05	-16.0078	down
Tricin-5,7-O-diglucoside	Flavonoids	545005	192047	179982	42505	32811.6	25400.5	1.07291	0.109829	-3.18667	down

## Sheet: Supplementary Table S3.
Supplementary Table S3. Pathway annotation and enrichment analysis of key differential metabolites by KEGG pathway database
Kegg_pathway	ko_ID	Cluster_frequency	Metabolome_frequency	P-value	Corrected_P-value
Biosynthesis of secondary metabolites	ko01110	66 out of 129 51.1627906976744%	145 out of 346 41.9075144508671%	0.00503248	0.397566
Citrate cycle (TCA cycle)	ko00020	5 out of 129 3.87596899224806%	6 out of 346 1.73410404624277%	0.0286731	1
Biosynthesis of various plant secondary metabolites	ko00999	15 out of 129 11.6279069767442%	28 out of 346 8.09248554913295%	0.0506712	1
D-Amino acid metabolism	ko00470	10 out of 129 7.75193798449612%	17 out of 346 4.91329479768786%	0.0540333	1
Lysine degradation	ko00310	6 out of 129 4.65116279069767%	9 out of 346 2.60115606936416%	0.0694519	1
Nucleotide metabolism	ko01232	12 out of 129 9.30232558139535%	23 out of 346 6.64739884393064%	0.0972544	1
Glyoxylate and dicarboxylate metabolism	ko00630	8 out of 129 6.2015503875969%	14 out of 346 4.04624277456647%	0.100693	1
C5-Branched dibasic acid metabolism	ko00660	5 out of 129 3.87596899224806%	8 out of 346 2.3121387283237%	0.131784	1
Biotin metabolism	ko00780	2 out of 129 1.55038759689922%	2 out of 346 0.578034682080925%	0.138326	1
Nitrogen metabolism	ko00910	2 out of 129 1.55038759689922%	2 out of 346 0.578034682080925%	0.138326	1
Taurine and hypotaurine metabolism	ko00430	2 out of 129 1.55038759689922%	2 out of 346 0.578034682080925%	0.138326	1
2-Oxocarboxylic acid metabolism	ko01210	11 out of 129 8.52713178294574%	22 out of 346 6.35838150289017%	0.147778	1
Biosynthesis of amino acids	ko01230	15 out of 129 11.6279069767442%	33 out of 346 9.53757225433526%	0.201853	1
Aminoacyl-tRNA biosynthesis	ko00970	7 out of 129 5.42635658914729%	14 out of 346 4.04624277456647%	0.232274	1
Starch and sucrose metabolism	ko00500	4 out of 129 3.10077519379845%	7 out of 346 2.02312138728324%	0.237126	1
Cysteine and methionine metabolism	ko00270	6 out of 129 4.65116279069767%	12 out of 346 3.46820809248555%	0.262392	1
Cutin, suberine and wax biosynthesis	ko00073	3 out of 129 2.32558139534884%	5 out of 346 1.44508670520231%	0.270425	1
Purine metabolism	ko00230	8 out of 129 6.2015503875969%	17 out of 346 4.91329479768786%	0.271326	1
Alanine, aspartate and glutamate metabolism	ko00250	5 out of 129 3.87596899224806%	10 out of 346 2.89017341040462%	0.298343	1
Arginine biosynthesis	ko00220	5 out of 129 3.87596899224806%	10 out of 346 2.89017341040462%	0.298343	1
Caffeine metabolism	ko00232	2 out of 129 1.55038759689922%	3 out of 346 0.867052023121387%	0.312842	1
Plant hormone signal transduction	ko04075	2 out of 129 1.55038759689922%	3 out of 346 0.867052023121387%	0.312842	1
Pyruvate metabolism	ko00620	2 out of 129 1.55038759689922%	3 out of 346 0.867052023121387%	0.312842	1
Zeatin biosynthesis	ko00908	2 out of 129 1.55038759689922%	3 out of 346 0.867052023121387%	0.312842	1
Pyrimidine metabolism	ko00240	8 out of 129 6.2015503875969%	18 out of 346 5.20231213872832%	0.340929	1
Flavonoid biosynthesis	ko00941	13 out of 129 10.077519379845%	31 out of 346 8.95953757225434%	0.352753	1
Carotenoid biosynthesis	ko00906	1 out of 129 0.775193798449612%	1 out of 346 0.289017341040462%	0.372832	1
Lipoic acid metabolism	ko00785	1 out of 129 0.775193798449612%	1 out of 346 0.289017341040462%	0.372832	1
Sphingolipid metabolism	ko00600	1 out of 129 0.775193798449612%	1 out of 346 0.289017341040462%	0.372832	1
Terpenoid backbone biosynthesis	ko00900	1 out of 129 0.775193798449612%	1 out of 346 0.289017341040462%	0.372832	1
ABC transporters	ko02010	17 out of 129 13.1782945736434%	42 out of 346 12.1387283236994%	0.383609	1
Histidine metabolism	ko00340	3 out of 129 2.32558139534884%	6 out of 346 1.73410404624277%	0.39908	1
Biosynthesis of cofactors	ko01240	16 out of 129 12.4031007751938%	41 out of 346 11.849710982659%	0.466273	1
Lysine biosynthesis	ko00300	2 out of 129 1.55038759689922%	4 out of 346 1.15606936416185%	0.477692	1
Stilbenoid, diarylheptanoid and gingerol biosynthesis	ko00945	2 out of 129 1.55038759689922%	4 out of 346 1.15606936416185%	0.477692	1
Linoleic acid metabolism	ko00591	6 out of 129 4.65116279069767%	15 out of 346 4.33526011560694%	0.51134	1
Phenylpropanoid biosynthesis	ko00940	6 out of 129 4.65116279069767%	15 out of 346 4.33526011560694%	0.51134	1
Glutathione metabolism	ko00480	3 out of 129 2.32558139534884%	7 out of 346 2.02312138728324%	0.520546	1
Biosynthesis of various alkaloids	ko00996	4 out of 129 3.10077519379845%	10 out of 346 2.89017341040462%	0.548909	1
Carbon metabolism	ko01200	6 out of 129 4.65116279069767%	16 out of 346 4.6242774566474%	0.5891	1
Folate biosynthesis	ko00790	1 out of 129 0.775193798449612%	2 out of 346 0.578034682080925%	0.607339	1
Isoflavonoid biosynthesis	ko00943	1 out of 129 0.775193798449612%	2 out of 346 0.578034682080925%	0.607339	1
Monoterpenoid biosynthesis	ko00902	1 out of 129 0.775193798449612%	2 out of 346 0.578034682080925%	0.607339	1
Porphyrin metabolism	ko00860	1 out of 129 0.775193798449612%	2 out of 346 0.578034682080925%	0.607339	1
Propanoate metabolism	ko00640	1 out of 129 0.775193798449612%	2 out of 346 0.578034682080925%	0.607339	1
Riboflavin metabolism	ko00740	1 out of 129 0.775193798449612%	2 out of 346 0.578034682080925%	0.607339	1
Butanoate metabolism	ko00650	2 out of 129 1.55038759689922%	5 out of 346 1.44508670520231%	0.615869	1
Ubiquinone and other terpenoid-quinone biosynthesis	ko00130	2 out of 129 1.55038759689922%	5 out of 346 1.44508670520231%	0.615869	1
Tropane, piperidine and pyridine alkaloid biosynthesis	ko00960	4 out of 129 3.10077519379845%	11 out of 346 3.17919075144509%	0.638822	1
Metabolic pathways	ko01100	86 out of 129 66.6666666666667%	235 out of 346 67.9190751445087%	0.693722	1
Phenylalanine, tyrosine and tryptophan biosynthesis	ko00400	3 out of 129 2.32558139534884%	9 out of 346 2.60115606936416%	0.716748	1
Phenylalanine metabolism	ko00360	5 out of 129 3.87596899224806%	15 out of 346 4.33526011560694%	0.71891	1
Arginine and proline metabolism	ko00330	6 out of 129 4.65116279069767%	18 out of 346 5.20231213872832%	0.722982	1
Tryptophan metabolism	ko00380	6 out of 129 4.65116279069767%	18 out of 346 5.20231213872832%	0.722982	1
Carbon fixation in photosynthetic organisms	ko00710	2 out of 129 1.55038759689922%	6 out of 346 1.73410404624277%	0.724264	1
Isoquinoline alkaloid biosynthesis	ko00950	2 out of 129 1.55038759689922%	6 out of 346 1.73410404624277%	0.724264	1
Valine, leucine and isoleucine biosynthesis	ko00290	2 out of 129 1.55038759689922%	6 out of 346 1.73410404624277%	0.724264	1
Fatty acid degradation	ko00071	1 out of 129 0.775193798449612%	3 out of 346 0.867052023121387%	0.754587	1
Glycerolipid metabolism	ko00561	1 out of 129 0.775193798449612%	3 out of 346 0.867052023121387%	0.754587	1
Inositol phosphate metabolism	ko00562	1 out of 129 0.775193798449612%	3 out of 346 0.867052023121387%	0.754587	1
Monobactam biosynthesis	ko00261	1 out of 129 0.775193798449612%	3 out of 346 0.867052023121387%	0.754587	1
Flavone and flavonol biosynthesis	ko00944	7 out of 129 5.42635658914729%	22 out of 346 6.35838150289017%	0.778556	1
Amino sugar and nucleotide sugar metabolism	ko00520	3 out of 129 2.32558139534884%	10 out of 346 2.89017341040462%	0.788679	1
Biosynthesis of nucleotide sugars	ko01250	3 out of 129 2.32558139534884%	10 out of 346 2.89017341040462%	0.788679	1
Glycolysis / Gluconeogenesis	ko00010	1 out of 129 0.775193798449612%	4 out of 346 1.15606936416185%	0.846885	1
Fatty acid biosynthesis	ko00061	2 out of 129 1.55038759689922%	8 out of 346 2.3121387283237%	0.865204	1
Glucosinolate biosynthesis	ko00966	2 out of 129 1.55038759689922%	8 out of 346 2.3121387283237%	0.865204	1
Pentose and glucuronate interconversions	ko00040	2 out of 129 1.55038759689922%	8 out of 346 2.3121387283237%	0.865204	1
Valine, leucine and isoleucine degradation	ko00280	1 out of 129 0.775193798449612%	5 out of 346 1.44508670520231%	0.904639	1
Vitamin B6 metabolism	ko00750	1 out of 129 0.775193798449612%	5 out of 346 1.44508670520231%	0.904639	1
beta-Alanine metabolism	ko00410	2 out of 129 1.55038759689922%	9 out of 346 2.60115606936416%	0.90762	1
Galactose metabolism	ko00052	3 out of 129 2.32558139534884%	13 out of 346 3.75722543352601%	0.919748	1
Ascorbate and aldarate metabolism	ko00053	2 out of 129 1.55038759689922%	10 out of 346 2.89017341040462%	0.937355	1
Biosynthesis of unsaturated fatty acids	ko01040	2 out of 129 1.55038759689922%	10 out of 346 2.89017341040462%	0.937355	1
Tyrosine metabolism	ko00350	2 out of 129 1.55038759689922%	11 out of 346 3.17919075144509%	0.957906	1
Nicotinate and nicotinamide metabolism	ko00760	1 out of 129 0.775193798449612%	7 out of 346 2.02312138728324%	0.963208	1
Pantothenate and CoA biosynthesis	ko00770	1 out of 129 0.775193798449612%	8 out of 346 2.3121387283237%	0.977208	1
Pentose phosphate pathway	ko00030	1 out of 129 0.775193798449612%	8 out of 346 2.3121387283237%	0.977208	1
alpha-Linolenic acid metabolism	ko00592	1 out of 129 0.775193798449612%	12 out of 346 3.46820809248555%	0.996705	1

## Sheet: Supplementary Table S4.
Supplementary Table S4. A list of significant pathways
Kegg_pathway	ko_ID	Sig_compound	compound	Sig_compound_all	compound_all	IndexList	CIDList	Pathway
Metabolic pathways	ko01100	86	235	129	346	Lmbn005662;MWSslk132;mws0620;Lmbn000198;mws0425;mws0458;Lmbn002648;mws0609;pmb3101;mws1090;mws0277;pmb2221;MWS20151;mws0232;mws0254;Lmtn004049;MWSmce119;pmb2657;pme0026;Ymjm000148;mws0248;mws0183;pmb0981;mws0866;mws4134;pmb0496;pmb2804;pme1119;pme3961;pme3188;Zmyn000453;Lmbn001467;pme1184;mws0275;pme1194;mws0064;Lmyn008503;pme2292;Zmyn000110;MA10107783;pme1266;pma3101;mws1068;Hmln002806;mws1336;p…	C14825+C19615+C06213+C03064+C02226+C00755+C02763+C00942+C02504+C00103+C00296+C12144+C01477+C00255+C00135+C06082+C00062+C03406+C00047+C06046+C00299+C00230+C00020+C00092+C00127+C18325+C04717+C00294+C00559+C00105+C00311+C03087+C00330+C00149+C00881+C05631+C06423+C00134+C06156+C20772+C16357+C05841+C05903+C10434+C00568+C02727+C00026+C01772+C00805+C03793+C00064+C00239+C01762+C01127+C00025+C10497+C00489+…	https:\\www.genome.jp\dbget-bin\www_bget?map01100
Biosynthesis of secondary metabolites	ko01110	66	145	129	346	mws1002;MWSmce200;mws0458;Zmyn004449;pmb3101;mws1090;MWSmce310;mws0917;MWS20151;mws0232;pmb3074;mws0254;mws0042;Lmtn004049;MWSmce119;Lmsn003297;pmb2657;pme0026;mws1070;mws1579;mws0183;mws0744;pmb0981;mws0866;MWSHY0136;Zmyn000453;mws0275;mws0064;pmb0142;pme2292;MA10107783;pme1266;Zaqp006280;mws1068;Hmln002806;Lmsn002815;pme2380;Lmmn001643;Lmgn001670;Lmbp000123;mws0639;mws0668;Zmcp002507;pme0014;MW…	C11620+C00758+C00755+C21923+C02504+C00103+C22152+C01265+C01477+C00255+C12208+C00135+C12136+C06082+C00062+C16408+C03406+C00047+C00841+C01864+C00230+C02906+C00020+C00092+C12249+C00311+C00149+C05631+C10945+C00134+C20772+C16357+C19707+C05903+C10434+C21833+C00026+C01772+C00805+C17213+C00196+C01762+C01512+C00025+C18083+C10865+C02646+C00073+C00417+C00166+C00158+C05324+C00085+C01234+C03329+C00811+C09265+…	https:\\www.genome.jp\dbget-bin\www_bget?map01110
ABC transporters	ko02010	17	42	129	346	mws0232;mws0254;MWSmce119;pme0026;mws0248;pme1119;pme3961;pme1184;pme1194;pme2292;pme0193;mws0668;pme0014;pme2755;pme2266;pme2125;pme0006	C00255+C00135+C00062+C00047+C00299+C00294+C00559+C00330+C00881+C00134+C00064+C01762+C00025+C00140+C00120+C00492+C00148	https:\\www.genome.jp\dbget-bin\www_bget?map02010
Biosynthesis of cofactors	ko01240	16	41	129	346	mws1090;mws0232;pmb0981;mws4134;pme3188;Zmyn000453;Lmyn008503;MA10107783;mws1336;pme2380;pme0193;pme0014;pme1286;pme1210;mws0281;pme2266	C00103+C00255+C00020+C00127+C00105+C00311+C06423+C20772+C00568+C00026+C00064+C00025+C00021+C00073+C00158+C00120	https:\\www.genome.jp\dbget-bin\www_bget?map01240
Biosynthesis of various plant secondary metabolites	ko00999	15	28	129	346	MWSmce200;MWSmce310;mws1070;mws1579;Hmhp008730;Wagp011647;Zaqp006280;Lmmn001643;MWSmce160;pme1210;mws1375;mws1014;mws0024;HX1365;Zmln002252	C00758+C22152+C00841+C01864+C22156+C22153+C19707+C01772+C18083+C00073+C05324+C09265+C01424+C05851+C22007	https:\\www.genome.jp\dbget-bin\www_bget?map00999
Biosynthesis of amino acids	ko01230	15	33	129	346	pmb3101;mws0254;MWSmce119;pmb2657;pme0026;Zmyn000453;pme2380;pme0193;pme0014;pme1286;pme1210;mws0159;mws0281;pme0006;mws1078	C02504+C00135+C00062+C03406+C00047+C00311+C00026+C00064+C00025+C00021+C00073+C00166+C00158+C00148+C00108	https:\\www.genome.jp\dbget-bin\www_bget?map01230
Flavonoid biosynthesis	ko00941	13	31	129	346	mws0463;MWS20151;pmb3074;mws0042;mws1033;Lmsn003297;mws0744;mws0064;mws1068;Hmln002806;mws0920;MWSHY0163;mws1422	C01709+C01477+C12208+C12136+C09756+C16408+C02906+C05631+C05903+C10434+C10192+C00974+C12128	https:\\www.genome.jp\dbget-bin\www_bget?map00941
Nucleotide metabolism	ko01232	12	23	129	346	pmc0066;mws0248;pmb0981;pme1119;pme3961;pme3188;pme1184;pme1194;pme0193;pme1373;mws0668;pme0257	C06196+C00299+C00020+C00294+C00559+C00105+C00330+C00881+C00064+C00239+C01762+C00106	https:\\www.genome.jp\dbget-bin\www_bget?map01232
2-Oxocarboxylic acid metabolism	ko01210	11	22	129	346	mws0425;pmb3101;pme0026;Zmyn000453;pme2380;Lmbp000123;pme0014;pme1210;pme2550;mws0159;mws0281	C02226+C02504+C00047+C00311+C00026+C17213+C00025+C00073+C00417+C00166+C00158	https:\\www.genome.jp\dbget-bin\www_bget?map01210
D-Amino acid metabolism	ko00470	10	17	129	346	mws0254;MWSmce119;pme0026;pme2292;pme2380;pme0193;pme0014;pme1210;mws0159;pme0006	C00135+C00062+C00047+C00134+C00026+C00064+C00025+C00073+C00166+C00148	https:\\www.genome.jp\dbget-bin\www_bget?map00470
Purine metabolism	ko00230	8	17	129	346	mws0609;pmc0066;pmb0981;pme1119;pme3961;pme1184;pme0193;mws0668	C00942+C06196+C00020+C00294+C00559+C00330+C00064+C01762	https:\\www.genome.jp\dbget-bin\www_bget?map00230
Pyrimidine metabolism	ko00240	8	18	129	346	mws0248;pme3188;pme1194;pme0193;pme1373;mws0470;pmb2507;pme0257	C00299+C00105+C00881+C00064+C00239+C02170+C00672+C00106	https:\\www.genome.jp\dbget-bin\www_bget?map00240
Glyoxylate and dicarboxylate metabolism	ko00630	8	14	129	346	Zmyn000453;mws0275;pme2380;pme0193;pme2761;pme0014;pme2550;mws0281	C00311+C00149+C00026+C00064+C01127+C00025+C00417+C00158	https:\\www.genome.jp\dbget-bin\www_bget?map00630
Flavone and flavonol biosynthesis	ko00944	7	22	129	346	mws1002;mws0917;MWS20151;pme3227;MWSHY0136;mws1068;Lmsn002815	C11620+C01265+C01477+C12628+C12249+C05903+C21833	https:\\www.genome.jp\dbget-bin\www_bget?map00944
Aminoacyl-tRNA biosynthesis	ko00970	7	14	129	346	mws0254;MWSmce119;pme0026;pme0193;pme0014;pme1210;pme0006	C00135+C00062+C00047+C00064+C00025+C00073+C00148	https:\\www.genome.jp\dbget-bin\www_bget?map00970
Linoleic acid metabolism	ko00591	6	15	129	346	Lmbn005662;Lmbn004240;Lmbn003970;pmn001694;pmb2804;Lmbn005487	C14825+C14837+C14833+C14835+C04717+C14829	https:\\www.genome.jp\dbget-bin\www_bget?map00591
Tryptophan metabolism	ko00380	6	18	129	346	mws0620;Zmtn001464;Lmgp001898;pme3083;pmb0819;mws1078	C06213+C02470+C05639+C05653+C02938+C00108	https:\\www.genome.jp\dbget-bin\www_bget?map00380
Cysteine and methionine metabolism	ko00270	6	12	129	346	pme2890;pme1286;pme1210;mws1375;mws4052;pme1474	C01817+C00021+C00073+C05324+C01234+C00170	https:\\www.genome.jp\dbget-bin\www_bget?map00270
Phenylpropanoid biosynthesis	ko00940	6	15	129	346	pmb3074;pmb0142;Hmln002806;mws0921;pme1439;mws0014	C12208+C10945+C10434+C02646+C00811+C01494	https:\\www.genome.jp\dbget-bin\www_bget?map00940
Arginine and proline metabolism	ko00330	6	18	129	346	MWSmce119;pmb0496;pme2292;pme0014;Lmlp003161;pme0006	C00062+C18325+C00134+C00025+C10497+C00148	https:\\www.genome.jp\dbget-bin\www_bget?map00330
Lysine degradation	ko00310	6	9	129	346	pme0026;Lmbn001467;pme0122;pme2380;Zmzp000145;pme0243	C00047+C03087+C02727+C00026+C03793+C00489	https:\\www.genome.jp\dbget-bin\www_bget?map00310
Carbon metabolism	ko01200	6	16	129	346	Zmyn000453;mws0275;pme2380;pme0014;mws0281;pme3313	C00311+C00149+C00026+C00025+C00158+C00085	https:\\www.genome.jp\dbget-bin\www_bget?map01200
C5-Branched dibasic acid metabolism	ko00660	5	8	129	346	mws0425;pme2380;pme0014;Zmgn000217;pme2550	C02226+C00026+C00025+C00490+C00417	https:\\www.genome.jp\dbget-bin\www_bget?map00660
Phenylalanine metabolism	ko00360	5	15	129	346	Lmbn002648;ML10179289;Lmmn001643;mws0159;Lmbn002739	C02763+C05853+C01772+C00166+C12621	https:\\www.genome.jp\dbget-bin\www_bget?map00360
Arginine biosynthesis	ko00220	5	10	129	346	MWSmce119;pmb2657;pme2380;pme0193;pme0014	C00062+C03406+C00026+C00064+C00025	https:\\www.genome.jp\dbget-bin\www_bget?map00220
Alanine, aspartate and glutamate metabolism	ko00250	5	10	129	346	pmb2657;pme2380;pme0193;pme0014;mws0281	C03406+C00026+C00064+C00025+C00158	https:\\www.genome.jp\dbget-bin\www_bget?map00250
Citrate cycle (TCA cycle)	ko00020	5	6	129	346	Zmyn000453;mws0275;pme2380;pme2550;mws0281	C00311+C00149+C00026+C00417+C00158	https:\\www.genome.jp\dbget-bin\www_bget?map00020
Biosynthesis of various alkaloids	ko00996	4	10	129	346	mws0458;Lmgn001670;HX1395;mws1078	C00755+C00805+C10740+C00108	https:\\www.genome.jp\dbget-bin\www_bget?map00996
Starch and sucrose metabolism	ko00500	4	7	129	346	mws1090;mws0866;pme3313;mws2523	C00103+C00092+C00085+C00689	https:\\www.genome.jp\dbget-bin\www_bget?map00500
Tropane, piperidine and pyridine alkaloid biosynthesis	ko00960	4	11	129	346	pme0026;pme2292;Lmsp000648;mws0159	C00047+C00134+C10865+C00166	https:\\www.genome.jp\dbget-bin\www_bget?map00960
Cutin, suberine and wax biosynthesis	ko00073	3	5	129	346	MWSslk132;pmn001686;pmf0395	C19615+C08285+C00712	https:\\www.genome.jp\dbget-bin\www_bget?map00073
Galactose metabolism	ko00052	3	13	129	346	mws1090;pme3313;pme2125	C00103+C00085+C00492	https:\\www.genome.jp\dbget-bin\www_bget?map00052
Amino sugar and nucleotide sugar metabolism	ko00520	3	10	129	346	mws1090;Zmyn000110;pme2755	C00103+C06156+C00140	https:\\www.genome.jp\dbget-bin\www_bget?map00520
Biosynthesis of nucleotide sugars	ko01250	3	10	129	346	mws1090;Zmyn000110;pme2755	C00103+C06156+C00140	https:\\www.genome.jp\dbget-bin\www_bget?map01250
Phenylalanine, tyrosine and tryptophan biosynthesis	ko00400	3	9	129	346	mws0277;mws0159;mws1078	C00296+C00166+C00108	https:\\www.genome.jp\dbget-bin\www_bget?map00400
Histidine metabolism	ko00340	3	6	129	346	mws0254;pme2380;pme0014	C00135+C00026+C00025	https:\\www.genome.jp\dbget-bin\www_bget?map00340
Glutathione metabolism	ko00480	3	7	129	346	mws4134;pme2292;pme0014	C00127+C00134+C00025	https:\\www.genome.jp\dbget-bin\www_bget?map00480
Ascorbate and aldarate metabolism	ko00053	2	10	129	346	Lmbn000198;pme2380	C03064+C00026	https:\\www.genome.jp\dbget-bin\www_bget?map00053
Valine, leucine and isoleucine biosynthesis	ko00290	2	6	129	346	mws0425;pmb3101	C02226+C02504	https:\\www.genome.jp\dbget-bin\www_bget?map00290
Pyruvate metabolism	ko00620	2	3	129	346	pmb3101;mws0275	C02504+C00149	https:\\www.genome.jp\dbget-bin\www_bget?map00620
Pentose and glucuronate interconversions	ko00040	2	8	129	346	mws1090;pme2380	C00103+C00026	https:\\www.genome.jp\dbget-bin\www_bget?map00040
Stilbenoid, diarylheptanoid and gingerol biosynthesis	ko00945	2	4	129	346	pmb3074;Hmln002806	C12208+C10434	https:\\www.genome.jp\dbget-bin\www_bget?map00945
beta-Alanine metabolism	ko00410	2	9	129	346	mws0254;pme0257	C00135+C00106	https:\\www.genome.jp\dbget-bin\www_bget?map00410
Plant hormone signal transduction	ko04075	2	3	129	346	Lmtn004049;Lmgn001670	C06082+C00805	https:\\www.genome.jp\dbget-bin\www_bget?map04075
Lysine biosynthesis	ko00300	2	4	129	346	pme0026;pme2380	C00047+C00026	https:\\www.genome.jp\dbget-bin\www_bget?map00300
Biotin metabolism	ko00780	2	2	129	346	pme0026;pme2266	C00047+C00120	https:\\www.genome.jp\dbget-bin\www_bget?map00780
Tyrosine metabolism	ko00350	2	11	129	346	Ymjm000148;pme1439	C06046+C00811	https:\\www.genome.jp\dbget-bin\www_bget?map00350
Zeatin biosynthesis	ko00908	2	3	129	346	pmb0981;pme1474	C00020+C00170	https:\\www.genome.jp\dbget-bin\www_bget?map00908
Carbon fixation in photosynthetic organisms	ko00710	2	6	129	346	mws0275;pme3313	C00149+C00085	https:\\www.genome.jp\dbget-bin\www_bget?map00710
Fatty acid biosynthesis	ko00061	2	8	129	346	Lmyn008503;pmf0395	C06423+C00712	https:\\www.genome.jp\dbget-bin\www_bget?map00061
Biosynthesis of unsaturated fatty acids	ko01040	2	10	129	346	pmf0395;pmn001610	C00712+C16525	https:\\www.genome.jp\dbget-bin\www_bget?map01040
Ubiquinone and other terpenoid-quinone biosynthesis	ko00130	2	5	129	346	MA10107783;pme1439	C20772+C00811	https:\\www.genome.jp\dbget-bin\www_bget?map00130
Caffeine metabolism	ko00232	2	3	129	346	pme1266;mws0668	C16357+C01762	https:\\www.genome.jp\dbget-bin\www_bget?map00232
Taurine and hypotaurine metabolism	ko00430	2	2	129	346	pme2380;pme0014	C00026+C00025	https:\\www.genome.jp\dbget-bin\www_bget?map00430
Butanoate metabolism	ko00650	2	5	129	346	pme2380;pme0014	C00026+C00025	https:\\www.genome.jp\dbget-bin\www_bget?map00650
Glucosinolate biosynthesis	ko00966	2	8	129	346	Lmbp000123;pme1210	C17213+C00073	https:\\www.genome.jp\dbget-bin\www_bget?map00966
Nitrogen metabolism	ko00910	2	2	129	346	pme0193;pme0014	C00064+C00025	https:\\www.genome.jp\dbget-bin\www_bget?map00910
Isoquinoline alkaloid biosynthesis	ko00950	2	6	129	346	MWStz322;pme1439	C03329+C00811	https:\\www.genome.jp\dbget-bin\www_bget?map00950
alpha-Linolenic acid metabolism	ko00592	1	12	129	346	Zmyn004449	C21923	https:\\www.genome.jp\dbget-bin\www_bget?map00592
Glycolysis / Gluconeogenesis	ko00010	1	4	129	346	mws1090	C00103	https:\\www.genome.jp\dbget-bin\www_bget?map00010
Glycerolipid metabolism	ko00561	1	3	129	346	mws1090	C00103	https:\\www.genome.jp\dbget-bin\www_bget?map00561
Sphingolipid metabolism	ko00600	1	1	129	346	pmb2221	C12144	https:\\www.genome.jp\dbget-bin\www_bget?map00600
Isoflavonoid biosynthesis	ko00943	1	2	129	346	MWS20151	C01477	https:\\www.genome.jp\dbget-bin\www_bget?map00943
Riboflavin metabolism	ko00740	1	2	129	346	mws0232	C00255	https:\\www.genome.jp\dbget-bin\www_bget?map00740
Carotenoid biosynthesis	ko00906	1	1	129	346	Lmtn004049	C06082	https:\\www.genome.jp\dbget-bin\www_bget?map00906
Monobactam biosynthesis	ko00261	1	3	129	346	MWSmce119	C00062	https:\\www.genome.jp\dbget-bin\www_bget?map00261
Inositol phosphate metabolism	ko00562	1	3	129	346	mws0866	C00092	https:\\www.genome.jp\dbget-bin\www_bget?map00562
Lipoic acid metabolism	ko00785	1	1	129	346	Lmyn008503	C06423	https:\\www.genome.jp\dbget-bin\www_bget?map00785
Nicotinate and nicotinamide metabolism	ko00760	1	7	129	346	pma3101	C05841	https:\\www.genome.jp\dbget-bin\www_bget?map00760
Folate biosynthesis	ko00790	1	2	129	346	mws1336	C00568	https:\\www.genome.jp\dbget-bin\www_bget?map00790
Vitamin B6 metabolism	ko00750	1	5	129	346	pme0193	C00064	https:\\www.genome.jp\dbget-bin\www_bget?map00750
Monoterpenoid biosynthesis	ko00902	1	2	129	346	Zmcp002507	C01512	https:\\www.genome.jp\dbget-bin\www_bget?map00902
Porphyrin metabolism	ko00860	1	2	129	346	pme0014	C00025	https:\\www.genome.jp\dbget-bin\www_bget?map00860
Fatty acid degradation	ko00071	1	3	129	346	pme0243	C00489	https:\\www.genome.jp\dbget-bin\www_bget?map00071
Valine, leucine and isoleucine degradation	ko00280	1	5	129	346	mws0470	C02170	https:\\www.genome.jp\dbget-bin\www_bget?map00280
Propanoate metabolism	ko00640	1	2	129	346	mws0470	C02170	https:\\www.genome.jp\dbget-bin\www_bget?map00640
Pentose phosphate pathway	ko00030	1	8	129	346	pmb2507	C00672	https:\\www.genome.jp\dbget-bin\www_bget?map00030
Terpenoid backbone biosynthesis	ko00900	1	1	129	346	pme3154	C00418	https:\\www.genome.jp\dbget-bin\www_bget?map00900
Pantothenate and CoA biosynthesis	ko00770	1	8	129	346	pme0257	C00106	https:\\www.genome.jp\dbget-bin\www_bget?map00770
